# Supplementary material for: UBE2S and HIF1α expression patterns and stratified analysis reveal prognostic value in esophageal squamous cell carcinoma
Source: PeerJ journal article supplement (doi:10.7717/peerj.20694), 2026-01-28
Supplement: all_original_document.zip [file all.xls]

gene	logFC	conMean	treatMean	pValue	fdr
DDR1	0.276439401307332	663.283867857143	803.370696428571	0.00669007800419259	0.0155910275082841
RFC2	0.551127387028051	42.6889392857143	62.549125	2.73588357697715e-08	3.43413429060305e-07
PAX8	-0.300955956009405	103.62305	84.1123178571429	2.28922779016047e-05	0.000110786480043828
GUCA1A	0.775912301657901	3.42808214285714	5.86981071428571	0.000483531432786195	0.00160391468840976
MIR5193	-0.0590268456703038	71.5663	68.6973071428571	0.619840744462063	0.668519502346888
THRA	-0.0721424167477291	55.2732857142857	52.5772964285714	0.788511973651229	0.815764513999851
PTPN21	-0.0617953904046415	9.81559285714286	9.40403571428571	0.0178875054080224	0.0361456389716393
CCL5	0.577183256014657	219.9735	328.185839285714	0.114303394165651	0.172122010155662
CYP2E1	-1.00086564680092	23.405025	11.6954928571429	1.9375578244107e-07	1.80796015158746e-06
ESRRA	0.151136829682696	108.353378571429	120.320375	0.0699619321827051	0.11463335171745
SCARB1	0.74964816007932	42.9096214285714	72.1474964285714	1.53525961408774e-07	1.47483882037852e-06
TTLL12	-0.193230090450605	413.095125	361.311692857143	0.0330787325559912	0.0610380344478544
LINC00152	0.190850927656425	19.3454964285714	22.0816607142857	0.000482089074226451	0.00160391468840976
WFDC2	-0.0438024479649042	9.29208214285714	9.0142	0.140255393759537	0.20405780957879
MAPK1	-0.0251210361038199	56.0656178571429	55.0978214285714	0.574634438977333	0.628832340455934
ADAM32	0.0122270793408301	2.96584642857143	2.99108928571429	0.844105026102714	0.864656082643356
SPATA17	0.254354022129549	5.67591428571429	6.77023928571429	8.98359040134193e-05	0.000367807552067323
PRR22	-0.160519341283091	10.8277	9.687575	0.0628898134840642	0.104871753843911
VPS18	-0.158522931443753	19.1912	17.1942	0.00742161470814237	0.0170628606266613
MSANTD3	1.09469866475377	56.9601321428571	121.648882142857	4.67362684397252e-09	8.10721023762217e-08
TIMD4	0.166735614501731	7.85088928571429	8.81274642857143	0.215994816916971	0.290571089463646
SLC39A5	-0.0268435963465636	40.0500357142857	39.3117321428571	0.468865488808984	0.534565259113486
ATP6V1E2	0.419029699009388	15.5638607142857	20.8093178571429	8.16723681224461e-07	6.22409912342574e-06
AFG3L1P	0.222870898902539	48.2425392857143	56.3016321428571	0.0464770552817516	0.0814435638757729
CILP2	0.0928246162194393	6.50144285714286	6.93350357142857	0.138945456702551	0.202263220539007
PIGX	1.3361228342706	54.5501821428571	137.723882142857	2.7973023249068e-10	8.50564785948313e-09
TMEM196	-0.0449158242692658	11.8755464285714	11.5115178571429	0.263927981321902	0.339544551289691
SLC39A13	0.313586888368201	25.1450785714286	31.2501464285714	3.82251735965019e-07	3.24492318019563e-06
BEST4	0.0423219093157607	5.30246785714286	5.46032142857143	0.643000625732351	0.688654971780048
AK9	-0.41024888012888	11.9383035714286	8.98349642857143	1.24128779990866e-06	8.90487244388711e-06
TMEM106A	0.250709968097404	6.80115	8.09195714285714	0.181696359584331	0.252080769495424
ALG10	0.177588844024658	9.39571428571429	10.6264785714286	0.0558096967385945	0.0949514118561681
TTC39C	0.316984623989533	28.69305	35.743625	0.000319722690398389	0.00111747172533462
NEXN	-1.30965952794759	308.584657142857	124.488010714286	2.22748557750605e-09	4.37699881864072e-08
RAX2	0.0446353158146282	37.8894571428571	39.0800357142857	0.198284408556703	0.271144837563687
MFAP3	-0.140104412586392	25.0739142857143	22.7534107142857	0.130320502774485	0.192019271754956
EYA3	-0.0102795058565226	6.21388214285714	6.16976428571429	0.726656563877435	0.762430979739125
GIMAP1	-0.0757998571632976	17.6383714285714	16.7355678571429	0.376208205103391	0.448596700732649
FAM122C	-0.293397434278261	3.46203214285714	2.82494285714286	1.36495713906404e-07	1.33302205509978e-06
CCDC11	0.0866154199776397	2.57017142857143	2.72920357142857	0.0929973177226197	0.145340968925541
ARMCX4	-0.503503881877048	9.30530357142857	6.56388214285714	2.28922779016047e-05	0.000110786480043828
RBBP6	0.436943394922135	57.8523142857143	78.3165964285714	0.00247896791815934	0.00665850971595458
TRIOBP	-0.141013565700367	72.53105	65.7770892857143	0.0060229439122623	0.0142720369516523
CATSPER1	0.0794474987051457	21.8455035714286	23.08225	0.0602404893106144	0.101244399244007
HOXD4	0.0768733512531279	9.05338571428571	9.548875	0.230404426179144	0.305096287775574
GSC	-0.101847943127507	8.04702857142857	7.49853214285714	0.167414490920988	0.235305364372775
SP7	-0.0127991142408406	14.6283107142857	14.4991071428571	0.714479022269836	0.751965364446814
PDE7A	0.416180464120901	15.995925	21.3448035714286	0.000124005631407512	0.000486077269397514
CNOT7	0.408878867531349	12.7736678571429	16.9590071428571	0.0727510314441908	0.118342050611331
CRYZL1	-0.483229101793536	63.0362607142857	45.0945428571429	1.53525961408774e-07	1.47483882037852e-06
PRSS33	-0.158080918751177	16.6026142857143	14.8795357142857	0.0374769713973468	0.0677248010999958
C19orf26	0.0127411851045118	6.96399285714286	7.02576785714286	0.738902438193975	0.773094986873936
TIRAP	-0.259590007274588	34.1567071428571	28.5319607142857	0.00486272930062306	0.0118943527726636
LEAP2	-0.320200118440817	42.3855107142857	33.9490464285714	0.0122366754329478	0.0261845057823533
MSI2	1.15378470971031	12.2599714285714	27.2780464285714	1.91875979380587e-12	2.72528278632977e-10
SCIN	-2.81008121306972	212.302839285714	30.2717178571429	1.50692459685244e-12	2.36229964764357e-10
C4orf33	-0.334512698212305	27.1941107142857	21.5663428571429	0.000451767466284812	0.00151229909664433
ZNF333	-0.245292003189416	10.6199964285714	8.95950714285714	0.00114256624979618	0.00339179822477719
TVP23C	-0.0137452674594627	53.0547642857143	52.5516857142857	0.541771224709468	0.599974067426817
RDH10	1.68960175847138	9.90961785714286	31.9652214285714	2.64528132077239e-08	3.39697139511566e-07
SRSF12	0.162930501607168	3.66370357142857	4.10173214285714	0.000720992938356498	0.00226418957626333
FAM71A	-0.149343534590971	28.7998357142857	25.9676785714286	0.0699619321827051	0.11463335171745
GAPT	-0.145317139466578	9.06116785714286	8.19293214285714	0.0868776267652825	0.137177588243951
FLJ30901	-0.509767625404948	41.556525	29.186625	1.00822361087966e-06	7.45789453933808e-06
CCDC185	-0.151400584295844	5.90039642857143	5.312575	0.00756030612661143	0.0173704004513601
ENTHD1	0.0880799031470436	2.96166071428571	3.14811071428571	0.161163112276976	0.228798005539916
TSSK3	-0.0227091183997521	56.878875	55.9905678571429	0.738902438193975	0.773094986873936
WFDC6	0.0590266314955046	9.28580714285714	9.67360714285714	0.374687780781764	0.44728776538157
CLEC12A	1.00137264572431	8.71003928571429	17.4366607142857	4.26960464275457e-07	3.55319083974105e-06
BRF1	0.00456955861787378	3.17245357142857	3.18251785714286	0.726656563877435	0.762430979739125
C15orf27	0.0723774034620854	9.66615357142857	10.1634571428571	0.118157078619365	0.17696802935751
BACH1	0.181533745435394	4.06313571428571	4.60795714285714	6.67523064715468e-05	0.000280962422803768
CALML6	0.032759024093588	8.37754285714286	8.56994642857143	0.654711701299896	0.699604328937627
NLRP5	0.0328949381469652	7.39218571428571	7.56267142857143	0.468865488808984	0.534565259113486
ODF4	-0.385917124341867	4.99432857142857	3.82212142857143	2.4614584452852e-06	1.61475031238595e-05
CLEC4F	-0.456869447646708	21.7031035714286	15.8121321428571	5.16878834085267e-08	5.80302746193449e-07
DEFB106A	-0.32002370311782	67.8483214285714	54.3503535714286	0.000451767466284812	0.00151229909664433
WFDC9	-0.0945588929560497	8.32950357142857	7.80106785714286	0.0390476266885083	0.0701498237358999
NEDD1	0.39988829092115	4.73725714285714	6.25036428571429	0.000155285500411	0.000593732076819872
TTLL10	-0.146796246569842	12.9465392857143	11.6940142857143	0.000421923400113368	0.00142661206528187
CALR3	-0.14016741723013	4.91835357142857	4.46298214285714	0.00106043517098229	0.00316798271082696
C10orf25	-0.0535197596724584	12.80265	12.3364107142857	0.726656563877435	0.762430979739125
ETV3	0.0471580470074411	23.0774357142857	23.8442428571429	0.365949367121097	0.439359304270935
KLHL10	0.0193658900758811	4.74035357142857	4.80441428571429	0.654711701299896	0.699604328937627
TM2D3	-0.0972687585149803	224.158860714286	209.543935714286	0.152683954875419	0.218431050971979
ZNF485	-0.190988598723796	4.55471428571429	3.98995357142857	0.000298002484233234	0.00105145491394264
WDR17	-0.179690898859139	3.10101785714286	2.73786428571429	0.000113774485721732	0.000453533516920138
MFSD6L	-0.133136168242608	39.2228392857143	35.7652321428571	0.0134738698417713	0.0284209615729499
ANKAR	-0.185975890720256	6.803375	5.98053571428571	0.000124005631407512	0.000486077269397514
MEGF11	-0.00568081516069951	2.65819285714286	2.64774642857143	0.799488595006896	0.826359906031367
GPR182	-0.0616128221853529	6.05587857142857	5.80269642857143	0.22526490919081	0.299810154908818
ESX1	-0.0178331165639944	7.769125	7.67368214285714	0.251332907453337	0.326567396706768
C8orf12	0.0107727568575693	6.16168214285714	6.20786428571429	0.420252829793535	0.489936133802709
LOC653486	-0.019679270224279	4.58633214285714	4.52419642857143	0.928184585217753	0.938879777780485
DNAJC5G	-0.0686325118763795	19.6758142857143	18.7617035714286	0.143416830688969	0.207516093796708
WDR88	-0.0179423309048348	4.97644285714286	4.91493571428571	0.608396633829791	0.658391182334827
PRUNE2	-1.49773276828615	45.2777892857143	16.0332928571429	1.72540886915833e-07	1.6337730603131e-06
MBD3L2	-0.20175423748077	7.87610357142857	6.84821428571429	0.000421923400113368	0.00142661206528187
ADAMTSL1	-0.155194519740377	8.01307142857143	7.19582857142857	0.0110995518835613	0.024102176945599
MBD3L1	0.127159067718804	2.82540714285714	3.08574285714286	0.0178875054080224	0.0361456389716393
FAM46D	-0.0828067773416328	2.89210714285714	2.73078214285714	0.0199625875649985	0.0398226202239315
SERPINB11	-1.7683814562348	49.5311	14.5392535714286	5.25204216902252e-05	0.000228513504159177
DSCR10	-0.0345928016795787	63.1719142857143	61.6752	0.489134496939558	0.552849463722061
ABHD11	0.0544141518405641	4.66984642857143	4.84934285714286	0.110547711354912	0.167395622166858
ACAP2	0.207435241136014	62.7430678571429	72.4452607142857	0.243437706970906	0.318213229933619
GAMT	0.0197889070548323	80.9044714285714	82.0218535714286	0.43933887306239	0.507268731006567
PLCD3	-0.300337536325026	14.0635571428571	11.4204857142857	5.85378616250323e-08	6.44556069495608e-07
IRF6	1.2578342565273	80.2565785714286	191.922760714286	2.7973023249068e-10	8.50564785948313e-09
PTPRC	0.569522960616349	3.69372857142857	5.48161428571429	0.000578937371946273	0.00188059118994612
MAN1A2	-0.0109609099119092	10.260725	10.1830642857143	0.694104685947024	0.734320009432957
RAPH1	-0.0177178088978103	8.04438214285714	7.94619285714286	0.293022308659156	0.368879371730041
LACTB	0.235285687684796	12.1515392857143	14.3040607142857	0.0978986947138716	0.151646891149578
BNC1	0.940693003334269	39.1305464285714	75.1091285714286	0.000144130620269618	0.000554891089096949
MPP4	0.635445497132853	2.59175357142857	4.026075	0.00719918229620486	0.0166382324925831
IDI2	-0.0602038901311679	12.4722964285714	11.9625357142857	0.31618275443615	0.391743787373821
CYP11B1	0.149528860380367	11.1534071428571	12.3714392857143	0.00263808360635204	0.00702437888289233
TAF8	-0.113717090584006	8.16691785714286	7.54789642857143	0.0162771801031149	0.0334181182113136
COBL	-0.746024051090819	12.920275	7.70364285714286	1.07702411170626e-08	1.61309704713656e-07
SLAMF6	-0.0801730926055004	26.18165	24.7663785714286	0.19264368005378	0.264796979960768
ZSCAN20	-0.0746366908110176	6.22344642857143	5.90966785714286	0.0440926207307084	0.0778063981092289
GPBAR1	-0.0259550499790953	27.1906285714286	26.705825	0.730748912443503	0.766155027695906
RHBDL2	-1.11825999657913	69.9832785714286	32.2377321428571	8.17314691664804e-09	1.28505429566881e-07
FRAS1	-0.00731084267586279	13.4062678571429	13.3385035714286	0.877276057684585	0.894219882900437
BRSK1	0.121904479707232	21.3378642857143	23.2192321428571	0.0423540488565084	0.0752088216101936
CRB2	-0.0207025409638226	6.84082857142857	6.74336428571429	0.517443516922891	0.578879164171864
CD300LG	-0.434926938145345	15.4459964285714	11.4258857142857	2.28922779016047e-05	0.000110786480043828
SLC34A3	-0.0961839528003461	179.015553571429	167.469803571429	0.0155329013571092	0.0320861680254272
WBP2NL	-0.0580649456550375	3.3351	3.20353571428571	0.0625610840991628	0.104390146084569
MTBP	0.172845911750086	6.949975	7.83456785714286	0.00144774913731862	0.00415552895606591
ACVR1C	1.12885401431075	28.5903142857143	62.5227178571429	2.10691110951694e-08	2.78504433545953e-07
TMEM74	-0.350984606349026	15.3450357142857	12.0312571428571	2.73083511548021e-07	2.43440031798263e-06
TIGD4	-0.0305765717527067	2.22108928571429	2.17451071428571	0.354512412522428	0.429305687011452
ART5	-0.0766479111226044	22.4658785714286	21.3034571428571	0.224074100898975	0.298544459665387
FAM71C	-0.208876413135471	13.6405857142857	11.8019821428571	0.000933863225311252	0.00283630129696642
C21orf67	-0.231310269378587	33.3462107142857	28.4063321428571	2.28922779016047e-05	0.000110786480043828
NLRP11	0.129068150818755	6.37366428571429	6.97015714285714	0.0795296586089977	0.127641905440787
ATP6V1C2	-1.69756870740872	24.4646464285714	7.54257857142857	1.07702411170626e-08	1.61309704713656e-07
CLDN19	0.120845371346663	24.12505	26.2329	0.0163631730223055	0.0335556037471949
VTI1A	0.0210340277739425	13.6666035714286	13.8673178571429	0.449062510297533	0.516326736141839
KIF6	-0.0579410732336614	5.67958928571429	5.45600714285714	0.286802318505917	0.362472228518407
IQCD	-0.269115235533329	21.6382714285714	17.95605	2.95198793568081e-05	0.000138031199034054
TAGAP	0.0348830219656211	45.1455964285714	46.2504785714286	0.309628755090449	0.384998433841314
SERPINA12	-0.100351785880017	9.97626428571429	9.30591428571429	0.04052182309462	0.0726563360707196
LETM2	0.604942658618871	6.67878928571429	10.1578928571429	0.110547711354912	0.167395622166858
BSND	0.124788137905509	4.53628928571429	4.94613214285714	0.0195348373378274	0.0390612619391242
CLEC4C	0.162547746808927	6.14337857142857	6.87605	0.153960940052791	0.220005089421824
NLRC4	0.45388875856261	12.6033892857143	17.2632071428571	1.13616586861757e-05	5.98722068664184e-05
PRSS36	0.293739367577794	14.8802071428571	18.2403571428571	9.0774386106162e-07	6.83407446874673e-06
ZDHHC15	-0.52831129968524	8.49361428571429	5.88918214285714	2.66724974362551e-06	1.72779327592123e-05
RAI1	0.0331343183966908	19.6350142857143	20.0911892857143	0.394141862740803	0.465912095245691
AF131215.4	-0.0420865358673206	7.22452857142857	7.01681785714286	0.167414490920988	0.235305364372775
NUDT9P1	-0.110679748795481	3.51347142857143	3.25400714285714	0.00318050016661995	0.00826315289569735
BTBD16	-0.000391733913712056	6.34061428571429	6.33889285714286	0.890108936221332	0.905294858576127
RTP3	-0.297535243450458	21.2156678571429	17.2619428571429	2.5369249667734e-05	0.000121523184861533
TSPEAR	-0.0303589547240257	8.30351785714286	8.13061071428571	0.357337187090213	0.431319619596771
MIPOL1	0.16438200636063	2.73481428571429	3.06486785714286	0.0178585031460958	0.0361284296033673
ADAM21	-0.160246550504003	8.0823	7.232625	0.0116560348410694	0.0251351808988742
TRIML2	0.0439937753154607	7.01831785714286	7.23563214285714	0.478942394730693	0.543769200626913
ABCC13	0.149253393754414	4.10010714285714	4.547	0.31618275443615	0.391743787373821
IL12RB1	0.847880174131516	35.9455214285714	64.6967035714286	1.13616586861757e-05	5.98722068664184e-05
GTF2A1L	-0.0217270002109218	3.29350357142857	3.244275	0.664100640975672	0.709028446421559
TRPV3	-0.0901502793619304	20.3030107142857	19.0731535714286	0.111936170970526	0.169304258594142
CNBD1	0.0449246764528981	2.86906071428571	2.95980714285714	0.20118060231926	0.27383490396723
ABCC12	-0.0746619868098584	3.91157857142857	3.71429642857143	0.0374769713973468	0.0677248010999958
MMP21	-0.0563700941086684	3.10138571428571	2.98254285714286	0.104733843117452	0.160162029185247
TMEM190	0.00149027306034899	20.9065178571429	20.928125	0.844105026102714	0.864656082643356
GAS2L2	-0.0841189074555899	22.3349285714286	21.0698892857143	0.194256463521363	0.266070127338205
KCNG4	-0.0565028954964575	8.05379642857143	7.74446785714286	0.552622439769264	0.609376234516305
PXT1	-0.0909622483245669	6.42795	6.03517857142857	0.0108227282459209	0.0236731206796506
CACNG5	-0.0438259533964773	14.2525	13.82605	0.163648507023175	0.231163619952707
LINC00308	-0.0597180687353642	8.56903571428571	8.221575	0.0964755698193966	0.149543139536211
FAM223A	0.0621526229724654	11.7612285714286	12.2789857142857	0.726656563877435	0.762430979739125
WFDC11	-0.00632708421496631	6.44669285714286	6.41848214285714	0.980548633022288	0.983476337471596
IFNL2	0.0419805572863687	5.27945	5.43533214285714	0.52038757077133	0.580668678700499
JAK1	-0.0762328810402098	28.7809535714286	27.2996321428571	0.122110209627572	0.181923151450074
CDC42SE2	0.148676950858185	27.3573964285714	30.3271071428571	0.417272444368857	0.487939923758323
ACACB	-0.130212397429976	70.5855071428571	64.4937607142857	0.00153908493486501	0.00438852795426411
STX6	0.747022041970668	75.1943535714286	126.200557142857	2.53638184790364e-14	2.23656037696603e-11
ANLN	0.760335896336819	7.84202142857143	13.2834821428571	0.0116560348410694	0.0251351808988742
SPRR4	0.465754009109338	64.1047607142857	88.5311714285714	0.31618275443615	0.391743787373821
POLR2J	0.825034681104168	51.2745928571429	90.8369214285714	2.28922779016047e-05	0.000110786480043828
LOC441259	0.576665851071441	21.4239392857143	31.9516321428571	0.00120238470487637	0.00354007616990799
HSH2D	0.161448451091235	9.13015357142857	10.21125	0.134580461474354	0.197061254146665
TRNT1	0.14640764647304	12.7854142857143	14.151025	0.0423540488565084	0.0752088216101936
TMEM163	0.486645612218279	13.236925	18.5473571428571	5.9239768536977e-07	4.72912569425894e-06
ARHGAP5	-0.687804789902065	29.4412142857143	18.2770392857143	0.00153908493486501	0.00438852795426411
HERPUD2	-0.428804336139732	157.680635714286	117.13735	0.000240708133762785	0.00087227846486675
SRCAP	0.203856835822077	7.78604642857143	8.96776071428571	0.00571199762513604	0.0136436801061799
MAP3K6	0.0589249776657068	17.1261142857143	17.8400892857143	0.324158563692514	0.399567108359524
ARSG	-0.235973481343233	12.85865	10.9184321428571	0.0016076222345932	0.004577786511127
ZNF101	-0.317712721324583	30.9045464285714	24.7959821428571	7.68561076255675e-06	4.31016621783381e-05
PTPN11	0.0186079743670828	4.24446785714286	4.29956785714286	0.449062510297533	0.516326736141839
KLHDC7B	0.47128065947794	14.1029714285714	19.5515071428571	1.00042545172431e-06	7.45789453933808e-06
ATAD3A	0.430100370901868	20.18445	27.1950607142857	3.05708175954657e-07	2.68229773123068e-06
ZNF626	-0.632139170579174	36.8058142857143	23.7478107142857	4.62298474937455e-10	1.26403393089165e-08
PHC3	1.20860323592919	10.5830142857143	24.4588035714286	1.98357873156637e-10	6.54890432077053e-09
IL11RA	-0.149893177412348	20.9991357142857	18.9268821428571	0.0423540488565084	0.0752088216101936
TNFRSF10A	0.329638208737064	36.272475	45.5835535714286	0.0406728541997739	0.0726563360707196
RAD51L3-RFFL	-0.619292905858357	15.059225	9.80340357142857	1.64537443817492e-09	3.42726960975353e-08
HPS4	0.0717509913590026	20.8484357142857	21.9115285714286	0.195464349547736	0.267516783902137
UHMK1	0.00472804044605057	10.1563535714286	10.1896928571429	0.928764737883781	0.938879777780485
TXNDC2	0.0876100902759269	12.3822857142857	13.1575214285714	0.123465534977691	0.183761243176938
NAV3	-0.191415651407414	5.82056428571429	5.09733571428571	0.0964755698193966	0.149543139536211
PCDHGB7	-0.0341278184617335	2.20918928571429	2.15754285714286	0.241317936058878	0.316861997241786
ERC1	-0.142375964819131	32.9317964285714	29.8370571428571	0.0244770832040105	0.0472032542232982
FLCN	0.104526413031215	39.6681642857143	42.6488857142857	0.15748225616062	0.223842903292847
JMJD1C-AS1	0.0550939435296502	20.5745392857143	21.3754392857143	0.365949367121097	0.439359304270935
LRRC7	-0.0227862875545364	2.81266785714286	2.76859285714286	0.600008853344491	0.651412679594186
SH2D3C	0.147498888182182	16.0532821428571	17.7813785714286	0.0267144479794465	0.0508644050912304
PPP1R3B	-0.014356559296183	8.78875357142857	8.70172857142857	0.394141862740803	0.465912095245691
SLC9A7	0.339079623629128	9.94369285714286	12.5782678571429	1.08280201080755e-05	5.76631579132365e-05
IGSF3	0.220603618517537	21.0499	24.5277857142857	0.000144130620269618	0.000554891089096949
DIRC1	0.0727498823299149	2.44506071428571	2.57151785714286	0.0182875000338308	0.0369186648112145
DNAJB7	-0.001693859912822	2.94016071428571	2.93671071428571	0.947737313696539	0.955002607835437
UCN3	0.100340094728467	14.01495	15.0243928571429	0.211782622738552	0.285329491024699
DIP2A	-0.127695258955238	9.5702	8.75953214285714	0.000875871231458095	0.00268133413443478
USP28	0.355432342283303	10.0313464285714	12.8337928571429	5.98417906346603e-06	3.45170840883433e-05
CASC5	1.26346032415126	13.4220428571429	32.2224142857143	6.40843545104659e-10	1.60309361052599e-08
SENP8	-0.255673606830967	7.86207142857143	6.58523928571429	1.48332037644091e-05	7.54785023482062e-05
GRHL1	-0.861165315230541	45.6310071428571	25.1202214285714	1.16758631908849e-05	6.14820335179639e-05
CNBD2	-0.105102424305998	15.5302428571429	14.4390714285714	0.15748225616062	0.223842903292847
CASKIN1	0.110073637434267	47.6911678571429	51.4722821428571	0.285557682443612	0.36124438003193
CACNA2D4	-0.134872387167171	16.0197178571429	14.5899642857143	0.00190048275750929	0.00528375152353772
ARL11	0.359368453048834	3.636475	4.66510357142857	0.00571199762513604	0.0136436801061799
SLC2A13	-0.000717025583325315	2.40787857142857	2.40668214285714	0.81216850140033	0.837182243697695
NIPA1	0.123531931865381	5.54115357142857	6.036525	0.0324746502152564	0.060191016159176
CARD16	0.297669674014349	140.456421428571	172.64305	0.064953837068366	0.107678055293579
CARD16	0.299416834927854	105.499592857143	129.832742857143	0.0234195814702408	0.0454955574311278
DUSP19	-0.214585428747984	3.30931428571429	2.85194642857143	0.00865103871195174	0.0194747295246287
CYB5D1	-0.00727559227810826	68.6403392857143	68.2950535714286	0.531025678268812	0.590236156995949
NMNAT2	-0.148942520974922	23.6016	21.28655	0.0931877147545561	0.145340968925541
SLC4A1	0.0472812244318681	4.9272	5.09135357142857	0.149283643181531	0.214654826786978
CREG2	0.679834127144172	4.66143214285714	7.46740714285714	0.0278967184391927	0.0527547361566111
RXFP1	-0.141186700080238	3.65781428571429	3.31680714285714	0.00151963595429375	0.00435773112475862
SPEF2	-0.101386557714233	8.70394642857143	8.11326785714286	0.20581993495825	0.278858340814433
CEP170	-0.0588310356105586	12.7979821428571	12.2865964285714	0.131653124489143	0.193780433548736
DTD1	-0.20482744943303	18.3156214285714	15.8914107142857	0.00112938905679819	0.0033550337744273
CASC4	0.0326473032155681	23.7969642857143	24.3416142857143	0.555233387425733	0.611809027287868
FGF1	0.103631435458967	5.035175	5.41016785714286	0.337728647045328	0.413414661019714
ARPP21	0.0943781770956782	2.31248214285714	2.46881785714286	0.00372485247363835	0.00946476849674714
RHOXF1	-0.0382197366399839	16.2717857142857	15.846375	0.52038757077133	0.580668678700499
ADAMTS17	-0.0608353230010472	8.34968214285714	8.00491428571429	0.489134496939558	0.552849463722061
SNHG7	0.0240522349174221	15.4685892857143	15.7286392857143	0.478942394730693	0.543769200626913
DHH	-0.0782913189867926	14.3670642857143	13.6081785714286	0.110547711354912	0.167395622166858
ABRA	0.0463622840570639	3.69119642857143	3.81174285714286	0.301881921669694	0.377393936248905
KLHDC1	-0.529782690123765	35.972475	24.9166607142857	3.72178023009191e-06	2.28832176087842e-05
NETO1	0.438635202244355	4.17793571428571	5.66244642857143	0.000342886695649744	0.00118939700705385
WWP2	-0.0355127013171246	3.68555	3.59593571428571	0.455900698025692	0.523591820280985
ST7L	0.398683419242517	5.64233214285714	7.43831071428571	1.11907460358627e-06	8.15529470926179e-06
C2orf15	-0.0290321358904986	2.66623571428571	2.61311785714286	0.552622439769264	0.609376234516305
KCNH8	-0.0285713398283289	5.60556785714286	5.49564642857143	0.309628755090449	0.384998433841314
MCF2L	-0.288741990841475	19.6998321428571	16.1265892857143	2.73083511548021e-07	2.43440031798263e-06
SLCO6A1	0.164765531830779	5.26138571428571	5.89792857142857	0.015296015483571	0.0317362329096876
PP2D1	-0.0723704687149547	3.04264285714286	2.89377857142857	0.0531524913449946	0.0913856669375352
KLC3	-0.00139367107303912	76.7916928571429	76.7175464285714	0.902970204994289	0.916437677359205
CIB3	-0.225787124419878	4.57370357142857	3.91110357142857	2.95198793568081e-05	0.000138031199034054
CADM2	-0.045195505584716	4.99245714285714	4.83848214285714	0.198307413684768	0.271144837563687
C9orf66	-0.310595582127718	13.3355142857143	10.7525428571429	1.35789895891035e-05	6.9750523464611e-05
SLC16A11	-0.13030670162202	25.7560464285714	23.5316821428571	0.072580343196597	0.118264382743269
TMEM67	0.037545852417215	2.75932857142857	2.83208214285714	0.247962858252799	0.323579295221209
HS6ST2	0.0581631383333103	3.47173928571429	3.61456428571429	0.309628755090449	0.384998433841314
CAMKK1	-0.0513986193242832	16.8237428571429	16.2349178571429	0.188653862584955	0.259690496545167
ZNF625	-0.191107111855642	13.3548821428571	11.6979857142857	0.000591471286115851	0.00190725382112902
ZNF563	-0.266127301387649	16.0278857142857	13.3279678571429	1.2424253074971e-05	6.46348249325495e-05
LIN9	0.0270743622315655	4.45436071428571	4.53874285714286	0.736901869276844	0.772241681890326
CLEC4D	0.229586642287761	8.24524642857143	9.66754285714286	0.00278297036230825	0.00735513908070601
SLC25A27	-0.137860986614548	8.806625	8.00403928571429	0.00781313375412631	0.017854373138816
GPRC6A	-0.0770051363676165	17.6479785714286	16.7307	0.113796455706738	0.171982745991694
RAET1E	-0.837602735673662	30.9095464285714	17.2961357142857	2.9995277881575e-09	5.61264426001567e-08
SLC44A5	0.00808676334250857	3.65589642857143	3.67644642857143	0.780544462424479	0.809205764939224
ZNF417	0.0235846342290977	2.30598214285714	2.34398928571429	0.176395390454143	0.246260020329905
ZNF781	-0.160481261957965	3.85489285714286	3.449075	0.000376450388757529	0.00129361389321298
HELB	0.286580835493055	4.32122142857143	5.27079285714286	0.000167231680593386	0.00063379728803686
SEC62	-0.089491264040932	26.2576428571429	24.6783535714286	0.236858748312585	0.311537706062103
TRDN	-0.00377061625177699	2.65581071428571	2.64887857142857	0.76801822802505	0.798230515651416
SOCS4	0.335915855317492	4.52403214285714	5.71013571428571	0.00233844600400567	0.00632522147019069
C8orf31	-0.0664717666230463	7.43966428571429	7.10466071428571	0.0291230192157034	0.0547314142315896
ZNF547	-0.263533836922654	6.88243214285714	5.733375	0.000675198883972971	0.00213814663796498
SIM1	0.0487105573468751	4.92563214285714	5.09477857142857	0.279452621499626	0.355326593895493
PROM2	-0.525052675817804	492.371482142857	342.165553571429	0.000451767466284812	0.00151229909664433
TLR4	0.252409661638898	14.0055928571429	16.6833928571429	0.000528507966134639	0.0017343485947135
TSNARE1	0.0210634380626513	6.84238928571429	6.94302142857143	0.712343775955685	0.751100160956114
CAPN13	-0.0638387396025708	5.15826428571429	4.93498928571429	0.122110209627572	0.181923151450074
STMN1	-0.198194327403784	4.94886428571429	4.31363214285714	3.63467982036999e-05	0.000166315089812952
SIGLEC10	0.695666641551332	11.4835607142857	18.59915	5.44823999468052e-06	3.18863669821415e-05
RFX4	-0.0161128254411511	5.13763214285714	5.08057142857143	0.824913448025768	0.848408689059883
WFIKKN1	0.00447189339073795	26.0762928571429	26.1572464285714	0.666506966112184	0.710307529652138
SENP1	0.189607215987609	11.9347857142857	13.6110642857143	0.0292955304769649	0.0550018906568496
KLF14	-0.0864405183847547	16.06175	15.1276571428571	0.147995900098742	0.213020283873337
BRS3	-0.0745709445775837	3.82676071428571	3.63398571428571	0.187099551059197	0.258344645329488
LINC00205	-0.180311455765312	10.1187321428571	8.92990714285714	0.000169341277358487	0.000641103658808168
TMX3	0.369483608675208	3.33521785714286	4.30873571428571	4.46562756006945e-05	0.000198458790537064
ZNF396	-0.221866014573265	3.35341785714286	2.87540714285714	2.27095701627186e-06	1.49842644632894e-05
SLC26A7	-0.0520027460122656	2.18036428571429	2.10317142857143	0.0345205423527852	0.0632408446859412
SNX18	0.160116121038842	7.733775	8.64154285714286	0.0128423284515789	0.0272846297581331
B3GNT6	0.000299118013734834	12.177225	12.17975	0.915856574833367	0.927470221705357
DENND1B	0.0337232770863594	8.44091428571429	8.64054642857143	0.293022308659156	0.368879371730041
ZNF619	-0.190965312368334	29.1376178571429	25.5251178571429	0.00144774913731862	0.00415552895606591
FAM71D	-0.0781401984818868	6.46389285714286	6.12310357142857	0.0199668205451088	0.0398226202239315
HS6ST3	-0.123538927248238	13.3736	12.2760714285714	0.0496669167368866	0.0860570622975873
CLDN15	0.101241340145588	22.1304035714286	23.7391964285714	0.0252966926736224	0.0486995276131967
RAB42	0.276905053121578	39.4744	47.8269035714286	0.00669007800419259	0.0155910275082841
PTCHD1	-1.51980335891078	27.3199142857143	9.52736785714286	6.62359416067414e-08	7.11910224592924e-07
ZSCAN4	-0.010408081047083	3.54342142857143	3.51795	0.915856574833367	0.927470221705357
VWA5B1	-0.0446215895080959	7.81246428571429	7.57452857142857	0.324158563692514	0.399567108359524
LINC00311	-0.0323672594382791	5.28498928571429	5.16773928571429	0.670060430263339	0.713771021576637
HTR6	-0.0387962636113519	6.38863571428571	6.219125	0.332262106334436	0.407396463288277
MAGEB6	0.0219334906262811	2.23993928571429	2.27425357142857	0.468865488808984	0.534565259113486
LOC101060464	-0.0559229851698633	9.30496071428571	8.951175	0.187114620971053	0.258344645329488
RUSC1-AS1	0.303636623532333	21.8630071428571	26.9844535714286	0.0060229439122623	0.0142720369516523
CACNG6	-0.343547850542917	135.198592857143	106.550125	8.660621868979e-06	4.73603980912668e-05
LMNTD1	-0.123170612349626	19.4586678571429	17.8663178571429	0.0234195814702408	0.0454955574311278
CIRBP-AS1	0.027858045659924	33.4576357142857	34.1099714285714	0.478942394730693	0.543769200626913
AXDND1	0.447696546951191	5.78017142857143	7.88335	0.0060229439122623	0.0142720369516523
CD200R1	0.00163448400896749	3.21043571428571	3.214075	0.954633130705365	0.960624836913016
LINC00334	0.0385782995076376	4.96644285714286	5.10103928571429	0.153960940052791	0.220005089421824
ATOH7	-0.0747401222444182	2.29791071428571	2.18189642857143	0.0345205423527852	0.0632408446859412
SEC16B	0.0443988668226987	4.34124285714286	4.47692142857143	0.826293419422692	0.848587743739624
AMER1	0.0741259967813428	11.1454285714286	11.73305	0.4016549257086	0.473075645189843
NKX6-3	-0.263897940820284	12.2879857142857	10.2338607142857	0.000875871231458095	0.00268133413443478
TBATA	-0.0923041876586166	6.182575	5.7994	0.074062607498592	0.120335599452379
EXOC3L2	-0.133193658882941	78.5705678571429	71.6414892857143	0.00412753986584361	0.0103264128361329
CAMK2N2	-0.0857957190828458	30.18665	28.4438142857143	0.0674202756474771	0.111131341500705
KCNG3	0.650364522257793	3.86954642857143	6.07350357142857	1.92742420674387e-05	9.53707703701672e-05
LINC01312	0.0930279126598152	3.75816428571429	4.00848214285714	0.201172902485102	0.27383490396723
FOXP2	-0.126818807861717	8.08883214285714	7.40814642857143	0.0122366754329478	0.0261845057823533
FMR1NB	-0.0764287723737505	2.53908571428571	2.408075	0.0492461702505493	0.0856717386775483
GCSAML	0.0550411961629105	3.12741785714286	3.24903928571429	0.528096214067207	0.588502415768321
SIGLEC11	-0.220719968684465	10.03295	8.60964642857143	0.300614635597008	0.376243866174196
IL23R	0.0651946228327449	3.30557142857143	3.458375	0.0853094864700858	0.135356297247077
MAGEB18	-0.031313795940425	2.22207857142857	2.17436785714286	0.0868130628762172	0.137177588243951
CD276	0.0942524179310644	8.27417857142857	8.83278571428571	0.0552007409593889	0.0942943967167283
IFNL2	0.090568751620018	7.85076428571429	8.35941428571429	0.0899889089469014	0.141194786480077
IFNL1	-0.0777095613039482	7.12934642857143	6.75548928571429	0.125474186799891	0.186593367665385
C4orf36	0.107594575438566	3.35033928571429	3.60975714285714	0.0423540488565084	0.0752088216101936
FIGNL1	0.338678267142162	9.97339642857143	12.6123321428571	0.0222540840128398	0.0437616781233719
RIMS1	-0.0875743245659506	3.63399285714286	3.41996428571429	0.0374769713973468	0.0677248010999958
PITPNM2	-0.111872353165232	7.83392142857143	7.24940357142857	0.00865103871195174	0.0194747295246287
PCDH10	-0.0297271014270439	10.8764	10.6545821428571	0.528089163734727	0.588502415768321
TAB3	-0.426553724350557	8.70607142857143	6.47763928571429	1.68736782093354e-06	1.1590316518798e-05
GRK7	-0.0593530315310367	3.840125	3.68534642857143	0.212977045227571	0.286683196040649
MMEL1	-1.00857290159473	54.5052178571429	27.0911464285714	4.631485550805e-11	2.20260963397048e-09
PDE8A	0.0506287521381061	7.22871071428571	7.48689285714286	0.889218712226143	0.905294858576127
NLRP6	-0.0557745298380405	8.08911785714286	7.78236071428571	0.617204893270792	0.667042919346878
ZCCHC5	-0.0288904791814053	26.7400785714286	26.209925	0.417272444368857	0.487939923758323
ATRIP	0.265192760825116	19.1797428571429	23.05015	0.0006320715269852	0.00202153993132655
ANGPT1	-0.0295177627450889	2.62422142857143	2.571075	0.385111226253876	0.457331736783053
TEDDM1	-0.153864440201236	7.14642857142857	6.42349285714286	0.000578937371946273	0.00188059118994612
LOC149373	-0.0871177028846883	11.9303714285714	11.2312714285714	0.111936170970526	0.169304258594142
GABRG1	-0.0403952346275722	2.91002142857143	2.82967142857143	0.230404426179144	0.305096287775574
PANX2	0.108341567141418	51.5453	55.5652321428571	0.012448681057184	0.0266235688970674
ZNF114	1.40230823867548	9.21647857142857	24.3613785714286	2.58588051633748e-11	1.41408241259044e-09
CCDC27	-0.140450204541687	19.0908035714286	17.3198642857143	0.0237331187607339	0.0460539145730251
C15orf26	0.0286205106773614	3.08047857142857	3.1422	0.509858600044535	0.571208975793674
LOC100652931	-0.0764386686442009	4.6065	4.36878571428571	0.110099957495506	0.167395622166858
C5orf17	-0.549268358921478	9.41000357142857	6.43048214285714	9.86365038608037e-05	0.000397684193409447
LINC00208	-0.0115910231512957	7.49580357142857	7.43582142857143	0.552622439769264	0.609376234516305
DNAH6	-0.0735723883827799	2.805825	2.666325	0.0579905315732151	0.0980234520514338
LRRC15	-0.0841524503346558	8.16611071428571	7.70340714285714	0.125474186799891	0.186593367665385
TTC40	-0.00359705135958199	12.0630964285714	12.0330571428571	0.928764737883781	0.938879777780485
B3GNT7	-0.112671290694877	12.2147142857143	11.2970714285714	0.0178585031460958	0.0361284296033673
ZNF645	-0.166984286579078	10.0782035714286	8.97668214285714	0.00486272930062306	0.0118943527726636
ZMYM6	0.0373798941612418	2.89011428571429	2.965975	0.417272444368857	0.487939923758323
SGCZ	-0.1512399876047	4.26462857142857	3.84019642857143	0.0170520460113386	0.0347326708121231
LOC100507431	0.791639892341261	2.15926428571429	3.737775	0.0429862384828333	0.0762673401566228
WNT9B	-0.234545205843863	5.69402142857143	4.83965	4.11480597869535e-05	0.000185083185817491
CNPY3	0.921147591105539	9.303425	17.6171607142857	2.0639970326987e-06	1.37836444313672e-05
SCAMP1	0.232773780412658	19.8967785714286	23.3805464285714	0.0579905315732151	0.0980234520514338
LINC00471	0.00885659813533746	3.21485	3.23464642857143	0.980548633022288	0.983476337471596
HAS3	-0.154718364366301	13.719225	12.3240857142857	0.00460567850246415	0.011336354285607
FGF4	-0.0661154440260536	5.48301785714286	5.23741428571429	0.0664481317892327	0.109990622253045
LOC142937	-0.109438819593145	10.5540107142857	9.783025	0.0541685377681678	0.0926283746596425
LOC439933	0.00548851526754723	2.19443214285714	2.20279642857143	0.80583181424561	0.831042282777635
C11orf65	1.07015382020197	2.50161071428571	5.252525	0.115681000737386	0.173961274682392
OR5P2	-0.121537437202539	8.98811071428571	8.26193928571429	0.0558096967385945	0.0949514118561681
DYDC1	-0.0437347671332242	2.90680357142857	2.82000714285714	0.143416830688969	0.207516093796708
IL27	0.0064098198250031	23.4898607142857	23.5944571428571	0.563577482016544	0.619069358035717
IQCF1	-0.0632646230536871	18.2005535714286	17.419675	0.212969226054467	0.286683196040649
DEFB125	-0.0796391588029719	4.60299642857143	4.35578928571429	0.0278967184391927	0.0527547361566111
DEFB105A	-0.000563983109985289	3.72816785714286	3.72671071428571	0.993515649184508	0.994549533309293
PKHD1	-0.164149206428498	11.0850928571429	9.89294285714286	0.0195348373378274	0.0390612619391242
PKD1L1	0.0922898955197744	4.80406071428571	5.12142142857143	0.209982143948719	0.28389779035244
TENM1	-0.0596923998411256	7.51050357142857	7.20609285714286	0.271010783922649	0.346780411158777
REXO1L1P	0.127795664108859	6.38691428571429	6.97848928571429	0.0303946036702291	0.0568334509165098
TAF1L	0.0598146999224158	4.65437857142857	4.85140714285714	0.179031284273333	0.248627801632426
CNTNAP5	0.0162031673336607	8.47663928571429	8.57237857142857	0.410892410318653	0.481437054566142
RECQL4	0.160589488667886	50.4056142857143	56.3405607142857	0.0128423284515789	0.0272846297581331
GPR113	-0.174859680732376	14.8483285714286	13.1534464285714	0.00112938905679819	0.0033550337744273
TMC2	-0.0495146883780704	37.632725	36.3630464285714	0.308334770195861	0.383795361819492
SMCR5	-0.034718113888712	4.61450357142857	4.50478214285714	0.308334770195861	0.383795361819492
BICD2	-0.0407253638668537	7.83061785714286	7.61266071428571	0.354512412522428	0.429305687011452
ZIM3	0.0403102752380373	2.78290714285714	2.86176071428571	0.209982143948719	0.28389779035244
NOX5	-0.00825999749083461	6.34332857142857	6.30711428571429	0.690340000198034	0.730958394165757
DAOA-AS1	-0.0404810721120918	2.68773571428571	2.61336785714286	0.0962539005931793	0.149543139536211
GPR126	-0.220702303872745	4.84087142857143	4.15418214285714	0.000121616340868071	0.00048192729944618
KLHL4	-0.144733897148424	7.27498571428571	6.58056071428571	0.0625610840991628	0.104390146084569
GPR156	-0.121500422522127	6.73557857142857	6.19155357142857	0.00985228261308966	0.0218237237744208
SUOX	-0.280673889158699	10.7595607142857	8.85733928571429	0.000240708133762785	0.00087227846486675
GPR115	-0.104214223761775	13.8542035714286	12.888725	0.143416830688969	0.207516093796708
IL31RA	-0.0237353878267594	4.98937857142857	4.90796428571429	0.856949791321863	0.876244307568468
SYTL5	-0.0936362935202593	4.43985357142857	4.16084285714286	0.122110209627572	0.181923151450074
SDCCAG8	-0.0591536521465135	11.1737357142857	10.7248535714286	0.357337187090213	0.431319619596771
GPR111	-0.0961855488963212	3.66485357142857	3.42848214285714	0.04052182309462	0.0726563360707196
SYN2	-0.192045823125516	6.47551785714286	5.66843214285714	0.000240708133762785	0.00087227846486675
ASB10	-0.028324462600974	69.0643464285714	67.7216285714286	0.563577482016544	0.619069358035717
HTR3C	-0.156258038513284	16.2059321428571	14.5423857142857	0.0413307869767211	0.0737320614337308
NFKBID	0.169265226480662	14.9654678571429	16.8284535714286	0.00865103871195174	0.0194747295246287
CD300LF	1.47480549207906	18.9080357142857	52.5541607142857	1.66572040431774e-10	5.80751909663531e-09
GJA10	-0.0401695998331904	9.41091071428571	9.15249285714286	0.431526791906524	0.500186301737198
WNT9A	-0.175046661177375	8.774075	7.77153928571429	0.000451767466284812	0.00151229909664433
GAL3ST2	0.00140543915707525	16.5004142857143	16.5164964285714	0.980548633022288	0.983476337471596
PIP4K2B	-0.203329082911415	49.3550428571429	42.8670285714286	0.0242447297160097	0.0470035924312856
ODF3	0.142601409171174	8.68785357142857	9.59046785714286	0.00541535202592637	0.0130292286180855
WFDC13	-0.0458873133389928	2.59784642857143	2.51651785714286	0.204084039717911	0.277572656333557
LINC00521	0.0902327161785625	6.06068214285714	6.45185	0.103324492276077	0.158178257381266
SLFN5	0.448815937090252	5.74455357142857	7.84085357142857	7.06921715457507e-05	0.000297308908271606
SERPINB12	-0.0642708697568803	10.6597535714286	10.1952928571429	0.531025678268812	0.590236156995949
GIPC3	-0.027824226923133	7.73649285714286	7.58871428571429	0.465855344089592	0.532547828237808
PGLYRP3	0.0206009487907575	4.49199642857143	4.5566	0.967586671597395	0.971995857550466
PSKH2	-0.0991836145618437	12.3527607142857	11.5320571428571	0.0930140810014942	0.145340968925541
OR6W1P	0.0737947551884996	11.6863142857143	12.2996285714286	0.0979044310247454	0.151646891149578
MOGAT1	-0.0556859984410525	11.9854535714286	11.5316464285714	0.236858748312585	0.311537706062103
GPR78	-0.0744779794490498	12.5518821428571	11.9203428571429	0.278220585564391	0.354036573405039
TAAR9	0.013232605569804	8.22321071428571	8.29898214285714	0.374687780781764	0.44728776538157
MYOZ3	-0.0739540869413164	6.64321071428571	6.31125357142857	0.162392035135763	0.229603329741993
BNIPL	-0.474302083615943	7.0457	5.0716	4.631485550805e-11	2.20260963397048e-09
ASB11	0.0135749410510657	4.10528571428571	4.14409642857143	0.496455690735154	0.560294769012475
OFCC1	0.00652786966302132	2.61693214285714	2.6288	0.960790708659313	0.966315643349351
SDR9C7	-0.0166706986711058	7.01742857142857	6.93680714285714	0.285557682443612	0.36124438003193
OR5P3	0.0736962339601464	7.48875357142857	7.88123571428571	0.0946200740187156	0.147344855374389
TRIM40	-0.219410251349794	6.44997857142857	5.53999285714286	0.000995323568921603	0.00299502810878542
CSN1S2AP	-0.0238006962525852	3.68142857142857	3.62119285714286	0.285557682443612	0.36124438003193
WFDC12	-0.243386892264361	120.905525	102.136128571429	0.00865103871195174	0.0194747295246287
CRYGN	0.127449811044583	5.04549285714286	5.5115	0.0174951965724415	0.0355702608379844
STARD6	-0.00504883657033206	3.17428928571429	3.1632	0.837695198339086	0.85975758312292
C11orf40	-0.114395760556331	3.25444642857143	3.00635714285714	0.00369413089215569	0.00940102117252175
C18orf12	-0.144828790916058	7.86083571428571	7.11002142857143	0.0171066625234064	0.034808083133785
BCL2L11	0.0145930016035027	56.8948928571429	57.4733107142857	0.755530573341063	0.787688729672246
DEFB119	-0.16636428819233	6.02398928571429	5.36788928571429	0.00243206001540613	0.00656781319601407
TIGD1	0.922157277268004	22.2750214285714	42.2099785714286	1.20866857904814e-09	2.67843488360165e-08
ALKBH5	0.201381533783771	46.737975	53.7392714285714	0.0899889089469014	0.141194786480077
CCDC69	-0.819706109852811	61.2700178571429	34.7129785714286	3.5387323154775e-08	4.23108429335878e-07
NFX1	-0.177490321645815	144.304392857143	127.599696428571	0.000933863225311252	0.00283630129696642
DSG2	0.659940397893999	11.4428535714286	18.0799071428571	0.0148182272591936	0.0308083449736039
KBTBD6	0.201934465453586	5.67959285714286	6.53289285714286	0.420252829793535	0.489936133802709
CDK8	-0.0794497502126434	6.46938928571429	6.12275	0.064953837068366	0.107678055293579
PTK6	-1.32175239735582	230.003425	92.012575	8.12005652233144e-11	3.39614142652372e-09
NKD1	-0.101047183721829	18.2217071428571	16.9891178571429	0.15748225616062	0.223842903292847
STK38	-0.257950424421947	7.10691428571429	5.94333571428571	0.00207867860838472	0.00569980246038427
THEM4	0.198066221662724	19.7990714285714	22.7126964285714	0.0914355778230612	0.14337960384332
CLSPN	0.0850578338682768	3.23015	3.42631785714286	0.0421498721638233	0.0751551928269906
RBAK	0.477157855236547	7.294075	10.1533428571429	0.0234195814702408	0.0454955574311278
WDR62	-0.0398342352609484	5.72566071428571	5.56973214285714	0.605706444123229	0.657240885508822
SLC39A12	-0.0363622482556694	2.91216785714286	2.83968571428571	0.420252829793535	0.489936133802709
RNF168	0.258179412429981	7.13633214285714	8.53482857142857	0.00412753986584361	0.0103264128361329
SVEP1	-0.327778030939177	3.56753928571429	2.84248214285714	9.0774386106162e-07	6.83407446874673e-06
LOC652276	0.0202857072823743	29.4533178571429	29.8703857142857	0.563577482016544	0.619069358035717
GATA4	-0.177786889493816	22.79695	20.1538285714286	0.0116560348410694	0.0251351808988742
TC2N	-0.0114583755994362	30.8034035714286	30.5597214285714	0.643000625732351	0.688654971780048
C9orf72	0.203825956228076	38.8648214285714	44.7625071428571	0.285557682443612	0.36124438003193
KCTD18	-0.129830867159321	43.2708035714286	39.5468571428571	0.0344938782855747	0.0632408446859412
KLF11	0.0708020260808127	3.60761071428571	3.789075	0.131653124489143	0.193780433548736
ANKLE1	0.0540858556023136	4.14536071428571	4.30371785714286	0.177802061220675	0.247164018760716
PLXNA3	0.0330608947327713	6.84607142857143	7.00476785714286	0.666506966112184	0.710307529652138
PELO	-0.0591489208229787	6.95351428571429	6.67419285714286	0.301873659880674	0.377393936248905
LACC1	-0.00272762905615798	7.05829285714286	7.04496071428571	0.954633130705365	0.960624836913016
TAPT1-AS1	-0.35418428645527	19.8548928571429	15.5327178571429	0.000205886334300015	0.000765221723356378
C3orf30	-0.0458291252581771	3.19539642857143	3.09548571428571	0.228414466150285	0.303601014140088
RANBP3L	-0.0101242054580348	3.07092857142857	3.04945357142857	0.682037067839842	0.724128789858953
SNX13	0.0553551249901134	6.75401071428571	7.01819285714286	0.52038757077133	0.580668678700499
KDM1B	0.0295860004790258	3.01704642857143	3.07955714285714	0.407925696454452	0.479660601959416
ATP6V0D2	0.120836520534253	6.11015	6.64396428571429	0.219059110297194	0.293303046388683
CEP19	0.688741753642752	9.43501785714286	15.2080892857143	2.22748557750605e-09	4.37699881864072e-08
DNAH11	0.0862599837687723	14.9472	15.8681642857143	0.143416830688969	0.207516093796708
PROSER3	-0.133547797247767	65.6186785714286	59.8171321428571	0.0477476093332648	0.0832152397529344
ADPRHL1	-0.0608246757677842	18.0750321428571	17.3288214285714	0.172550789422498	0.241338467817614
SYNRG	-0.0654588611527682	8.55799642857143	8.178375	0.410892410318653	0.481437054566142
CDH24	-0.0790871632604286	21.8564321428571	20.6905321428571	0.152683954875419	0.218431050971979
SEPSECS	0.152872881866268	13.9393178571429	15.4974714285714	0.43933887306239	0.507268731006567
GRIK5	-0.178161654819945	25.8022142857143	22.8047321428571	0.00256784669321588	0.00688762225203139
ZNF777	0.483205185930236	42.3454928571429	59.1924678571429	3.91681682051847e-10	1.10081798635634e-08
JPH2	-0.0729900363949003	15.6344321428571	14.8631178571429	0.263927981321902	0.339544551289691
PDE5A	-0.168912407840458	6.53121428571429	5.8096	0.00135682439483802	0.00393204593068205
SH2D1B	-0.305431294126036	5.48198214285714	4.43602142857143	2.73588357697715e-08	3.43413429060305e-07
SSTR3	-0.0785832937148463	31.4616928571429	29.7938178571429	0.0583961600532295	0.0985909800723172
ADAMTS19	-0.0280818915170133	6.1892	6.06989285714286	0.374687780781764	0.44728776538157
DDX31	-0.117162682623256	15.7915392857143	14.5597857142857	0.0148182272591936	0.0308083449736039
UMODL1	0.499185846787341	5.158825	7.29156428571429	0.0899889089469014	0.141194786480077
RASEF	0.928547012532349	749.633685714286	1426.82134285714	3.47400717154884e-09	6.31618675012784e-08
PARD3B	0.00165294902307878	5.582725	5.589125	0.954633130705365	0.960624836913016
ZNF441	-0.107114018016541	3.01245357142857	2.79689285714286	0.0062024424921096	0.0146815278565238
NEGR1	-0.347277632195216	8.87762142857143	6.97839642857143	1.48332037644091e-05	7.54785023482062e-05
FCRL3	0.0657106314925389	7.82336428571429	8.18793571428571	0.228414466150285	0.303601014140088
STOX1	0.135409008510055	4.03775714285714	4.43508928571429	0.954262477605578	0.960624836913016
C20orf166-AS1	-0.227564403226752	26.1876214285714	22.3662071428571	7.22397573816185e-05	0.000301778520621238
RNFT2	-0.042743436679852	7.26057142857143	7.04861428571429	0.365949367121097	0.439359304270935
ANKFN1	-0.210089123983101	8.16628928571429	7.059625	0.00482359393661829	0.0118548041436132
KRT78	-2.94848127997283	667.762014285714	86.5048392857143	8.82754493864443e-10	2.09907116333182e-08
CCDC7	-0.051114220555887	2.63773214285714	2.54591428571429	0.152683954875419	0.218431050971979
ZNF41	0.0278379298221081	8.13926785714286	8.29784642857143	0.954262477605578	0.960624836913016
ZNF512	-0.0383166690003929	45.6691	44.4721357142857	0.0440926207307084	0.0778063981092289
AMMECR1	0.076384162427662	6.65801785714286	7.02002857142857	0.140248616254364	0.20405780957879
FAM117B	0.678021880760195	23.8319178571429	38.1297464285714	0.000133719111191178	0.000519724067977759
ZNF583	-0.333061024233959	18.1898892857143	14.44005	7.11996454171746e-06	4.03967317952725e-05
LUZP1	-0.0434607449157838	5.99376785714286	5.8159	0.501665286016346	0.564120215088413
ZNF75D	0.0382421917243998	4.06124642857143	4.17033928571429	0.501665286016346	0.564120215088413
LINC00052	-0.0576985159086032	7.23224642857143	6.94871071428571	0.130320502774485	0.192019271754956
BRWD1	-0.505581325284684	18.7017678571429	13.1730857142857	6.62359416067414e-08	7.11910224592924e-07
ZNF572	0.140902321502716	6.39991785714286	7.05651428571429	0.0406728541997739	0.0726563360707196
RMDN2	-0.114595805520597	5.30969642857143	4.90425357142857	0.0110995518835613	0.024102176945599
ADAMTS18	-0.0725478771322781	9.65313214285714	9.17971428571429	0.324158563692514	0.399567108359524
PCDHAC1	-0.0543529841284709	18.7254428571429	18.0330928571429	0.410892410318653	0.481437054566142
HIPK4	0.0451310415376689	27.4751535714286	28.3482285714286	0.367433352550691	0.440591083915818
FAM124A	0.0400983785255402	20.8618071428571	21.449775	0.43933887306239	0.507268731006567
ITIH5	-0.995051886168307	54.8189607142857	27.50365	2.9995277881575e-09	5.61264426001567e-08
FANCB	0.26570446696533	3.88865357142857	4.67502857142857	0.00330180625101546	0.0085350098558984
POMK	-0.174671145927005	20.5771607142857	18.2307357142857	0.00460567850246415	0.011336354285607
ZNF709	-0.107352080016738	3.54778571428571	3.293375	0.0483081375431009	0.08411593835977
CCDC57	0.0225853414746284	9.82914642857143	9.98423214285714	0.46086678377097	0.527206688915948
SMC1B	0.0252204277483399	6.27500357142857	6.38566428571429	0.455900698025692	0.523591820280985
BRWD3	0.0634846201482873	32.6360535714286	34.1042428571429	0.980548633022288	0.983476337471596
ASB16	-0.225793254709241	66.5788892857143	56.9332535714286	1.86679577895077e-06	1.26260783221269e-05
MAGEE2	-0.13522901193561	7.12060714285714	6.48349285714286	0.00247896791815934	0.00665850971595458
ERVV-1	-0.0676687837206558	13.6643071428571	13.0381892857143	0.0464770552817516	0.0814435638757729
GAL3ST3	0.0601871036685049	16.8036928571429	17.5195464285714	0.173788533615977	0.24287702152248
FLJ30679	-0.146817276316547	13.096	11.8288428571429	0.00685361695974759	0.0159528261899624
UTS2R	-0.0361190127927609	49.8310071428571	48.5989357142857	0.478942394730693	0.543769200626913
USH1G	-0.266521714048138	57.3171464285714	47.6489714285714	0.000321866541518713	0.00112430212821209
SYN1	-0.120780857903474	24.63695	22.65835	0.122110209627572	0.181923151450074
SLC23A3	-0.0863504219387639	7.07289642857143	6.66197857142857	0.117577452227081	0.176631205124481
CNOT6L	0.0049855083380117	2.52871428571429	2.53746785714286	0.799495301988954	0.826359906031367
RHBDL3	0.0183086164115998	8.06599285714286	8.16900714285714	0.600008853344491	0.651412679594186
ZNF718	0.18108406957229	5.75547142857143	6.52518214285714	0.574634438977333	0.628832340455934
DIP2B	-0.0312191310746239	2.93512142857143	2.87228928571429	0.431526791906524	0.500186301737198
SLC36A1	-0.157455817057549	25.29605	22.6805607142857	0.0133423893201989	0.028299269852107
SNRNP48	0.780516458875735	42.441525	72.9037464285714	6.56910250455216e-06	3.73915858805372e-05
ZNF560	-0.0808960920480952	2.6198	2.47694285714286	0.0199668205451088	0.0398226202239315
RTTN	0.027894340094889	2.65895	2.71086071428571	0.850522450368009	0.870766127286448
BTNL9	-0.0307999961598888	47.7486642857143	46.7400857142857	0.410892410318653	0.481437054566142
PUS10	0.0402837041179986	9.6905	9.96489642857143	0.308334770195861	0.383795361819492
PLCXD2	0.11246001916771	14.3260571428571	15.4874714285714	0.398680663246795	0.470990264500676
LMLN	-0.066078378736631	6.6272	6.33050714285714	0.340493222176202	0.41503617445657
RAD9B	0.00309324312592585	3.45599642857143	3.46341428571429	0.890108936221332	0.905294858576127
ZNF555	-1.21258993212181	65.8186678571429	28.4003142857143	1.41120546815253e-09	3.04127712041874e-08
NYAP1	-0.287265325673602	10.7307964285714	8.79339285714286	7.34327198624244e-07	5.69877759607073e-06
SGK494	0.594265175616469	17.4557107142857	26.3529464285714	2.49295737096546e-05	0.000119498203492054
MRGPRX3	-0.0929669230283823	4.78285714285714	4.48437142857143	0.0558096967385945	0.0949514118561681
ABCA13	0.748700784838452	2.50403571428571	4.20747857142857	0.000342886695649744	0.00118939700705385
GPR128	-0.0232467651010024	3.12158928571429	3.07169285714286	0.40791768442692	0.479660601959416
CSF3R	0.577539818469493	56.9444392857143	84.9783178571429	1.91572162672435e-09	3.8722461114009e-08
DUSP5P1	0.504533666774389	3.33524642857143	4.73159642857143	5.98417906346603e-06	3.45170840883433e-05
DGKH	0.42317711317193	9.00858571428572	12.0794071428571	0.000720992938356498	0.00226418957626333
C16orf46	-0.156232283620367	19.4801285714286	17.4807964285714	0.00669007800419259	0.0155910275082841
LSM14B	0.432956926504111	45.0779214285714	60.8550892857143	0.000483531432786195	0.00160391468840976
CASP8	0.00926565830512338	10.1326035714286	10.1978892857143	0.743106469672996	0.777070966384505
PLB1	0.0318115380022945	4.08195714285714	4.17296428571429	0.571831933856215	0.627290027793856
C20orf197	0.177561465540773	2.53009285714286	2.86146071428571	0.0186953036450909	0.037560210754793
SLC5A3	0.439351219656003	13.87575	18.8154392857143	3.20990061785988e-05	0.00014841845483017
SLFNL1	0.0302950350852109	3.43966071428571	3.51265357142857	0.577403728217804	0.631452585172815
GPR82	0.0686151953078009	5.88246071428571	6.16899285714286	0.172550789422498	0.241338467817614
RIBC1	-0.179689085481238	8.19523928571429	7.23552142857143	0.0204777832924603	0.0406196764287503
OXGR1	-0.0237655678581179	4.53300714285714	4.45894642857143	0.192651282920944	0.264796979960768
CDC14C	-0.0194912848398567	2.20734642857143	2.177725	0.594317120149389	0.647465591246806
SULT1C4	0.0318209852046183	3.65011071428571	3.73151428571429	0.528103264086197	0.588502415768321
TEAD1	-0.25205619218156	5.7496	4.82793214285714	4.09739865472976e-06	2.49390991458286e-05
CATSPER2	-0.0755229939446806	10.8813035714286	10.3263357142857	0.0727461405471135	0.118342050611331
POU5F2	0.113402904983664	7.93981428571429	8.58910714285714	0.0141321966428457	0.029591340412837
RXFP2	-0.0698836120177679	4.04717857142857	3.85580714285714	0.0374188968481714	0.0677248010999958
BEND7	-0.2691871162112	5.739425	4.7625	5.98417906346603e-06	3.45170840883433e-05
SLC18A2	-0.0659654055047367	6.88920357142857	6.58129642857143	0.243437706970906	0.318213229933619
SSMEM1	-0.110531235917913	3.86928214285714	3.58391071428571	0.00458297822779065	0.0113358541648824
MAB21L3	-2.0923889221251	44.5475607142857	10.44605	1.23432308780556e-08	1.80900135091614e-07
LOC285696	-0.260847791903949	8.93896428571429	7.46043571428571	9.86365038608037e-05	0.000397684193409447
SDE2	0.395450035302375	17.6158821428571	23.1711035714286	0.000342886695649744	0.00118939700705385
SLC35G3	-0.0324616381844569	23.4291607142857	22.907875	0.070175446604095	0.114858698877221
UROC1	-0.0175795396247853	5.68183928571429	5.613025	0.420252829793535	0.489936133802709
PCDH15	-0.0803020856090744	2.73013571428571	2.582325	0.0898677551761389	0.141194786480077
TNRC6A	-0.0621038544313035	9.09798571428571	8.71465357142857	0.114303394165651	0.172122010155662
KCNA6	-0.0925559944712777	7.54186071428571	7.07320714285714	0.131653124489143	0.193780433548736
ARID2	0.110271107004147	17.4256678571429	18.8098071428571	0.293022308659156	0.368879371730041
AMER3	-0.0836368725835994	16.6393678571429	15.7021678571429	0.0477476093332648	0.0832152397529344
OTUD7A	0.0961971113797198	7.84308214285714	8.38387857142857	0.585791328686825	0.638861215614495
ERVW-1	0.0506597717905337	8.78365	9.09756428571429	0.183169400430186	0.253343835128686
LINC00889	-0.12582305007634	3.50177142857143	3.20930714285714	0.00195879736117845	0.00541034045348728
FBXL18	0.119090225321624	119.058167857143	129.303096428571	0.0291230192157034	0.0547314142315896
C6orf195	-0.0658075183690707	5.67468928571429	5.42165714285714	0.10828159502452	0.164798721279042
PNPLA1	0.351069862453708	5.609325	7.15472857142857	0.000258570845708071	0.000929212906727782
DEPDC4	-0.131682368611431	5.74201428571429	5.24111785714286	0.0496669167368866	0.0860570622975873
ANKRD23	0.0217662477445844	22.1421714285714	22.4787678571429	0.597046099904736	0.648428954751305
COX6B2	0.0766008558952764	22.3160071428571	23.5329107142857	0.172550789422498	0.241338467817614
FAM129C	-0.0541759275499345	23.5038178571429	22.6375714285714	0.0995774968802707	0.153688002961255
EPHA10	-0.08338530423686	5.59965714285714	5.28518214285714	0.4016549257086	0.473075645189843
WDR64	-0.0640179603966002	7.63372142857143	7.30238928571429	0.294281427338389	0.370112191523286
HEATR9	0.0751670903186894	4.722525	4.9751	0.0883324703591216	0.139401944087255
PARP15	0.0754989845768235	3.76285	3.96501071428571	0.0699619321827051	0.11463335171745
ARHGAP42	0.0218674404562342	2.95155714285714	2.99663571428571	0.850514876922921	0.870766127286448
LINC01101	0.00133379361132935	13.1784214285714	13.1906107142857	0.749310389229644	0.783210143096111
MFSD2A	0.00348116695306189	22.7882571428571	22.8433107142857	0.941691369336166	0.949452808445035
ATM	0.0817559668689363	6.16268928571429	6.52200714285714	0.0625610840991628	0.104390146084569
FAM26D	-0.000613191585517647	3.31137857142857	3.30997142857143	0.889218712226143	0.905294858576127
NPHP3	0.337121426437179	4.71635714285714	5.95786071428571	7.48800054669564e-08	7.94726958724773e-07
ATG9B	-0.0285753324172875	4.43532142857143	4.34833571428571	0.549753319026476	0.607700678535247
CXorf58	-0.029921393876311	5.22777857142857	5.12047142857143	0.43933887306239	0.507268731006567
EFCAB3	-0.164825255487815	4.66986785714286	4.16569285714286	0.224074100898975	0.298544459665387
TFAP2B	-2.11242355642553	44.7018892857143	10.3376785714286	7.48441831263361e-12	5.88820612454517e-10
CCDC13	-0.106442709768273	12.1602821428571	11.2953892857143	0.877276057684585	0.894219882900437
CRHR1-IT1	-0.194869390499129	39.6681285714286	34.6561392857143	0.0244770832040105	0.0472032542232982
MRGPRX1	0.0919504233631629	4.20593214285714	4.482725	0.00704748076621936	0.0162983100705388
HFE	0.0384908505257062	3.83164642857143	3.93525	0.682042204236569	0.724128789858953
RLN3	0.116387504575227	5.17360714285714	5.60827857142857	0.0344938782855747	0.0632408446859412
CSMD1	-0.195794740364955	9.3394	8.15415357142857	0.00036758045305068	0.00126427842156859
MACF1	0.573012017002931	12.9094285714286	19.2044035714286	9.54495369347815e-08	9.8105806223933e-07
ADAMTS20	-0.0504709804623824	2.92693571428571	2.82631071428571	0.301873659880674	0.377393936248905
AGBL4	-0.103355937132654	11.284	10.5038821428571	0.0440926207307084	0.0778063981092289
FLJ13744	2.15781509302958	8.47769285714286	37.8307321428571	1.64537443817492e-09	3.42726960975353e-08
SLC17A8	-0.0127028407224279	2.25457857142857	2.23481428571429	0.700165345520955	0.740472700377791
C11orf44	-0.0991162497905314	5.43342142857143	5.07266785714286	0.121482075436149	0.181613814810343
SATB2-AS1	0.0118142417171647	3.73316428571429	3.76386071428571	0.608396633829791	0.658391182334827
RBFOX1	-0.163388050045072	20.1562535714286	17.9980357142857	0.000821172578610194	0.00253774463801512
C12orf40	-0.135045908678421	4.78986071428571	4.36184285714286	0.00344344894034332	0.00888487075402166
WDR65	-0.000869625203720137	9.81466785714286	9.80875357142857	0.714479022269836	0.751965364446814
C5orf64	-0.0586766541640831	4.21755	4.04945714285714	0.0413273158984391	0.0737320614337308
ADAMTS15	-0.00590834464601864	11.7157821428571	11.6679	0.751213816531547	0.783844689836167
LY86-AS1	0.0503087919263037	3.30537857142857	3.422675	0.285557682443612	0.36124438003193
FLJ31713	-0.0752324711310655	8.16811071428571	7.75308214285714	0.0625610840991628	0.104390146084569
EDARADD	0.011080000677735	11.4592178571429	11.5475642857143	0.928764737883781	0.938879777780485
LOC101060424	0.0201391513500835	14.2089535714286	14.4086928571429	0.902970204994289	0.916437677359205
CCDC171	-0.0966702935218535	3.54596428571429	3.31614642857143	0.0178875054080224	0.0361456389716393
CYP4Z2P	-0.0575664656235282	4.91545357142857	4.72317857142857	0.122110209627572	0.181923151450074
C18orf15	-0.0407871972874205	8.35599285714286	8.12306428571429	0.449062510297533	0.516326736141839
MUC19	-0.161393397345432	5.04206071428571	4.50841428571429	0.00220512421997605	0.00599987707217191
KLHDC7A	-0.201610466608002	19.6454928571429	17.0833142857143	0.00107840575363698	0.003219396383724
AQP4-AS1	-0.0796050754905169	2.64414285714286	2.50219642857143	0.0108281343939431	0.0236731206796506
CNTNAP4	0.0166834335844415	2.06986428571429	2.09393928571429	0.380643727386553	0.453630093630005
FER1L6-AS1	-0.0112029047397559	5.10468571428571	5.0652	0.788511973651229	0.815764513999851
C1orf127	-0.0320897692188939	31.4097428571429	30.7188107142857	0.678383919143819	0.720678624609239
LOC100996634	-0.00193941502852368	4.69492142857143	4.68861428571429	0.877276057684585	0.894219882900437
AGBL1	0.369182180896592	4.83549285714286	6.24562142857143	0.166140705929558	0.234433641791388
FLJ34503	-0.0545167391183501	4.56966428571429	4.40020714285714	0.199978177267646	0.272548825702936
LINC00304	-0.0330574375545032	7.598125	7.42600357142857	0.33772039097752	0.413414661019714
CCDC79	-0.0888579270056571	6.99204285714286	6.57438571428571	0.0754034737607382	0.121944346263068
MYO1H	-0.155446237531984	9.22861785714286	8.28595714285714	0.0227356144576975	0.0444324016049055
LINC00269	-0.0624294671637333	18.3691607142857	17.5912285714286	0.236858748312585	0.311537706062103
VSTM4	-0.167840356913229	14.8669571428571	13.2341821428571	0.000319722690398389	0.00111747172533462
C2orf61	0.159991612770689	6.78442857142857	7.58011071428571	0.108287625483455	0.164798721279042
FAM9B	0.0253227976607771	5.12357142857143	5.21429642857143	0.325495684917065	0.400795088142192
FLJ40288	-0.113196496155247	52.7761535714286	48.793525	0.0496669167368866	0.0860570622975873
CES5A	-0.0246738390167014	10.3424357142857	10.1670571428571	0.501665286016346	0.564120215088413
CHDC2	-0.230726291651782	9.77295	8.32856428571429	0.000439692978951398	0.00148432325945899
DCAF8L2	-0.0989062304560213	6.56473214285714	6.12975714285714	0.230404426179144	0.305096287775574
HYDIN2	-0.0906024311444713	5.27222857142857	4.95131071428571	0.0558096967385945	0.0949514118561681
DNAH17	0.476442831595762	5.04468928571429	7.01872142857143	0.652239336737719	0.697813991524063
SLC35G3	-0.0562674500826819	4.37478571428571	4.20744642857143	0.00833053610375298	0.0188600470121483
FLJ32955	-0.121487115112099	3.624125	3.33143928571429	0.000143604376433954	0.000554891089096949
LOC100288966	0.0465759197265505	2.61543214285714	2.70124642857143	0.309628755090449	0.384998433841314
KIRREL3-AS3	-0.123221072005637	7.96673214285714	7.31453928571429	0.0406728541997739	0.0726563360707196
TMEM145	0.0401265358586138	6.9752	7.17192857142857	0.47088150798895	0.53638117169062
C15orf32	-0.0718451602015353	3.69643571428571	3.51686428571429	0.0594948628308172	0.100349867066915
TSGA10IP	-0.0698095252200828	25.1902642857143	24.0003714285714	0.117589994282418	0.176631205124481
CCDC140	0.116151809497676	6.11419642857143	6.62681071428571	0.0664341996671432	0.109990622253045
C17orf78	-0.156216929242102	5.83588571428571	5.23697857142857	0.0170520460113386	0.0347326708121231
TEKT5	-0.191976120391271	12.687075	11.1063392857143	0.000875871231458095	0.00268133413443478
KSR2	0.0456404751844666	7.25235357142857	7.48545357142857	0.301881921669694	0.377393936248905
PAX1	-0.0554537565504187	5.04209285714286	4.85196428571429	0.294281427338389	0.370112191523286
TDH	-0.22064207106295	12.5570142857143	10.7762214285714	0.000240708133762785	0.00087227846486675
LINC00615	0.0295881454369009	2.67193214285714	2.72729642857143	0.577416738093102	0.631452585172815
SERPINA9	0.0665278610457891	28.7585071428571	30.1157178571429	0.183169400430186	0.253343835128686
FBXL21	-0.0180061411568762	5.52068928571429	5.45221428571429	0.166140705929558	0.234433641791388
AKAP2	-0.0197141321908829	3.57199285714286	3.52351428571429	0.776021529903408	0.804848989823368
MRGPRX4	-0.113163608086139	6.69576785714286	6.19062857142857	0.00174842267425428	0.00490480766904074
A2ML1	-2.22121074703297	132.171214285714	28.3456107142857	2.58651748810876e-09	4.98983314501784e-08
CPO	-0.25271685910472	7.61855714285714	6.39436428571429	5.35824830889864e-05	0.00023299077247015
GPR6	-0.203495483218539	30.184075	26.213175	0.000180738627506061	0.000678599943778944
MDS2	0.0186632339756829	4.8616	4.9249	0.724591495844761	0.761931102814688
RQCD1	0.457771818475919	40.7716178571429	55.9965142857143	0.00036758045305068	0.00126427842156859
GJD3	-0.172006002344165	29.60725	26.2796214285714	0.000125742613918398	0.000492378921581401
HOXC12	0.0449523814988635	7.72555714285714	7.97006428571429	0.363094141511427	0.437445139292174
VNN3	0.0154335258888803	3.05103571428571	3.08385	0.941691369336166	0.949452808445035
MYEOV2	-0.0627267352484755	5.10290357142857	4.88578928571429	0.110081720487312	0.167395622166858
FERD3L	-0.0136857312720151	18.9114428571429	18.7328928571429	0.908675124423906	0.921874000871674
LINC00314	0.0425489255748746	2.40188214285714	2.473775	0.354512412522428	0.429305687011452
DEFB104A	-0.83752952937863	11.1309535714286	6.22889285714286	2.73588357697715e-08	3.43413429060305e-07
NLRP14	-0.0243733237014672	14.3932535714286	14.1521321428571	0.509858600044535	0.571208975793674
DGKB	-0.0449172693031961	4.33155714285714	4.198775	0.187114620971053	0.258344645329488
NLRP13	-0.0563937581941598	16.3841107142857	15.756025	0.531025678268812	0.590236156995949
NLRP8	-0.131042904481031	16.8330214285714	15.3714285714286	0.00956681342523425	0.0212158097577525
NLRP9	-0.172297615981431	13.7741357142857	12.2235571428571	0.00541535202592637	0.0130292286180855
TAF5	0.364163909785654	19.1073071428571	24.5936928571429	0.000483531432786195	0.00160391468840976
TAS1R2	-0.155272393162008	12.6692607142857	11.376525	0.0121681822192854	0.0261845057823533
ITGB1	0.626014457103921	44.6399285714286	68.8926071428571	0.0291230192157034	0.0547314142315896
PCSK6	-0.142656610505342	16.7268785714286	15.1520357142857	0.000875871231458095	0.00268133413443478
ZNF341	-0.082585376309948	6.65650714285714	6.28616428571429	0.031712744289654	0.0588561613085984
JPH1	0.232058255493918	5.22534285714286	6.13721428571429	0.000208339073753038	0.000769472917597826
NLRP10	-0.0555135711789689	7.37803214285714	7.099525	0.541771224709468	0.599974067426817
RANGAP1	0.142118832561403	23.277	25.6867428571429	0.114303394165651	0.172122010155662
MBNL2	0.0642777994820434	10.0366892857143	10.493975	0.243437706970906	0.318213229933619
KRT73	0.0922728526297134	5.98538928571429	6.38071428571429	0.0330787325559912	0.0610380344478544
COX1	-0.356436842126916	5126.16606071429	4004.00388214286	1.9375578244107e-07	1.80796015158746e-06
KRT74	-0.0201328402427485	15.3623392857143	15.1494464285714	1	1
SLC29A2	-0.0740371550955774	10.0322392857143	9.53038571428571	0.43933887306239	0.507268731006567
LMX1A	-0.21738792816097	6.54288928571429	5.62767857142857	6.59999939767562e-05	0.000279911397300619
CCDC125	-0.349255988099665	23.6150178571429	18.537525	0.000144130620269618	0.000554891089096949
GPR101	-0.228176751740993	22.9824821428571	19.6204464285714	8.44889926173444e-05	0.000346452344654303
ILDR1	-0.122413145104696	9.06301785714286	8.32573928571429	0.0440926207307084	0.0778063981092289
VN1R2	-0.14013057415596	12.0149857142857	10.9028428571429	0.00184518041301956	0.00513877524420752
VN1R5	-0.0602255672629433	5.98294642857143	5.73832857142857	0.337736902819536	0.413414661019714
ND2	0.105850211060128	5633.42271428571	6062.28611071429	0.113796455706738	0.171982745991694
TAAR8	0.162421969567869	8.01659642857143	8.97188928571429	0.000451767466284812	0.00151229909664433
TAS2R39	-0.00982229910096377	5.94573571428571	5.90539285714286	0.751213816531547	0.783844689836167
TAS2R38	-0.112491546443664	16.3542678571429	15.1275214285714	0.0170520460113386	0.0347326708121231
TAS2R40	-0.0195203744106003	3.49081071428571	3.44389642857143	0.743106469672996	0.777070966384505
TAS2R41	-0.0703637142368931	9.39416071428571	8.94697857142857	0.184390758558079	0.254766705188002
TMEM171	-0.195082765325186	18.5526071428571	16.206125	0.0110851418139336	0.024102176945599
VN1R4	-0.144683200716751	11.910325	10.7738178571429	0.0163631730223055	0.0335556037471949
TAS2R50	-0.120909418418952	3.38661071428571	3.11435357142857	0.0116560348410694	0.0251351808988742
MACROD2	-0.341092533423238	10.0861	7.96240357142857	8.660621868979e-06	4.73603980912668e-05
PIANP	0.00178982517196147	20.6480678571429	20.6737	0.980548633022288	0.983476337471596
ATP6	0.0440263402805527	7883.55351785714	8127.84231071429	0.265140199469387	0.3407933216745
HIST1H1T	-0.108409940621152	13.993125	12.9801607142857	0.0579905315732151	0.0980234520514338
COX2	0.241548285291998	6738.15281071429	7966.25373571429	0.000193703453580238	0.000721207985242536
CYGB	-0.190147773803388	37.9795392857143	33.2896714285714	0.000467620453763771	0.00156166193198717
EFNA2	-0.0707551383635789	4.95577142857143	4.71858571428571	0.111936170970526	0.169304258594142
IFNE	0.185155880940852	3.91577142857143	4.45199642857143	0.119523623699752	0.17890080262804
SPAG11A	-0.0251624447663725	2.89162857142857	2.84163214285714	0.374687780781764	0.44728776538157
SREK1IP1	-0.562617310905125	637.773721428571	431.819185714286	9.0774386106162e-07	6.83407446874673e-06
THRSP	-0.127948958025675	10.8590321428571	9.93744285714286	0.106888569141769	0.162833486088919
CXorf36	0.0356929870856848	13.4841	13.8218642857143	0.541771224709468	0.599974067426817
MAGEA10-MAGEA5	-0.00207463379015049	6.33266785714286	6.32356785714286	0.863386632142691	0.882612853639058
FBXL19-AS1	0.0717562739726993	8.416175	8.84536071428571	0.152683954875419	0.218431050971979
POLE4	0.774942240025791	76.7773714285714	131.375414285714	1.52421098989688e-06	1.06003539859309e-05
PDZK1IP1	0.0906805383147198	298.047607142857	317.382664285714	0.31618275443615	0.391743787373821
FAM27E2	-0.0513541735424763	15.5878892857143	15.0427821428571	0.491289719125688	0.554752124952349
BCRP3	-0.098571412157674	6.50423928571429	6.07468214285714	0.0397263231626667	0.0713206801061686
TAL2	0.0166318603427613	8.77746428571429	8.87923928571429	0.788511973651229	0.815764513999851
INSL3	-0.340427371158824	28.8619357142857	22.7953678571429	2.9995277881575e-09	5.61264426001567e-08
SYCP3	-0.154041576809973	4.4922	4.03727142857143	0.000821172578610194	0.00253774463801512
TMIE	-0.196637187044535	14.2444964285714	12.4294928571429	9.13096238235293e-05	0.000371113034180401
MUCL1	2.72945010650305	15.2822785714286	101.3525	2.22748557750605e-09	4.37699881864072e-08
ATL2	0.347181587182902	15.2216571428571	19.3630607142857	0.00541535202592637	0.0130292286180855
LINC00189	-0.0184341621263431	3.18343571428571	3.14301785714286	0.967321569841671	0.971995857550466
KLHL35	0.235021379699258	16.51345	19.4350785714286	0.000240708133762785	0.00087227846486675
ZNF354B	0.0679078350865314	23.5759214285714	24.712175	0.383551914777674	0.455914916447984
FOXC1	-0.00523917327484469	159.349778571429	158.772146428571	0.928764737883781	0.938879777780485
FLJ25694	-0.0464151012369824	5.27246071428571	5.10553214285714	0.509858600044535	0.571208975793674
TRIM43	0.0227297642901552	4.98610714285714	5.06528571428571	0.489134496939558	0.552849463722061
TRIM42	-0.000757417976951169	3.23893214285714	3.23723214285714	0.788511973651229	0.815764513999851
MGC15705	-0.0862852291061986	6.74077857142857	6.34944285714286	0.115681000737386	0.173961274682392
FAM98B	-0.00392774023388043	2.12278571428571	2.11701428571429	0.761762697969721	0.793681938208304
EFCAB13	-0.24740787773768	9.04384642857143	7.61861428571429	0.000451767466284812	0.00151229909664433
FAM71B	-0.0468442618263412	14.3583857142857	13.8996571428571	0.392541182812519	0.464409048069171
C10orf107	-0.0349863194641056	2.96816785714286	2.89705357142857	0.301890183185641	0.377393936248905
LOC101929373	-0.321409381684574	12.5235142857143	10.0224142857143	0.000114947328822346	0.000455890239855193
TMCO5A	-0.104205831154338	2.81775714285714	2.62140714285714	0.0195327535348201	0.0390612619391242
PPARGC1B	0.151285204033434	46.1332964285714	51.2337178571429	0.0838523369379733	0.133175760346591
XKR6	-0.0521648312409342	12.7475964285714	12.2949035714286	0.230404426179144	0.305096287775574
C9orf163	-0.163636263971711	33.1137285714286	29.5630107142857	0.0082227109763134	0.0186313953310193
SYNE3	-0.00149413522065256	12.407125	12.3942821428571	0.993515649184509	0.994549533309293
CCDC141	-0.11048654926256	3.21215714285714	2.97534285714286	0.0305335200736926	0.0570377690281187
HDX	-0.0735676063961312	3.51253214285714	3.33790714285714	0.250141887746753	0.325209041060605
CDYL2	0.0731146108474254	42.82175	45.0478535714286	0.144715578793089	0.209209358152752
C18orf54	0.0286291059413741	2.883175	2.94096071428571	0.431511048788501	0.500186301737198
SYT14	0.20183552469964	2.60368571428571	2.99465714285714	0.0292900028697893	0.0550018906568496
TECTB	-0.0956314913188252	16.789825	15.7129678571429	0.0602404893106144	0.101244399244007
VWA3A	-0.0691933224956687	38.7413285714286	36.9271035714286	0.147995900098742	0.213020283873337
LINC00896	0.0670058155609516	11.647925	12.2016714285714	0.207010086402371	0.280194340237592
HUS1B	0.175192636025579	6.67186785714286	7.53330714285714	0.00010996040323872	0.000438908339068471
NPB	0.173040745002698	43.0228321428571	48.5053285714286	0.00460567850246415	0.011336354285607
CCDC34	-0.0535764437207376	4.79286071428571	4.61813571428571	0.301890183185641	0.377393936248905
LRCH3	0.0593800617051863	9.08065357142857	9.46220357142857	0.134580461474354	0.197061254146665
INTS4	0.292217170611382	4.22068928571429	5.16832142857143	9.61394136157756e-05	0.000390068713640847
ENAH	1.73829471456595	14.6069285714286	48.7346392857143	1.3960428728727e-10	5.07636689323109e-09
STK35	-0.0183788062775787	8.10922857142857	8.00657857142857	1	1
KLC4	-0.0652848605473175	11.9492357142857	11.4205607142857	0.14698604088471	0.212303138359481
TIPRL	0.345292441670237	80.0873964285714	101.743707142857	0.00742161470814237	0.0170628606266613
VKORC1L1	0.211861719340334	4.21969285714286	4.88717142857143	3.38421123068602e-05	0.000156341546114404
PRF1	0.216228024786302	33.4976357142857	38.9139464285714	0.0156447214780066	0.0322919380317033
FBXL14	-0.357981535665933	11.3386535714286	8.84704642857143	1.78066971741004e-06	1.21876821570339e-05
PPIL6	-0.175746676545136	15.1611678571429	13.4223214285714	0.0039054777992785	0.00984651258829293
SP1	-0.0980835705186212	5.88795714285714	5.50096071428571	0.0204071189902295	0.0406196764287503
C18orf25	-1.31238736181093	28.8543535714286	11.6183214285714	8.17314691664804e-09	1.28505429566881e-07
METTL6	0.086203906608612	13.2240892857143	14.0383392857143	0.0163631730223055	0.0335556037471949
SGOL1	-0.182818011072636	19.708925	17.3631785714286	0.014290614698791	0.0299082554262771
B3GALNT2	0.143288661419093	3.41078571428571	3.76693928571429	0.0118889766396604	0.0256218342795451
CBR4	-0.219543252983834	26.35935	22.6383928571429	0.0214210736006004	0.0421863186869073
NLRX1	-0.44074176791037	42.1473928571429	31.0523321428571	0.000332230477592001	0.00115965587947873
ZNF569	-0.203726711516737	15.7691107142857	13.6923928571429	0.00173753919550187	0.00487750921798728
CCSAP	0.247725899080758	2.75756428571429	3.27415	0.000266150899285348	0.000955711060931026
DUSP18	-0.082668227055513	28.911025	27.3009571428571	0.0447011013835914	0.0788274157431945
ZNF697	0.0540810799162239	16.0626142857143	16.6761678571429	0.0676704704421032	0.111438646862608
CHRM3	-0.459528044624687	47.2711464285714	34.3767178571429	0.00136134293503319	0.00393204593068205
HTRA4	0.56752400924744	11.0965428571429	16.4448321428571	0.00184518041301956	0.00513877524420752
LINC00525	0.153747412090389	5.52216071428571	6.14315714285714	0.00833164388397556	0.0188600470121483
PRPF38A	0.0856242847577775	73.6942857142857	78.2004571428571	0.134580461474354	0.197061254146665
FAM218A	-0.122832225491629	4.02948928571429	3.70061428571429	0.00285755810761992	0.00754736795471753
RHEBL1	0.42603456921181	35.9813178571429	48.3421821428571	2.90547125143936e-08	3.63622046683685e-07
FAM195A	0.488396123816357	62.8441714285714	88.1631071428571	5.69172070404728e-05	0.000245024176687861
ZNF548	-0.425263451498473	90.0707964285714	67.0759678571429	2.40207849408543e-08	3.09781762159232e-07
AMER2	-0.126861557455966	30.8807035714286	28.2812142857143	0.0267144479794465	0.0508644050912304
RNF152	0.0564570788958512	3.66272142857143	3.80889642857143	0.574634438977333	0.628832340455934
GPR97	-0.00532313224438186	5.14828928571429	5.12932857142857	0.788511973651229	0.815764513999851
ZNF644	0.104602021102602	5.29489642857143	5.69306071428571	0.300614635597008	0.376243866174196
B4GALNT3	-0.16134454414766	35.4241142857143	31.6759357142857	0.00669007800419259	0.0155910275082841
CEP89	0.366139525681625	23.5481107142857	30.3511428571429	4.26960464275457e-07	3.55319083974105e-06
AK7	-0.0400305797563254	7.99411428571429	7.77535	0.00207867860838472	0.00569980246038427
ZFC3H1	0.270319536869166	3.37805357142857	4.07418571428571	0.000258570845708071	0.000929212906727782
IRAK2	-0.0479631755302528	2.62153214285714	2.53581071428571	0.173773825501736	0.24287702152248
LINC00337	0.021369345352773	4.452575	4.51901785714286	0.670060430263339	0.713771021576637
METTL21A	-0.31525003749201	27.4478714285714	22.060175	0.00136134293503319	0.00393204593068205
OTOGL	-0.165429711043404	4.71926428571429	4.20799285714286	0.000483531432786195	0.00160391468840976
MGC16025	-0.0278846684364198	2.91216785714286	2.85642142857143	0.417272444368857	0.487939923758323
FAM76B	0.121831748551236	27.1237642857143	29.5137892857143	0.152683954875419	0.218431050971979
SPATA25	0.00334509532902194	5.81100714285714	5.82449642857143	0.947737313696539	0.955002607835437
NXNL1	-0.024777871477764	54.3220785714286	53.3970785714286	0.263927981321902	0.339544551289691
GLIS3-AS1	0.165063614155487	13.23095	14.8347464285714	0.0121681822192854	0.0261845057823533
IQCG	-0.0976332132324256	15.08065	14.0938464285714	0.0110995518835613	0.024102176945599
MCM9	0.0695236034654267	2.98720357142857	3.13468214285714	0.0222540840128398	0.0437616781233719
PRR14L	0.0358494754625465	12.070475	12.3741714285714	0.385111226253876	0.457331736783053
AJUBA	0.646700180718661	32.3892285714286	50.7080321428571	0.000393894343367539	0.00134386361255638
KLHL32	0.0133716523489709	2.24566071428571	2.26657142857143	0.340493222176202	0.41503617445657
DCBLD1	1.22607698226999	22.4960428571429	52.6249964285714	3.82332107891678e-11	1.89491672115025e-09
GK5	0.127257958649928	5.39688928571429	5.89456785714286	0.143416830688969	0.207516093796708
FLJ31715	-0.0863134599886557	9.59167857142857	9.03465714285714	0.062894310815429	0.104871753843911
WBSCR27	0.077063748016986	19.3382285714286	20.3992964285714	0.522759435715603	0.583007901457067
LINC00638	-0.159886987600357	31.1752678571429	27.9048321428571	0.000240708133762785	0.00087227846486675
ZC3HAV1L	0.130999516481965	2.50084642857143	2.73855714285714	0.000714536419659429	0.00226001109688425
RASGEF1B	-0.491319011334682	13.2285321428571	9.41043928571429	2.73588357697715e-08	3.43413429060305e-07
C11orf45	0.241871815526351	11.8507821428571	14.0138571428571	0.420252829793535	0.489936133802709
C21orf58	0.171517730722572	13.4315	15.1271285714286	0.00435328488681066	0.0108089946158491
KIAA1109	-0.0393266449897494	2.52076071428571	2.452975	0.436340244527348	0.505239842147632
STOML3	-0.15379153320239	7.18580714285714	6.45921428571429	9.94456102224656e-05	0.000400641052567683
LINC01105	-0.160420293515952	9.05586785714286	8.10286785714286	0.00436078042007842	0.0108089946158491
FBXL13	-0.847483413950179	9.67725714285714	5.37816785714286	2.28059896216298e-06	1.49842644632894e-05
FAM227B	0.579272686768743	2.88143928571429	4.30514642857143	7.15519590607094e-07	5.60834855408072e-06
DTD2	0.96271588673363	18.3257571428571	35.71645	3.82251735965019e-07	3.24492318019563e-06
SPATA32	-0.164683941761407	84.4540285714286	75.3434607142857	0.00349305130463294	0.00895933156707634
C3orf49	0.0111735266185828	12.787375	12.8867964285714	0.60571876534348	0.657240885508822
NKX2-3	-1.01646955966403	14.0281321428571	6.93445	0.000167231680593386	0.00063379728803686
TMEM252	-0.0431762167340519	4.83553928571429	4.69296785714286	0.181696359584331	0.252080769495424
KIAA1524	0.950269815864306	3.90039642857143	7.53647857142857	5.35718780361258e-09	9.08446838844976e-08
FAM222A-AS1	-0.0187508087198953	5.10367142857143	5.03776785714286	0.726656563877435	0.762430979739125
TLE6	-0.0107496361896398	10.7560607142857	10.6762142857143	0.552622439769264	0.609376234516305
TCEANC	-0.147392429351541	10.0028857142857	9.03141428571429	0.00571199762513604	0.0136436801061799
LOC102725315	-0.0579824836016334	7.05374285714286	6.77587142857143	0.429735302624535	0.498628664369924
HECTD4	-0.0712551329177731	5.86030714285714	5.57789642857143	0.161184589358532	0.228798005539916
RTP1	0.0554957623992569	2.69295	2.79855714285714	0.702372592230599	0.741288209125083
PRR35	0.0667312171491234	36.3408321428571	38.0612428571429	0.0740675480067425	0.120335599452379
NXPE1	0.00517490570730006	6.91145714285714	6.93629285714286	0.499440391506074	0.562006540407457
CYP1B1-AS1	-0.151021977633984	4.27981071428571	3.85445	0.0010173892180983	0.00305986074619415
MAGEA2	1.38185218204499	4.1266	10.7540321428571	7.83815493331909e-05	0.000324298871659495
APOBEC3D	-0.264081964016326	11.3030285714286	9.41235357142857	1.07702411170626e-08	1.61309704713656e-07
LINC00315	-0.130957390457292	48.5233571428571	44.3127535714286	0.00412753986584361	0.0103264128361329
COL6A5	-0.567023715825037	7.96031428571429	5.373275	0.0345205423527852	0.0632408446859412
PGAM5	-0.0545964384742668	20.0029785714286	19.2601428571429	0.254742899975198	0.330743803200927
C4orf45	-0.0538057726275891	4.85251428571429	4.67487142857143	0.211782622738552	0.285329491024699
CCDC149	-0.129666226441137	26.5590107142857	24.276075	0.0167331502152563	0.0342943693594295
BEND2	0.00664157535504706	3.38241428571429	3.39802142857143	0.441168881137521	0.508983179791082
C10orf67	-0.309782087531757	39.2147	31.6369928571429	7.48800054669564e-08	7.94726958724773e-07
SPERT	-0.177990216878003	17.3739107142857	15.3573821428571	0.0162771801031149	0.0334181182113136
CCDC26	-0.10043231555975	3.28551071428571	3.06457142857143	0.0128423284515789	0.0272846297581331
C21orf88	-0.0753691412108246	5.68213571428571	5.39291071428571	0.123465534977691	0.183761243176938
SPIC	0.0297184246802065	2.90531071428571	2.96577857142857	1	1
VPS13B	-0.00261447786507318	5.73021785714286	5.71984285714286	0.980389431969563	0.983476337471596
P2RY10	0.225502937063698	12.1647857142857	14.2228821428571	0.000875871231458095	0.00268133413443478
IGSF22	-0.110807084706387	38.9772821428571	36.0956857142857	0.0116154666336266	0.0251351808988742
ZBTB3	-0.0498494104660168	39.0375178571429	37.7116928571429	0.509858600044535	0.571208975793674
DCST1	-0.149808858480309	11.6267	10.4799571428571	0.00330180625101546	0.0085350098558984
TCP11L2	-2.10803840617422	71.4957178571429	16.5843035714286	7.10789373472564e-09	1.14740164079328e-07
WDFY4	0.00606582760819396	8.61798928571429	8.6543	0.499440391506074	0.562006540407457
GPR26	0.125506430936597	3.75797142857143	4.09953571428571	0.429735302624535	0.498628664369924
KIAA0825	-0.00193083956581508	2.13090357142857	2.12805357142857	0.726656563877435	0.762430979739125
SESN3	-0.12706702926014	6.35982142857143	5.82363214285714	0.0278967184391927	0.0527547361566111
CSNK1G2-AS1	-0.0438606983236696	22.7893571428571	22.1069428571429	0.278220585564391	0.354036573405039
NATD1	-0.139966537744233	24.8324535714286	22.53645	0.0039054777992785	0.00984651258829293
KLHL34	-0.099889257449056	4.08591071428571	3.81258214285714	0.0868130628762172	0.137177588243951
SAMD3	0.0260200944809859	3.95598214285714	4.02797857142857	0.600008853344491	0.651412679594186
GOT1L1	0.208930813121781	3.41012142857143	3.941525	0.064953837068366	0.107678055293579
MGC16142	0.0111334929887374	4.101125	4.13289642857143	0.643000625732351	0.688654971780048
LINC00504	0.426609737587519	3.17219285714286	4.26365357142857	9.38748862359021e-09	1.44590554396681e-07
ZNF99	-0.0264963840376533	2.29338928571429	2.25165357142857	0.241325977958848	0.316861997241786
CCDC108	-0.0769753469368335	2.46626428571429	2.338125	0.0781292439367638	0.12550716526841
SIGLECL1	-0.0627995478941696	3.35648928571429	3.21351785714286	0.133764368211366	0.19661448287659
LDHAL6A	-0.165274545803717	6.59331071428571	5.87964285714286	0.00136134293503319	0.00393204593068205
MRGPRX2	-0.12161073312937	9.5269	8.75675357142857	0.0244770832040105	0.0472032542232982
NTN5	-0.102201542199936	23.4125607142857	21.8113821428571	0.130320502774485	0.192019271754956
KLF17	-0.033022675510193	6.26234285714286	6.12062857142857	0.308334770195861	0.383795361819492
CCDC105	-0.21067713131858	19.553	16.8963642857143	0.000875871231458095	0.00268133413443478
C11orf42	-0.0663814181146152	8.93000357142857	8.528425	0.243437706970906	0.318213229933619
DKFZp434L192	-0.0877292588976666	3.273575	3.08044285714286	0.0096209075157658	0.0213223652483141
POM121L1P	0.000153969887055183	18.4043392857143	18.4063035714286	0.826293419422692	0.848587743739624
ZNF486	-0.028365650667568	3.73532142857143	3.66259642857143	0.512155716946063	0.573448570854956
FGD2	0.18681275278009	430.0557	489.509303571429	0.300614635597008	0.376243866174196
EXD1	0.0825041998460152	3.27509285714286	3.46784642857143	0.065244037792054	0.108090553178619
FAM178A	0.15763909485322	17.9340642857143	20.0047357142857	0.00382400499574788	0.00970701903862449
NBPF4	-0.0486205229862193	5.16041785714286	4.98940357142857	0.298069587254518	0.374609339929174
LINC00955	-0.0242928729113345	3.12898571428571	3.07673928571429	0.799488595006896	0.826359906031367
MGC34800	-0.0135560595211635	9.41285	9.32481785714286	0.726656563877435	0.762430979739125
PIKFYVE	-0.080879854521692	14.6451821428571	13.8467392857143	0.108287625483455	0.164798721279042
LINC00479	-0.00617386022374333	16.4209178571429	16.3507964285714	0.552622439769264	0.609376234516305
C9orf62	-0.0928443048593586	13.2152857142857	12.3916071428571	0.27582621117287	0.352366902514273
C9orf84	0.0348796353022569	2.99548571428571	3.06878928571429	0.475944993282129	0.541732043932109
SLC22A24	-0.00200642641648718	7.00777857142857	6.99803928571429	0.80583181424561	0.831042282777635
FMO9P	-0.81444087242974	30.0686357142857	17.0978928571429	2.93160608851603e-05	0.000138031199034054
C7orf33	-0.119414765520376	8.66558928571428	7.97720357142857	0.0186975769173437	0.037560210754793
ELMOD2	0.286487914569774	54.2945071428571	66.2212464285714	0.000193703453580238	0.000721207985242536
ACER1	-0.76428991909845	19.7226464285714	11.6115714285714	2.7973023249068e-10	8.50564785948313e-09
TAAR1	0.0243205482659756	2.7749	2.822075	0.718460845391902	0.755968123652803
LINC00305	-0.0955076698877906	3.12109642857143	2.92116785714286	0.0170520460113386	0.0347326708121231
BFSP2-AS1	-0.0721009876465644	3.16487142857143	3.01058928571429	0.0536964789418428	0.091917704751777
STK32A	0.0126608647168429	4.36336428571429	4.401825	0.80583181424561	0.831042282777635
GPHB5	0.247140367490238	10.2031714285714	12.1096571428571	1.92742420674387e-05	9.53707703701672e-05
DCD	-0.110125867571311	9.3983	8.70759285714286	0.0303946036702291	0.0568334509165098
EXOSC6	0.224948684073087	12.7490821428571	14.9003071428571	0.000180019828039469	0.000676568925732425
IQSEC3	-0.102304399822505	10.6164428571429	9.88968214285714	0.0496669167368866	0.0860570622975873
ZDHHC19	-0.206653890271604	21.5765428571429	18.6970392857143	0.000302255106010909	0.00106557134907694
ALG14	-0.173787143983414	113.142528571429	100.302264285714	0.00669007800419259	0.0155910275082841
PPP1R21	-0.102678269773707	187.788810714286	174.888185714286	0.271010783922649	0.346780411158777
TMEM237	0.532669577056256	93.8867571428571	135.816914285714	0.0244770832040105	0.0472032542232982
ZNF564	-0.360582061562652	50.4650857142857	39.3047464285714	0.000321942583611268	0.00112430212821209
B3GALT6	1.02662071688404	80.1129714285714	163.209889285714	9.27139084341438e-12	6.83660085084246e-10
SNX21	-0.557305923576013	70.9313607142857	48.202825	5.85378616250323e-08	6.44556069495608e-07
RHOB	0.303861985763662	4.23328928571429	5.22576071428571	3.05708175954657e-07	2.68229773123068e-06
ADAT3	0.0253245320596545	15.1040428571429	15.3715142857143	0.664100640975672	0.709028446421559
GATS	0.21767905266405	39.7025785714286	46.1685928571429	0.143416830688969	0.207516093796708
CBS	0.936024793158702	26.9470535714286	51.5564285714286	1.36495713906404e-07	1.33302205509978e-06
C22orf39	-0.291428780334049	55.6441714285714	45.4664321428571	0.00153908493486501	0.00438852795426411
DPCD	-0.247789638346091	168.605989285714	141.997560714286	0.0029471622790404	0.00773159728664088
CYP39A1	-0.286995738753992	34.590475	28.3505964285714	0.000483531432786195	0.00160391468840976
MEF2BNB	0.274600323394498	88.4827071428571	107.033896428571	0.000258570845708071	0.000929212906727782
RAB7B	0.448628661757238	44.4256785714286	60.6296071428571	0.000591471286115851	0.00190725382112902
DTYMK	0.498064766429533	16.4671607142857	23.2568642857143	3.50240019201659e-08	4.23108429335878e-07
MAPKAPK5-AS1	0.187465316886835	117.861453571429	134.216057142857	0.0134738698417713	0.0284209615729499
BRICD5	0.130147833536759	13.9987178571429	15.3202785714286	0.0496669167368866	0.0860570622975873
LOC101928274	-1.55758382833244	55.2454214285714	18.76795	7.1123284807195e-14	3.96100546414386e-11
NBR2	0.111603722136848	40.186225	43.4183464285714	0.788511973651229	0.815764513999851
NT5E	0.162165887294123	17.5050071428571	19.5875035714286	0.864474836634896	0.882659379924943
ASPHD1	0.194633188244672	26.2579714285714	30.0504928571429	0.00036758045305068	0.00126427842156859
DMRTC1	-0.0642261849072034	8.999725	8.60786071428571	0.420252829793535	0.489936133802709
TRIM37	0.499450070798821	15.3620142857143	21.7168892857143	3.20990061785988e-05	0.00014841845483017
ARHGEF28	-0.229196349902598	77.655525	66.2487035714286	0.0029471622790404	0.00773159728664088
LLGL2	-0.206557880324065	27.7740571428571	24.0690642857143	0.000769599835295046	0.00240009450550384
OSMR	1.21459228552713	36.7347142857143	85.2521571428571	7.10789373472564e-09	1.14740164079328e-07
RSPO2	-1.15395987067967	7.60236785714286	3.41642857142857	5.59761170045803e-11	2.5808770461175e-09
CHD2	0.260563509488252	113.720828571429	136.231471428571	0.0330787325559912	0.0610380344478544
USB1	1.10776273827386	43.3883714285714	93.5067928571429	4.8269699909589e-12	4.56040919279746e-10
GPNMB	2.21172750488792	41.7642928571429	193.464575	1.40967919383849e-11	9.17939716283199e-10
CEP57L1	0.212536719827316	9.02389642857143	10.4562035714286	0.00634877124413062	0.0149437265976572
BICD1	1.68073485987224	10.9055214285714	34.9621428571429	4.17587815577538e-13	1.03969540483146e-10
MYO10	1.36913871862024	16.8992	43.6533892857143	9.0774386106162e-07	6.83407446874673e-06
SLC4A4	-0.519852862616188	5.79311071428571	4.04036428571429	1.41307140844806e-08	2.01379328060514e-07
TTC37	-0.0438317598733695	3.99511071428571	3.87555714285714	0.122110209627572	0.181923151450074
ARSB	0.194548429474434	8.61291071428571	9.85632142857143	0.00247896791815934	0.00665850971595458
FRMD4A	-0.191563737345299	5.860675	5.13193571428571	0.000421923400113368	0.00142661206528187
ZBTB24	0.927908765520137	11.7894357142857	22.4295928571429	3.48863371664519e-05	0.000159874307807194
C14orf159	0.185928817224171	33.3878178571429	37.9802821428571	0.000167231680593386	0.00063379728803686
TMEM239	0.0595058524515237	6.06388928571429	6.31923214285714	0.10472791015251	0.160162029185247
MRAP	-0.0010224652715598	9.10415357142857	9.09770357142857	0.730744489947224	0.766155027695906
ZNF24	-0.128034999910745	10.7120107142857	9.80231428571429	0.0082227109763134	0.0186313953310193
TXNDC9	0.351104347148759	7.13393571428571	9.09959642857143	0.00051732540425424	0.00169949666722019
DCAF8	0.301337163074423	14.7023785714286	18.1175357142857	0.0278967184391927	0.0527547361566111
SMPDL3B	0.161396919507801	24.139725	26.9971321428571	0.00909882895114321	0.020333528732106
CNOT1	-0.322855026364915	21.5063535714286	17.1940321428571	0.0082227109763134	0.0186313953310193
SPTLC1	-1.67816359495552	59.6918964285714	18.6525321428571	1.3960428728727e-10	5.07636689323109e-09
ASH1L-AS1	0.643504222879089	58.2403142857143	90.9782928571429	4.95745500154368e-06	2.94373232877859e-05
SETMAR	-0.165065540777912	22.5230714285714	20.0880571428571	0.00311997776734981	0.00811255553390147
XG	-0.686253302332387	52.4324928571429	32.5849964285714	0.000591471286115851	0.00190725382112902
ZHX1-C8orf76	0.248081268336415	24.2377535714286	28.7854	0.000769599835295046	0.00240009450550384
MVB12B	-0.0643149146011592	14.6119285714286	13.9748392857143	0.184390758558079	0.254766705188002
EPHA8	0.141113093473665	10.3552571428571	11.4193178571429	0.0039054777992785	0.00984651258829293
CCDC67	-0.0466565060904252	2.85175714285714	2.76100714285714	0.0946144366631742	0.147344855374389
TMEM136	0.353577386113003	24.2421571428571	30.9748107142857	0.000298002484233234	0.00105145491394264
TMEM53	0.0691464770991637	21.4018	22.4525392857143	0.0674202756474771	0.111131341500705
DNAJA3	0.499657056835786	239.451457142857	338.555010714286	3.5387323154775e-08	4.23108429335878e-07
GALNT18	1.10407052398253	32.3365642857143	69.5107892857143	1.16775804725478e-10	4.4289002785041e-09
NOL9	0.564692298255715	22.9012392857143	33.8725821428571	8.17314691664804e-09	1.28505429566881e-07
DDX51	0.488348962615872	17.9368392857143	25.1624892857143	1.13272214528995e-06	8.25191007255463e-06
TUBGCP3	0.350378443368252	8.01437142857143	10.2174821428571	0.0171104516770196	0.034808083133785
SBDS	-0.111097552058274	249.444985714286	230.956975	0.410892410318653	0.481437054566142
SNAPC5	0.376355989469554	150.625892857143	195.5213	2.0639970326987e-06	1.37836444313672e-05
RBM33	0.0957686243377767	32.4318964285714	34.6578464285714	0.552622439769264	0.609376234516305
MIR31HG	0.0549012576871499	39.85925	41.4053107142857	0.714479022269836	0.751965364446814
TMTC4	0.325629303246844	9.14332142857143	11.4585107142857	0.0267144479794465	0.0508644050912304
TMEM185A	0.198676015763204	65.5792428571429	75.2616678571429	0.110547711354912	0.167395622166858
NBEAL1	0.527268371360173	56.2555642857143	81.0753964285714	0.00781313375412631	0.017854373138816
CDCP1	0.248451981621807	19.8407678571429	23.5694785714286	0.0516493812206826	0.0889386374917255
ULK2	0.0796330527240054	9.49371071428572	10.0324714285714	0.177802061220675	0.247164018760716
SSH2	0.403022488495563	4.953375	6.549725	3.37858873143997e-06	2.10979856369029e-05
C5orf58	-0.229806387851243	13.605225	11.6018464285714	0.00121023951667905	0.00355874654598843
HSD17B12	0.0236946436786389	3.78376071428571	3.84641785714286	0.712339078899415	0.751100160956114
MSRB3	-0.0355341476054534	74.4044035714286	72.5941785714286	0.31618275443615	0.391743787373821
ADIG	-0.114757608437919	25.8135285714286	23.8397607142857	0.0899889089469014	0.141194786480077
CCSER2	0.166334936640592	2.28210357142857	2.56098571428571	0.000114947328822346	0.000455890239855193
RUFY2	-0.0392912061260464	2.46026071428571	2.39416071428571	0.574634438977333	0.628832340455934
WDR78	0.693932091294065	3.61485357142857	5.8477	0.000388446733057463	0.00133366291558973
SUGT1P3	-0.0132085978590355	2.24191071428571	2.22147857142857	0.278220585564391	0.354036573405039
MAATS1	-0.131996606607826	4.97351785714286	4.53867142857143	0.00865103871195174	0.0194747295246287
SLC33A1	0.701437699227357	21.8783857142857	35.5769785714286	7.81424680405529e-05	0.000323499423149887
CLDND1	-0.231143171919246	469.815153571429	400.263503571429	0.0155329013571092	0.0320861680254272
OGDH	0.0769134682660129	25.2280535714286	26.6095178571429	0.072580343196597	0.118264382743269
PHF21A	0.23305662010547	57.522825	67.6078678571428	0.00956681342523425	0.0212158097577525
GDAP2	0.22303456264131	30.5585535714286	35.6675178571429	0.0278967184391927	0.0527547361566111
MCPH1	0.448913399621879	9.24231428571429	12.6158678571429	0.00120238470487637	0.00354007616990799
WFDC8	0.111507765547454	3.09877142857143	3.34777857142857	0.0244770832040105	0.0472032542232982
ZMYND11	0.110330100180815	5.67400714285714	6.12495	0.122110209627572	0.181923151450074
ZNF446	-0.0409749452441268	35.382	34.3912285714286	0.308334770195861	0.383795361819492
TWIST2	0.130959204909864	7.42967142857143	8.13565	0.0278967184391927	0.0527547361566111
FAM53B	0.0149840690289931	3.96403928571429	4.005425	0.87628713671804	0.894219882900437
GOLGA7	0.80424732830387	85.3655178571429	149.068214285714	4.50827303023236e-06	2.71664527730089e-05
SH3KBP1	0.418506316073637	192.270610714286	256.97795	0.00207867860838472	0.00569980246038427
MBLAC1	-0.104622276708321	56.1599642857143	52.2314857142857	0.0883270318229141	0.139401944087255
ZMYM3	0.288111629785768	28.2775285714286	34.5280214285714	0.000769599835295046	0.00240009450550384
CD300LB	-0.0438973941748362	38.2729892857143	37.1259821428571	0.449062510297533	0.516326736141839
C3orf33	0.19110487986299	2.95885714285714	3.37794285714286	0.0124531828432675	0.0266235688970674
ATP5S	-0.258765795963853	49.9481857142857	41.746825	4.46562756006945e-05	0.000198458790537064
FAM126B	-0.516733591784584	92.3488	64.5474285714286	2.77921326244868e-06	1.77854521539768e-05
LYNX1	-1.74723761903137	1047.72019285714	312.086067857143	9.0774386106162e-07	6.83407446874673e-06
SNX32	-0.048178569943599	10.6469571428571	10.297275	0.412583383348072	0.48296377796312
TRIM73	0.107943994572193	16.2700678571429	17.5341107142857	0.00036758045305068	0.00126427842156859
LOC554206	-0.146328519353079	5.76883214285714	5.21241071428571	0.0105663926197968	0.0231491512083444
C11orf53	-0.0726275658016364	22.8887214285714	21.7649892857143	0.147995900098742	0.213020283873337
MANEA	0.27065379337168	6.3496	7.65986785714286	7.68836056906991e-06	4.31016621783381e-05
C5orf46	0.37086730613788	25.1101178571429	32.4706464285714	0.064953837068366	0.107678055293579
SH3YL1	-0.0806122576454449	20.4810607142857	19.3680428571429	0.0625610840991628	0.104390146084569
PTPRO	0.172686467360447	4.2277	4.765275	0.0477476093332648	0.0832152397529344
GRIK1-AS1	-0.035572886932115	6.37954642857143	6.22416785714286	0.305734968889545	0.38189482766044
TMLHE	-0.244057156393392	20.9827321428571	17.7171357142857	0.000769599835295046	0.00240009450550384
MEI1	0.159355287506109	43.0023857142857	48.0245464285714	0.00301583699443384	0.00790718177207241
ZCCHC13	-0.0637940868473215	4.73575357142857	4.53090714285714	0.187107086096232	0.258344645329488
KCNS2	-0.151424003050959	14.3706035714286	12.9387357142857	0.00956681342523425	0.0212158097577525
ARHGEF10	-0.104619569149079	13.9903821428571	13.0117571428571	0.0247658736887474	0.0477210402326287
CCDC132	0.270490056124127	3.77874285714286	4.55798571428571	0.00704748076621936	0.0162983100705388
MGC45922	-0.041289284818947	24.9855392857143	24.2806	0.52038757077133	0.580668678700499
CREBRF	0.0170101507046825	17.164075	17.3676464285714	0.617210908030552	0.667042919346878
C1QTNF9	-0.120834637785969	3.20543571428571	2.94789642857143	0.00412753986584361	0.0103264128361329
KATNAL2	0.174136130458696	14.2418571428571	16.068925	0.0247634110294251	0.0477210402326287
CTNNA3	-0.0746427439895212	2.82157142857143	2.6793	0.0521524159341593	0.0897391315078147
ZADH2	-0.310130229438785	76.4959357142857	61.6992464285714	0.00195879736117845	0.00541034045348728
ITGAL	0.693533939529635	34.0345178571429	55.0419892857143	0.00153908493486501	0.00438852795426411
COCH	0.50094975853169	186.059375	263.300971428571	0.00369413089215569	0.00940102117252175
ARL17A	0.241645691159769	40.1893107142857	47.5174535714286	0.0477476093332648	0.0832152397529344
C1orf210	-0.605525165649614	9.53105357142857	6.26411428571429	4.631485550805e-11	2.20260963397048e-09
ZNF638	-0.113853081734891	54.4640178571429	50.3311071428571	0.167414490920988	0.235305364372775
ZNF638	0.330366259328486	21.7909678571429	27.3984928571429	0.152683954875419	0.218431050971979
STAG3L2	0.0168600872102269	70.343775	71.1706714285714	0.941691369336166	0.949452808445035
HP1BP3	0.10226629261819	120.834657142857	129.710978571429	0.619840744462063	0.668519502346888
CERS3	-0.678102659075415	86.3169142857143	53.9469214285714	6.16532295254715e-05	0.000262054086452612
PCNXL2	0.295894383644097	10.8542678571429	13.3251964285714	0.0195703142437525	0.0390612619391242
DNAJC5B	0.19320741008779	19.4348857142857	22.2199571428571	0.15748225616062	0.223842903292847
GPSM1	-0.0710189667461769	24.1314857142857	22.9723392857143	0.236858748312585	0.311537706062103
FRYL	0.418385438980426	22.6843107142857	30.3160178571429	0.000193703453580238	0.000721207985242536
KLHL29	-0.254979967251217	11.7317892857143	9.831225	0.00135682439483802	0.00393204593068205
CKAP2	0.189743535980081	4.1746	4.76138571428571	0.0073767534899606	0.0170435088969995
MORN1	-0.0897063417031814	11.63715	10.9355928571429	0.0390476266885083	0.0701498237358999
CENPL	0.738236035493975	8.97690714285714	14.9746928571429	2.71345651143695e-05	0.000128467293403893
ERAP2	-0.00413709232617077	2.525625	2.51839285714286	0.646349564558237	0.691996551563007
SSH1	0.343338907807349	12.2302928571429	15.5164428571429	4.46562756006945e-05	0.000198458790537064
SART3	-0.0771311008777755	6.47223571428571	6.13529642857143	0.0699619321827051	0.11463335171745
FANCM	0.332809752959419	4.01366071428571	5.05506071428571	0.000124005631407512	0.000486077269397514
TRMT2B	-0.156681663809433	20.5153428571429	18.4040285714286	0.0155329013571092	0.0320861680254272
C9orf43	0.115494065008376	5.74014285714286	6.21856071428571	0.110099957495506	0.167395622166858
CCRN4L	1.22642768522382	9.75471785714286	22.8247607142857	1.03369143984121e-09	2.37782738493038e-08
HAVCR2	0.216434468949768	8.077775	9.38523214285714	0.00541535202592637	0.0130292286180855
FLJ25758	-0.0622374048953178	21.782275	20.862575	0.162392035135763	0.229603329741993
TRIM4	0.378979737928682	63.9819285714286	83.2035	0.0170520460113386	0.0347326708121231
FAM160B1	0.0755690457510632	4.49790714285714	4.73978928571429	0.300614635597008	0.376243866174196
HERC3	-0.0380584195078648	5.12328928571429	4.98990357142857	0.348851682195935	0.423177126579879
UHRF1BP1L	-0.201553012643674	6.51940357142857	5.66936428571429	0.0148182272591936	0.0308083449736039
TTBK2	0.0832522313888644	3.56123571428571	3.77278571428571	0.308334770195861	0.383795361819492
CYP19A1	-0.0527906187588745	2.51677857142857	2.42635	0.0809399851544454	0.12923747472903
WDR49	0.243257468457146	2.73341428571429	3.23543928571429	0.31618275443615	0.391743787373821
NPAS4	-0.169957347621894	7.26777142857143	6.46009642857143	0.001395945676985	0.00402979107380078
LHFPL3-AS1	-0.0170624572643567	3.59508214285714	3.55281428571429	0.736875885481443	0.772241681890326
HNMT	-0.201392478432195	23.44415	20.3896285714286	1.08280201080755e-05	5.76631579132365e-05
MGC20647	-0.0730801008712549	7.16264285714286	6.80885357142857	0.0868130628762172	0.137177588243951
LOC644852	-0.105479047499387	3.87608571428571	3.60280714285714	0.0305335200736926	0.0570377690281187
GABRA2	-0.12059032157388	3.21589285714286	2.95801428571429	0.00256784669321588	0.00688762225203139
EIF4G3	0.502496444535554	6.37916428571429	9.037125	0.000933863225311252	0.00283630129696642
RNF170	-0.124799403252847	26.904175	24.6746678571429	0.0234195814702408	0.0454955574311278
TRMT61A	0.0841323112948791	26.5570964285714	28.15185	0.0359595094417378	0.0654464308836857
RPS6KA5	0.0831283625994843	2.55209642857143	2.70346785714286	0.0946144366631742	0.147344855374389
NFS1	0.15561369290204	6.98319642857143	7.77855	0.0167256935859378	0.0342923709900409
HDAC4	0.194596768278259	17.4732928571429	19.9965107142857	0.00737776236854004	0.0170435088969995
DYNC2LI1	-0.0368416739631476	4.10156071428571	3.99814642857143	0.449062510297533	0.516326736141839
DOCK2	0.0325432193959823	4.10798571428571	4.20170357142857	0.608396633829791	0.658391182334827
CANT1	-0.103736702343358	21.0933035714286	19.6298392857143	0.0423540488565084	0.0752088216101936
STXBP4	0.134117758402742	2.87308214285714	3.15298214285714	0.00293694241169901	0.00773159728664088
LRRC18	-0.148040123543528	9.53812857142857	8.60792857142857	0.001395945676985	0.00402979107380078
SLCO4A1-AS1	-0.508443273397006	36.8803678571429	25.9261821428571	2.17406836646612e-07	1.98918326154442e-06
CYTH4	0.1735391017385	13.0196071428571	14.6837964285714	0.00120238470487637	0.00354007616990799
FARP2	0.036978015869563	5.53462857142857	5.67832142857143	0.325470880766203	0.400795088142192
COG3	0.0575968252394621	3.331375	3.46706428571429	0.126164214861332	0.186949536417194
DRAXIN	-0.031294546103523	2.88118928571429	2.81936428571429	0.363094141511427	0.437445139292174
HELQ	-0.551177523114833	18.1702714285714	12.4005357142857	3.38716131339891e-06	2.11160397137759e-05
STAP1	0.372528170309413	8.25299285714286	10.6844857142857	0.00195380870626057	0.00541034045348728
AQP12A	-0.221271494538503	144.571325	124.014596428571	7.90271422143687e-06	4.38388312105553e-05
GIN1	-0.0980399073864699	19.73485	18.4383	0.15748225616062	0.223842903292847
GNB5	0.252977967138003	26.4582107142857	31.5293071428571	1.03843640421412e-05	5.54540237758855e-05
CDKN2AIPNL	0.270164137208278	7.73708571428571	9.3305	0.0214210736006004	0.0421863186869073
XRCC6BP1	0.00852860033549874	10.2780285714286	10.3389678571429	0.726656563877435	0.762430979739125
DENND4A	0.406101439318983	51.7303392857143	68.5478821428571	0.000298002484233234	0.00105145491394264
SIAE	-0.0812599155791505	2.19261785714286	2.07253214285714	0.00874196086789623	0.0196652611672643
GINS4	0.294261360914456	4.07371785714286	4.995425	0.000208339073753038	0.000769472917597826
FCHSD2	0.42858824134722	15.8236035714286	21.2972392857143	0.000102858936056346	0.000414155948204043
BTG4	-0.0496443968803759	2.70495	2.61345357142857	0.0823810770039802	0.131430888249923
PPP2R5C	0.14104756833432	14.5232142857143	16.0148285714286	0.278220585564391	0.354036573405039
CALHM1	-0.0256289233902827	12.6547321428571	12.4319107142857	0.324158563692514	0.399567108359524
NT5C1B	0.0645990103233749	3.31241071428571	3.4641	0.21903548669603	0.293303046388683
PKD1L2	-0.0364863164290878	8.26884285714286	8.06234285714286	0.348851682195935	0.423177126579879
NR1H4	-0.0650691362344444	4.52489285714286	4.32534285714286	0.172550789422498	0.241338467817614
PTPLA	-0.00156642371399229	12.5194	12.5058142857143	0.954633130705365	0.960624836913016
PDE1C	-0.0143734449165187	4.368525	4.32521785714286	0.628797560333308	0.67742021835338
TRAM2	0.0357391830892193	9.79063928571429	10.0362071428571	0.643000625732351	0.688654971780048
VPS29	0.0874020956016022	15.7919321428571	16.7782214285714	0.064953837068366	0.107678055293579
ACTR2	-0.119927493757737	116.965457142857	107.635578571429	0.410892410318653	0.481437054566142
LOC653581	0.0443227076624115	14.8767571428571	15.3408964285714	0.256971821281798	0.332332843668216
NELL1	-0.131222963756437	5.31215	4.85029642857143	0.0234195814702408	0.0454955574311278
UEVLD	-0.0280945264087036	36.2780857142857	35.5784535714286	0.383551914777674	0.455914916447984
TCTE3	-0.103257951874481	6.85235714285714	6.37905357142857	0.0139686829242152	0.0294060714936005
RP11-574H6.1	-0.0913165422332591	3.30961785714286	3.106625	0.0483081375431009	0.08411593835977
CLEC7A	0.95574216085771	41.5519821428571	80.593275	2.17406836646612e-07	1.98918326154442e-06
TK1	0.890749405159104	41.4518428571429	76.8574785714286	1.41307140844806e-08	2.01379328060514e-07
WBSCR16	0.274754324140503	4.73426785714286	5.72746071428571	3.48863371664519e-05	0.000159874307807194
CTNNB1	-0.23180649317089	6.20863571428571	5.287075	0.000828521096037778	0.00255926658155258
SNX29P1	0.0486595249474142	4.85259285714286	5.01905357142857	0.941691369336166	0.949452808445035
OSGIN2	0.749840130603961	14.1430214285714	23.7829964285714	3.06771462263975e-12	3.43502881264154e-10
TAF5L	0.497772562622065	26.4023321428571	37.2809321428571	0.000208339073753038	0.000769472917597826
APH1A	0.109522237399415	32.8745642857143	35.4674107142857	0.279452621499626	0.355326593895493
ATF3	-0.059300534624827	5.63437142857143	5.40747142857143	0.263927981321902	0.339544551289691
FBXO7	0.134017732355459	83.562075	91.6964607142857	0.285557682443612	0.36124438003193
FIP1L1	0.144625182035294	4.30874285714286	4.76307142857143	0.00742161470814237	0.0170628606266613
NLGN2	-0.031203989581492	40.5205464285714	39.6535392857143	0.585791328686825	0.638861215614495
DMWD	0.209871355029373	43.6143178571429	50.4436678571429	1.03843640421412e-05	5.54540237758855e-05
SMIM11	0.111213681478163	21.9606464285714	23.7204964285714	0.0255749741880533	0.0490034566538499
ZNF146	0.605560077468854	11.0244964285714	16.7745357142857	0.000995323568921603	0.00299502810878542
REG4	-0.67673168740014	6.98915	4.37227857142857	0.421992773947172	0.491396119458787
KIAA1217	-0.52720774616298	20.6833357142857	14.3520928571429	1.07702411170626e-08	1.61309704713656e-07
KIAA0513	0.209750765784389	5.19230714285714	6.00484285714286	0.0931877147545561	0.145340968925541
WAPAL	0.134215222807462	33.3632464285714	36.6160178571429	0.230404426179144	0.305096287775574
BEST1	0.0869672939692645	49.9082928571429	53.00935	0.134580461474354	0.197061254146665
SLC35F6	-0.0300503768155673	60.9356464285714	59.679525	0.678383919143819	0.720678624609239
ZNF85	-0.360617457314958	21.5767785714286	16.8046678571429	0.0110995518835613	0.024102176945599
JPX	0.166790719991735	110.139264285714	123.637775	0.332262106334436	0.407396463288277
DNAJC14	0.0949793286085501	7.228025	7.71989285714286	0.152683954875419	0.218431050971979
HILPDA	-1.08424354269791	450.347767857143	212.401796428571	0.000106503700800894	0.000425191062073065
HNRNPLL	0.145641167700776	5.78638928571429	6.40103214285714	0.0699619321827051	0.11463335171745
LINS	-0.000744326477571278	48.1919285714286	48.1670714285714	0.954633130705365	0.960624836913016
ST8SIA4	0.139629855942728	2.685325	2.95821428571429	0.00413343671626405	0.010328116063802
CRTAP	-0.315331811402934	10.7984607142857	8.67835714285714	0.000553264951502323	0.00180051455768778
KRBOX4	0.14061798129435	7.56435714285714	8.338775	0.15874879553288	0.225552249738996
C16orf13	0.69558725413206	51.3670285714286	83.1911392857143	3.06520747559969e-06	1.93523227345215e-05
FBF1	0.0623680586801663	8.32648928571429	8.69433928571429	0.0998539923790228	0.153688002961255
ZBTB44	-0.194165111854768	9.47779285714286	8.28433571428571	0.000483531432786195	0.00160391468840976
ANKRD13C	-0.0969671443335498	25.9227214285714	24.2376535714286	0.0780535875201098	0.12550716526841
PHF20L1	0.343859764219083	13.4730285714286	17.0992607142857	0.00051732540425424	0.00169949666722019
SRGAP1	-0.163570183441008	12.3458714285714	11.0225535714286	0.0128423284515789	0.0272846297581331
MOXD1	0.0336563524002997	51.3890892857143	52.6020285714286	0.980548633022288	0.983476337471596
C19orf47	-0.0938459514018395	16.78685	15.7296392857143	0.0674202756474771	0.111131341500705
HEATR3	0.456332674210353	4.61156785714286	6.3273	0.000321942583611268	0.00112430212821209
CARD8	-0.227381893771721	65.1316857142857	55.6344178571429	0.0625610840991628	0.104390146084569
ARMC10	0.32681012952671	149.889975	187.997571428571	1.52421098989688e-06	1.06003539859309e-05
EPB41	0.0451104464160785	18.6285214285714	19.2202035714286	0.813650987488173	0.837473656349993
SAR1B	-0.433968405222369	68.3005357142857	50.5576178571429	0.0234195814702408	0.0454955574311278
TMEM37	-0.104450827178971	71.6911035714286	66.6841214285714	0.0100557439773839	0.0221584454178858
GFOD1	0.0965409202579721	7.53306428571429	8.05440357142857	0.162392035135763	0.229603329741993
ATF6B	0.0118798787313334	8.1566	8.22404285714286	0.751213816531547	0.783844689836167
CEP70	-0.066597697797441	24.6937642857143	23.5797607142857	0.134580461474354	0.197061254146665
SERPINC1	-0.0684625566475954	5.36050357142857	5.11206428571429	0.0674202756474771	0.111131341500705
THADA	0.109270482809874	2.32371071428571	2.50654642857143	0.0186953036450909	0.037560210754793
MTHFSD	0.0507518706040226	2.66925	2.76482142857143	0.167414490920988	0.235305364372775
RAD51B	-0.174078467424612	9.88166428571429	8.75845	0.00311997776734981	0.00811255553390147
PPA2	0.144449643652612	8.3544	9.23419285714286	0.00413407698230243	0.010328116063802
RGS7	-0.128667531041276	3.760575	3.43970714285714	0.000591471286115851	0.00190725382112902
OSCAR	0.547712922477981	12.8145071428571	18.7318178571429	6.59786292505841e-07	5.17917555945887e-06
NAALAD2	0.00893350441835516	2.26195357142857	2.27600357142857	0.676035839961081	0.719707076886234
PIK3AP1	0.188331802232694	4.52698928571429	5.15825714285714	0.00135682439483802	0.00393204593068205
FAM188A	-0.230997131141629	25.3258857142857	21.5788142857143	0.00144774913731862	0.00415552895606591
GHITM	-0.30839215735916	122.861478571429	99.2157107142857	0.0204777832924603	0.0406196764287503
WWC1	-0.255388881668469	15.7344642857143	13.181725	0.00112938905679819	0.0033550337744273
ACSM5	-0.0747758893989396	4.67075	4.43482857142857	0.15874879553288	0.225552249738996
LINC00537	0.0811417566143149	25.5440142857143	27.0218607142857	0.0780535875201098	0.12550716526841
GSTCD	-0.0918267176118497	16.4260178571429	15.4130892857143	0.0121667071856227	0.0261845057823533
CD80	0.730762261704504	10.5772964285714	17.5531892857143	1.48332037644091e-05	7.54785023482062e-05
LOC283861	-0.139473014859546	37.9385928571429	34.4425785714286	0.211782622738552	0.285329491024699
CNNM2	0.210940920393498	6.80140357142857	7.87223571428571	0.122110209627572	0.181923151450074
OLFM3	-0.0235670395566305	2.96400714285714	2.91598214285714	0.407909672082392	0.479660601959416
VSTM2A	-0.22273595647919	4.02255357142857	3.44708214285714	0.000186775363901421	0.000700341429171824
TTC12	-0.146328982046917	25.6907357142857	23.2127785714286	0.00190014177526266	0.00528375152353772
C2	0.285773733232346	3.82233571428571	4.65967142857143	0.00224163518587589	0.00609686742561258
DPYD	-0.173846732479202	20.3619392857143	18.0503678571429	5.69172070404728e-05	0.000245024176687861
TMEM126B	0.104166641629959	6.89455	7.41076785714286	0.0227379345736014	0.0444324016049055
RHOF	0.076169986287514	15.3800535714286	16.2138928571429	0.106888569141769	0.162833486088919
DNAH14	-0.00238857404311221	2.30788928571429	2.30407142857143	0.844105026102714	0.864656082643356
GPRIN2	-0.190095563902995	21.5048571428571	18.8500321428571	0.00121023951667905	0.00355874654598843
SPAG9	0.169395704299152	10.3638142857143	11.6550142857143	0.0130409735054824	0.0276927676396271
MBP	-0.282562350529832	70.7454285714286	58.1619071428571	0.000553264951502323	0.00180051455768778
APOBEC4	-0.141978946415034	5.71703928571429	5.18121071428571	0.0562450797022128	0.0955686954181156
FAM13C	-1.64865048038523	139.612614285714	44.5278178571429	2.58588051633748e-11	1.41408241259044e-09
WDR20	0.0774622828029696	7.52053928571429	7.935375	0.826293419422692	0.848587743739624
KIAA1430	-0.00919024249937728	2.44377857142857	2.42826071428571	0.597046099904736	0.648428954751305
YIF1B	0.53026085876399	20.4686964285714	29.5606928571429	4.5597957376564e-08	5.23313216898169e-07
SETD6	0.31555722246582	46.4246714285714	57.7751428571429	0.00127963027035934	0.00373271060118742
GPR62	0.0480171867142989	21.9243142857143	22.6663	0.250141887746753	0.325209041060605
PGM5	-0.184075959211646	3.51855714285714	3.09707857142857	0.0016076222345932	0.004577786511127
KCTD17	-0.0379407674614463	26.0893285714286	25.4121607142857	0.52038757077133	0.580668678700499
DYNLRB1	-0.0391241034283767	4.82418214285714	4.69511428571429	0.478942394730693	0.543769200626913
CELF2	0.0251541170219918	4.95131785714286	5.03840357142857	0.690340000198034	0.730958394165757
APBB1IP	0.103136723107102	4.40164285714286	4.72783214285714	0.0096209075157658	0.0213223652483141
SUV39H2	0.566116171976504	52.6375785714286	77.9316464285714	0.000106503700800894	0.000425191062073065
CYB5R3	0.310407668744341	25.9464464285714	32.1751	1.61947647056981e-05	8.15829101325134e-05
BPNT1	0.114532928772879	23.106475	25.0156357142857	0.4016549257086	0.473075645189843
ETV4	0.131525753212251	9.06128571428571	9.9262	0.0473851594356172	0.0829867700377331
PSMD10	0.477660499154433	153.683357142857	214.001578571429	0.00136134293503319	0.00393204593068205
ZNF70	0.00332733340531899	34.7151892857143	34.7953464285714	0.617198878228339	0.667042919346878
MYO18B	-0.105213997769306	9.69551428571429	9.0136	0.21786708071809	0.292039588879968
LRRC48	-0.0153428768653572	15.3866357142857	15.2238678571429	0.915856574833367	0.927470221705357
RHOBTB2	0.296353401456162	14.6430214285714	17.9821642857143	3.20990061785988e-05	0.00014841845483017
TTC30B	0.634900779019738	9.74395	15.1307071428571	1.92742420674387e-05	9.53707703701672e-05
LENG9	-0.131601729115598	17.3751178571429	15.8603107142857	0.00533941437263258	0.0129362365618802
PCAT4	-0.242428421684949	23.2550142857143	19.6579571428571	0.000769599835295046	0.00240009450550384
ARHGAP27	-0.303377801073896	15.1418821428571	12.2702678571429	0.0195703142437525	0.0390612619391242
SYMPK	0.194535378137563	75.064925	85.9009642857143	0.0039054777992785	0.00984651258829293
LIG3	-0.0273924064696036	65.0664785714286	63.8427178571429	0.666506966112184	0.710307529652138
LMNA	0.678276414336601	53.5374035714286	85.6719892857143	4.46562756006945e-05	0.000198458790537064
NKAIN2	0.292857965308282	4.79835	5.87828928571429	0.00636317378364634	0.0149626496425897
RBM8A	0.114977838737293	33.1377321428571	35.8867857142857	0.118157078619365	0.17696802935751
MBTPS2	-0.116999848983828	5.83161785714286	5.37735357142857	0.000988390208545514	0.00299502810878542
CEP120	0.0446891656263884	3.22508928571429	3.32655357142857	0.611446790065376	0.661292787314286
CNKSR2	-0.0992346234363337	4.30031428571429	4.01446428571429	0.0324746502152564	0.060191016159176
TGOLN2	0.0584066091328204	64.5059964285714	67.1710642857143	0.608396633829791	0.658391182334827
LOC100287896	-0.023232967724919	30.70175	30.2112928571429	0.374687780781764	0.44728776538157
KIAA0226	0.0235721982878569	4.87046071428571	4.95069285714286	0.682042204236569	0.724128789858953
PTBP2	-0.128914986560404	3.49434285714286	3.19564285714286	0.489134496939558	0.552849463722061
SERPINB8	-0.204650049158676	52.2645571428571	45.352525	0.000319722690398389	0.00111747172533462
AGFG2	-0.0699846944551936	8.19298928571428	7.80503571428571	0.243437706970906	0.318213229933619
DGKE	0.142244284832405	3.9879	4.40112857142857	0.000180019828039469	0.000676568925732425
SIRPB1	0.151392838033467	4.659075	5.17456071428571	0.00895440519047162	0.0201217593428989
BCL6B	-0.212815287997483	35.0544964285714	30.2468357142857	0.000155285500411	0.000593732076819872
ASCC1	0.456284828984104	33.3435714285714	45.7475178571429	9.0774386106162e-07	6.83407446874673e-06
ZNF57	-1.04710299164313	148.146582142857	71.6939035714286	1.41120546815253e-09	3.04127712041874e-08
EPHA7	0.399526038506507	3.09991428571429	4.08901785714286	0.993462447142103	0.994549533309293
MYT1L	-0.119528893443073	4.53283928571429	4.172425	0.0108281343939431	0.0236731206796506
PDS5B	-0.080083077214792	2.62971785714286	2.48772142857143	0.0136515635249562	0.0287704907031529
NPAS3	-0.151512992857612	21.2258714285714	19.109775	0.00174842267425428	0.00490480766904074
CBFA2T2	0.142260870683544	15.233075	16.8117285714286	0.0224012957552684	0.0438433942540225
PALM2	0.229014867405918	4.57776071428571	5.36529285714286	0.00668555145262657	0.0155910275082841
RNF32	-0.225379364521651	19.7935964285714	16.93085	1.92742420674387e-05	9.53707703701672e-05
RGS11	-0.188755475469326	5.66785357142857	4.97276071428571	0.000143642047019609	0.000554891089096949
OSBPL1A	-0.0232890250233835	20.3208285714286	19.9954285714286	0.776021529903408	0.804848989823368
DUOXA1	-0.764414906678386	103.872975	61.1491964285714	2.0639970326987e-06	1.37836444313672e-05
RP3-412A9.16	-0.192297596515732	12.4392607142857	10.886975	0.0214210736006004	0.0421863186869073
MAST4	0.0949836083233979	17.3671714285714	18.5490642857143	0.110547711354912	0.167395622166858
RPRML	-0.218955170495524	10.2280607142857	8.78782142857143	0.00173753919550187	0.00487750921798728
C20orf26	-0.0207977055073689	21.3635035714286	21.0577392857143	0.786862194357854	0.815492880469895
NEK4	-0.0377001976521569	17.3552785714286	16.9076285714286	0.110547711354912	0.167395622166858
CNST	-0.449941069862772	21.2222321428571	15.5362178571429	0.0060229439122623	0.0142720369516523
C17orf47	-0.0447455751939168	10.3991535714286	10.0815714285714	0.571831933856215	0.627290027793856
NAIF1	-0.0158297685740405	6.77801428571429	6.70405	0.801056142948135	0.826640879325696
ZNF586	-0.0396590941296413	4.50972857142857	4.38744642857143	0.117589994282418	0.176631205124481
LOC100130950	-0.126465322073293	12.1121178571429	11.0955857142857	0.0286928998837027	0.0541587442239387
METTL8	0.547544342350409	82.6476571428571	120.797464285714	7.20713343673745e-06	4.05111726219587e-05
FAM151A	-0.240322922089967	6.53599642857143	5.53308571428571	5.69172070404728e-05	0.000245024176687861
GGA1	0.447547443857906	5.27655714285714	7.19574642857143	0.0029471622790404	0.00773159728664088
SRRM2	0.350272433478775	41.4096035714286	52.7890178571429	2.71345651143695e-05	0.000128467293403893
TTC26	-0.124498309543387	6.18033214285714	5.66936071428571	0.0116154666336266	0.0251351808988742
SYCE1	-0.0437836623132704	5.24484285714286	5.08806071428571	0.254742899975198	0.330743803200927
SRGN	0.0656816779687062	6.77385	7.08937142857143	0.271010783922649	0.346780411158777
CMTM4	0.0774927404524002	17.4426607142857	18.4051928571429	0.126164214861332	0.186949536417194
HNRNPDL	0.240752784865448	81.9417535714286	96.8231178571429	0.106888569141769	0.162833486088919
LAPTM4B	1.59603085548428	11.4762678571429	34.6939571428571	7.48441831263361e-12	5.88820612454517e-10
MGC50722	0.0612560354417706	16.5313964285714	17.248425	0.143416830688969	0.207516093796708
CEMIP	-0.0377257226333563	14.8564714285714	14.4730178571429	0.619840744462063	0.668519502346888
STAU2	0.0351392302672289	2.71698928571429	2.78397857142857	0.45890510903359	0.525189748133131
NLGN4X	0.0551435514541816	8.38425714285714	8.71092857142857	0.509858600044535	0.571208975793674
TACC1	-0.477494689750017	232.564775	167.03355	0.000167231680593386	0.00063379728803686
PACSIN2	0.171682463592205	45.5242142857143	51.2771678571429	0.00233844600400567	0.00632522147019069
CCNY	-0.00168620159171162	5.68076071428571	5.674125	0.838980314826769	0.859906063671005
TYMS	0.413305240981019	23.8350321428571	31.7419071428571	6.15680745462548e-05	0.000262054086452612
ADAMTS9	-0.076358656376502	4.85797142857143	4.60753571428571	0.0946200740187156	0.147344855374389
L3MBTL4	-0.242472482472277	12.2151928571429	10.3254464285714	0.00106043517098229	0.00316798271082696
CDH7	-0.0249756667404917	2.23323214285714	2.19490357142857	0.286802318505917	0.362472228518407
TBC1D16	0.443320003876281	39.6551392857143	53.920275	6.67523064715468e-05	0.000280962422803768
NALCN	0.0734082309659829	6.71695357142857	7.067575	0.0699619321827051	0.11463335171745
ATP8B3	0.164502108384283	9.16341428571429	10.2701642857143	0.0541644251774418	0.0926283746596425
SCARA5	-0.0477171240798597	16.9586357142857	16.4069035714286	0.491289719125688	0.554752124952349
OR2L13	-0.0393875311001963	2.61067142857143	2.54036071428571	0.0914355778230612	0.14337960384332
SPATA6L	-0.169449725233708	4.9305	4.38411071428571	0.00372544164711542	0.00946476849674714
KCNMB1	-0.0701391860638902	7.89977142857143	7.52489642857143	0.340493222176202	0.41503617445657
CALHM3	0.023157124460079	7.31708928571429	7.43548571428571	0.676041061353374	0.719707076886234
GLYATL2	-0.372274292230542	34.3485428571429	26.5364357142857	0.130320502774485	0.192019271754956
RELL1	-0.0409002745185627	6.96376785714286	6.76911785714286	0.793171963284112	0.820264770278619
LINC00593	0.0108793913126783	16.204075	16.3267321428571	0.947736421847632	0.955002607835437
PDE4D	-0.0444538687921079	4.46005	4.32471785714286	0.0105663926197968	0.0231491512083444
NDUFA10	-0.0104112166261112	11.5067035714286	11.4239642857143	0.666506966112184	0.710307529652138
TAF2	0.514929083440938	82.3966928571429	117.738603571429	1.49837600684998e-08	2.13249034518938e-07
TRPM3	0.0644882078214721	2.87728928571429	3.00882142857143	0.111917789008492	0.169304258594142
RABGAP1L	-0.085051520230468	6.20938928571429	5.85390714285714	0.129561247987555	0.191711063964045
ZNF655	0.408177213843462	9.58147857142857	12.7147	0.0931877147545561	0.145340968925541
SLC9A1	0.132383624672495	4.45804285714286	4.886475	0.00520445199304844	0.0126216460787265
MCTP1	0.00470759015104427	17.1983285714286	17.2545392857143	0.928764737883781	0.938879777780485
LOC728175	-0.0749562714170806	10.6262285714286	10.0882321428571	0.179031284273333	0.248627801632426
TRIM7	-0.0285148523461438	8.63287857142857	8.463925	0.566272939993652	0.621546300974309
ARHGAP29	-0.0198524518096059	7.07625714285714	6.97955	0.481030513871582	0.545759329065796
FBN2	0.0274562514255825	8.42935357142857	8.59131071428572	0.646349564558237	0.691996551563007
IPP	-0.067024032039348	4.48988571428571	4.28606785714286	0.0995717112267389	0.153688002961255
FGF7	-0.308610170734458	122.427435714286	98.8502642857143	0.072580343196597	0.118264382743269
PMS1	0.208820991703662	3.34685357142857	3.86810357142857	0.0170520460113386	0.0347326708121231
RALGPS1	-0.00471460267199619	4.53081428571429	4.51603214285714	0.700155594069167	0.740472700377791
SEPT2	0.35995214627694	47.4710607142857	60.9235678571429	0.0148182272591936	0.0308083449736039
CLCNKB	0.002908418107193	22.3630714285714	22.4082	0.666506966112184	0.710307529652138
INPP5A	-0.267702112121681	7.47725	6.21091428571429	2.03766167495749e-05	0.000100669979371024
CD99L2	-0.00210880537523472	4.457425	4.45091428571429	0.934697932204126	0.944336293466173
SRCIN1	-0.130982302784513	26.90595	24.5707678571429	0.000240708133762785	0.00087227846486675
HEATR2	0.186772904926088	5.04302857142857	5.74005	0.0141321966428457	0.029591340412837
CLDN22	-0.145818554900842	32.6148035714286	29.479425	0.0374769713973468	0.0677248010999958
LINC00301	-0.0203723906246913	2.19581071428571	2.16502142857143	0.228398563669496	0.303601014140088
MAD2L1	0.682898734433576	13.238175	21.2520642857143	0.000193703453580238	0.000721207985242536
ZNF785	0.23823935697056	11.2401607142857	13.2583571428571	0.0178816367369735	0.0361456389716393
RP11-690I21.2	-0.175309909764131	14.8502892857143	13.1510785714286	0.0602404893106144	0.101244399244007
WFIKKN2	-0.0338045246346215	9.45677857142857	9.23776785714286	0.410892410318653	0.481437054566142
MINA	0.220996194992653	14.6549107142857	17.0808571428571	0.151608554020939	0.217820219195189
ZFP42	-0.000934480705956586	3.67333928571429	3.67096071428571	0.960787360737997	0.966315643349351
PHLDB2	0.0525121856867587	2.35948571428571	2.44695	0.131646526840717	0.193780433548736
PHTF2	0.353506353861052	15.6632178571429	20.0123	6.1014033404587e-06	3.51740667104679e-05
MGC32805	0.215354617198801	4.19739642857143	4.87313214285714	0.298069587254518	0.374609339929174
KLHL30-AS1	-0.100461843603195	21.524625	20.0767571428571	0.0652486328430211	0.108090553178619
ARHGEF2	-0.149653967838954	7.31402142857143	6.59334642857143	7.81424680405529e-05	0.000323499423149887
CNTN1	0.000828717640487753	4.60578214285714	4.60842857142857	0.585791328686825	0.638861215614495
CASS4	0.0114086701935632	3.08413928571429	3.108625	0.793168509015495	0.820264770278619
STKLD1	-0.308732722344754	14.5264464285714	11.7279357142857	4.49597335453972e-05	0.000199639706466899
PDE8B	-0.133624131383404	3.36596071428571	3.06820357142857	0.00636317378364634	0.0149626496425897
KANSL1L	-0.178591552220845	13.6466892857143	12.0577392857143	0.00127963027035934	0.00373271060118742
UBE3C	0.130840249582192	2.52935	2.76946428571429	0.00917144839473111	0.0204790160022041
FBLIM1	0.579760247538087	22.4946107142857	33.6204642857143	0.000155285500411	0.000593732076819872
DPP6	-0.08725742918962	14.7152107142857	13.8515821428571	0.162392035135763	0.229603329741993
SNED1	-0.139053769728123	11.9087357142857	10.8144964285714	0.0060229439122623	0.0142720369516523
RAB39A	-0.0221440950267384	12.0191678571429	11.8360928571429	0.549753319026476	0.607700678535247
FNDC9	-0.00385423835147902	4.60218214285714	4.58990357142857	1	1
TRIM72	-0.017668440011354	18.3542642857143	18.1308535714286	0.4016549257086	0.473075645189843
FBXO8	-0.75609506000552	81.2262285714286	48.0937892857143	1.9375578244107e-07	1.80796015158746e-06
SPIRE1	0.202331409072527	16.0002464285714	18.4091821428571	0.0182875000338308	0.0369186648112145
ACP1	-0.0967721530258885	5.09083214285714	4.76055357142857	0.0531524913449946	0.0913856669375352
LOC389199	-0.0904906263148946	16.4359821428571	15.4367285714286	0.0496669167368866	0.0860570622975873
PLA2G4C	-0.00431380408528215	11.5050892857143	11.4707392857143	0.652244888075296	0.697813991524063
CLDN20	1.03526665074366	5.26090714285714	10.7821892857143	0.00793758762018463	0.0181250719471264
UBE2O	0.0384990965141974	26.9945071428571	27.7245678571429	0.392541182812519	0.464409048069171
ASTN2	-0.0148293551089882	3.29682857142857	3.26311428571429	0.31618275443615	0.391743787373821
DZANK1	0.0237260261752672	7.84066071428571	7.97067142857143	0.45890510903359	0.525189748133131
ITGA11	0.104829449386808	17.65455	18.985125	0.0359595094417378	0.0654464308836857
AGBL3	0.00742329909443562	2.5754	2.58868571428571	0.528103264086197	0.588502415768321
ZBED1	0.498104715389232	34.045775	48.0847857142857	0.000769599835295046	0.00240009450550384
ZNF585A	-0.118580370458921	5.49117857142857	5.05788928571429	0.0429897982671811	0.0762673401566228
ADCY7	-0.0884686425207137	17.9356035714286	16.8688035714286	0.072580343196597	0.118264382743269
PDGFRA	-0.0964671052146144	6.77186428571429	6.33386428571429	0.044704750921411	0.0788274157431945
STEAP3	0.605224749872096	7.90973571428571	12.0324142857143	1.69555042805536e-05	8.53136797644688e-05
MCTP2	0.522852842855118	20.0899964285714	28.8651785714286	0.0128423284515789	0.0272846297581331
RASSF5	-0.17676798266674	9.71310714285714	8.59301785714286	0.00278297036230825	0.00735513908070601
B3GNT5	0.440384726247224	18.4996535714286	25.1034035714286	0.00865103871195174	0.0194747295246287
USP36	-0.0174541815746667	6.78710714285714	6.70548928571429	0.81218110123127	0.837182243697695
CYP4A11	-0.232126005696449	27.2076678571429	23.1640464285714	9.13096238235293e-05	0.000371113034180401
CIDECP	-0.0389922155081073	12.5242678571429	12.1903035714286	0.189868084150703	0.261141110345183
LOC280665	-0.123555491183329	11.33565	10.40525	0.00575675725015875	0.0137406096907782
CCDC158	0.07077359112896	3.97803214285714	4.17804642857143	0.0995717112267389	0.153688002961255
TOR1A	0.0629733361916114	5.32771071428571	5.56541428571429	0.256971821281798	0.332332843668216
VWA5B2	0.0739827609947632	7.41631071428571	7.80654642857143	0.207010086402371	0.280194340237592
KIAA1257	0.2663431833032	15.0521678571429	18.104075	0.00909882895114321	0.020333528732106
PARK2	0.0169942423555738	2.76059285714286	2.79330357142857	0.501657975910512	0.564120215088413
ELMO2	0.0650089394092541	13.4289785714286	14.0479392857143	0.161184589358532	0.228798005539916
CMAHP	-0.0487795985167288	3.23753214285714	3.12989642857143	0.25134100824835	0.326567396706768
DOK5	-0.0407244965026106	27.9905428571429	27.2114714285714	0.608396633829791	0.658391182334827
SDC3	0.0451757058836253	8.62743214285714	8.90186071428571	0.293022308659156	0.368879371730041
TMEM135	-0.00921192414679517	2.96493214285714	2.94606071428571	0.475944993282129	0.541732043932109
PRR16	0.0736705691096833	13.4052928571429	14.1076071428571	0.143416830688969	0.207516093796708
PCNP	-0.0612193861762682	89.77415	86.0443642857143	0.619840744462063	0.668519502346888
WDR37	0.0452108121018897	28.5497142857143	29.4585642857143	0.533474787941053	0.592522669108665
HMGCLL1	-0.197552496301963	7.92549285714286	6.91125714285714	0.0006320715269852	0.00202153993132655
CSPP1	0.518107733565825	6.67076428571429	9.55303928571429	0.000988192307272406	0.00299502810878542
MITF	-0.0654338236872856	3.113375	2.97532142857143	0.106493002627909	0.162767242526241
CAMKMT	0.119710979319569	4.25567857142857	4.62386785714286	0.374687780781764	0.44728776538157
S100Z	-0.0279674768514728	6.42578214285714	6.30241428571429	0.420252829793535	0.489936133802709
ABCD3	0.437130507070966	16.2960892857143	22.0634178571429	0.110547711354912	0.167395622166858
DKFZP434K028	-0.0290615579536029	14.3733571428571	14.0867178571429	0.560740008682307	0.617362439066885
ERCC8	0.117029577259256	2.74625	2.97830714285714	0.0606062619752481	0.101745335361632
PRIM2	0.159546013883331	2.70396071428571	3.02015	0.00833053610375298	0.0188600470121483
MLXIP	-0.0531752879702663	7.56757142857143	7.29372142857143	0.224074100898975	0.298544459665387
LOC101927746	0.215736695762524	3.95147857142857	4.58883928571429	0.031712744289654	0.0588561613085984
TIA1	0.0123446406870342	3.129075	3.15596428571429	0.294281427338389	0.370112191523286
LOC101927129	-0.0607834957050182	6.38000357142857	6.11678571428571	0.224074100898975	0.298544459665387
MS4A3	-0.0553249826058662	3.85257142857143	3.70762857142857	0.15157358399929	0.217820219195189
PCBD2	-0.37595332787036	68.8984392857143	53.0928642857143	4.11480597869535e-05	0.000185083185817491
FCER1G	2.04881664445339	75.6056142857143	312.830660714286	5.35718780361258e-09	9.08446838844976e-08
GAFA1	-0.0598965940589153	3.51573928571429	3.37276428571429	0.130320502774485	0.192019271754956
FRMD8	-0.149404087869831	84.6063535714286	76.2830178571429	0.0516493812206826	0.0889386374917255
MPHOSPH6	0.886614188083353	18.0098428571429	33.297175	0.00163559624014079	0.00463003253479127
HYDIN	-0.153852906331902	6.34860714285714	5.706425	0.00117595313496005	0.00348699680470219
HYDIN	-0.0817596623969239	3.92344285714286	3.70727857142857	0.0995774968802707	0.153688002961255
CCDC36	0.0256027460570216	5.17337142857143	5.266	0.776021529903408	0.804848989823368
PRKD3	0.0341053378857969	4.97531785714286	5.09433571428571	0.481030513871582	0.545759329065796
ABCC11	-0.242139263014389	21.2244	17.9450321428571	8.660621868979e-06	4.73603980912668e-05
ESYT3	0.282748194881081	3.83542142857143	4.66582857142857	0.00685171112494027	0.0159528261899624
PLA2G4D	-0.0958424144133416	8.37315357142857	7.834975	0.00956681342523425	0.0212158097577525
PDE12	-0.0889056071558731	9.51165357142857	8.94319642857143	0.194256463521363	0.266070127338205
JRK	-0.0506173374795789	6.31955	6.10167142857143	0.211782622738552	0.285329491024699
ABCC4	0.23099830956216	4.75157857142857	5.576675	0.00482287024272121	0.0118548041436132
C7orf63	-0.0467350091849656	24.4449142857143	23.6657285714286	0.24797094031553	0.323579295221209
SCEL	-0.077182977089139	2.26235714285714	2.14450357142857	0.00685266400724067	0.0159528261899624
ZNF678	0.0108632242075219	2.407025	2.42521785714286	0.611452878238716	0.661292787314286
ANKS6	0.177967184231457	4.00205714285714	4.52748214285714	0.000769599835295046	0.00240009450550384
LINC00598	-0.0489310046237099	5.08013571428571	4.910725	0.222146490766518	0.297117246040057
SIK3	-0.0334549713860754	5.56535714285714	5.43778571428571	0.348851682195935	0.423177126579879
FUT8	-0.0850238878734308	15.9809535714286	15.0663464285714	0.172550789422498	0.241338467817614
ZSWIM2	0.00904043786102893	2.85610714285714	2.87406071428571	0.631376180476578	0.678747033801982
RCBTB1	-0.0660068615502425	4.45214642857143	4.25303928571429	0.0511601839302309	0.0884843162812784
ACOT11	-0.109925839653443	14.7954392857143	13.7099821428571	0.0780535875201098	0.12550716526841
LOC388882	0.055617717346979	18.2928464285714	19.0118285714286	0.271010783922649	0.346780411158777
KLHL14	-0.0173434625409681	4.20904642857143	4.15875	0.509858600044535	0.571208975793674
VIL1	0.037866529104484	15.5041071428571	15.9164321428571	0.278220585564391	0.354036573405039
LINC01234	-0.0418389511296693	3.955	3.84195	0.383551914777674	0.455914916447984
LOC554174	0.0235980682547492	13.4452857142857	13.6670178571429	0.702372592230599	0.741288209125083
ACAN	-0.116612235071381	12.8156821428571	11.8205571428571	0.0496669167368866	0.0860570622975873
NLRP12	-0.0539880263595451	8.728825	8.40821428571429	0.263927981321902	0.339544551289691
C21orf90	0.0218478910997435	16.996	17.2553428571429	0.658162019556122	0.703042742775399
ZNF641	0.149176846954071	11.3950321428571	12.6363678571429	0.172550789422498	0.241338467817614
C1orf110	1.57442238781443	20.3794214285714	60.693225	0.00247896791815934	0.00665850971595458
FGFR4	-0.0740308946236854	15.5931321428571	14.8131642857143	0.501665286016346	0.564120215088413
FILIP1L	-0.0910399867963199	2.93870357142857	2.75898928571429	0.00460567850246415	0.011336354285607
PDILT	-0.295077177038272	5.20650357142857	4.24345	0.194256463521363	0.266070127338205
OK/SW-CL.58	-0.2009507957839	5.88643214285714	5.12106071428571	6.16532295254715e-05	0.000262054086452612
ZBTB26	0.216175379079044	14.3324035714286	16.6492357142857	0.293022308659156	0.368879371730041
ACY3	-0.0999029921398749	9.77425357142857	9.12031428571429	0.134580461474354	0.197061254146665
LINC00051	-0.149656560962572	3.72395	3.35701071428571	0.000591471286115851	0.00190725382112902
ERICH1-AS1	-0.0464405668413286	10.2935642857143	9.96748928571429	0.278220585564391	0.354036573405039
LINC00317	-0.0470545206122579	8.256025	7.99109285714286	0.420252829793535	0.489936133802709
HLA-DOB	-0.0205429500667966	17.0561464285714	16.815	0.392541182812519	0.464409048069171
SNX19	-0.717002807763006	6.66857857142857	4.05689642857143	1.20866857904814e-09	2.67843488360165e-08
GOLGA3	-0.0958010615407576	11.0313392857143	10.3226035714286	0.106888569141769	0.162833486088919
SLC9C2	0.0108594685199424	2.53548571428571	2.55464285714286	0.365949367121097	0.439359304270935
AREL1	0.000721276880055299	18.7185821428571	18.7279428571429	0.915856574833367	0.927470221705357
RASGRF1	0.00587835378587354	11.9873464285714	12.0362892857143	0.838980314826769	0.859906063671005
RAG1	-0.037759642290732	2.91496428571429	2.83966071428571	0.258176685478837	0.333544545191907
LOC285902	-0.254908312751884	4.42989642857143	3.71243214285714	0.000561649917090586	0.00182667853010421
PTGS2	1.10670303211299	8.73525	18.8116178571429	0.000933863225311252	0.00283630129696642
OK/SW-CL.36	-0.136215414749545	7.67224285714286	6.98099642857143	0.00634877124413062	0.0149437265976572
MGC39545	-0.0590097891974766	2.43173214285714	2.334275	0.0458899946722608	0.0805148364491009
RBL1	0.0937097095618511	4.24507142857143	4.52996071428571	0.0931877147545561	0.145340968925541
WDR66	0.153279590227616	10.0063071428571	11.1279607142857	0.363094141511427	0.437445139292174
SYNJ2	-0.0124668854714161	9.11395	9.03553214285714	0.76801822802505	0.798230515651416
ZNF398	-0.11809422144267	10.3978857142857	9.58065357142857	0.0105663926197968	0.0231491512083444
IL16	-0.0724758316439447	15.6985464285714	14.9293892857143	0.285557682443612	0.36124438003193
OR2C3	-0.0590020164836376	2.66368214285714	2.55694285714286	0.149276691825681	0.214654826786978
ARHGAP20	-0.133232276624697	12.3487535714286	11.259425	0.0406728541997739	0.0726563360707196
SCARF1	-0.0804732039286726	14.6935	13.8963392857143	0.15874879553288	0.225552249738996
RGS12	0.0342572639776162	3.38215357142857	3.463425	0.410892410318653	0.481437054566142
ADAM22	-0.0487074961916476	2.63538571428571	2.54789642857143	0.149283643181531	0.214654826786978
TMEM26	-0.026927070099805	3.14182142857143	3.083725	0.460859122645424	0.527206688915948
LOC101927705	0.0606878047672068	7.98322142857143	8.32620357142857	0.250141887746753	0.325209041060605
BRD3	-0.127003003809444	7.21789642857143	6.60965714285714	0.00541535202592637	0.0130292286180855
CLRN1	-0.00455258451995144	2.84182857142857	2.832875	0.780566388766683	0.809205764939224
IDH1	-0.606360981016264	563.270489285714	369.985032142857	0.000144130620269618	0.000554891089096949
EPB41L4A	-0.387646773801409	3.96716071428571	3.0324	0.00865103871195174	0.0194747295246287
LINC00612	-0.217190975172454	6.37876071428571	5.48725714285714	0.00200850520621826	0.0055440192616665
NAGA	0.232683623280968	126.451685714286	148.583085714286	0.0838523369379733	0.133175760346591
TRPV5	-0.102845966610986	17.9887857142857	16.7510535714286	0.031712744289654	0.0588561613085984
LHFPL5	-0.0179235349912128	9.93606785714286	9.81338928571429	0.501665286016346	0.564120215088413
KLHL40	-0.025149147763778	8.70443928571428	8.55401785714286	0.541771224709468	0.599974067426817
C10orf53	-0.0619092352139914	13.1241	12.5728285714286	0.243437706970906	0.318213229933619
SYT9	-0.062459132605317	6.21233928571429	5.949125	0.407925696454452	0.479660601959416
AVL9	-0.0178427155082128	2.43490714285714	2.40497857142857	0.549739679188758	0.607700678535247
CCNG2	-0.0862778281335084	17.8967821428571	16.8578714285714	0.0809115035082159	0.12923747472903
LPGAT1	0.62441680025272	36.7043035714286	56.5828964285714	1.35789895891035e-05	6.9750523464611e-05
IKZF2	-0.0827562070176406	16.3018571428571	15.3930607142857	0.15748225616062	0.223842903292847
GTPBP3	0.367188932038576	10.1649321428571	13.1111071428571	2.95198793568081e-05	0.000138031199034054
USP32	0.128022676153071	15.6113464285714	17.06	0.0082227109763134	0.0186313953310193
WNK1	0.383060725505207	4.62953571428571	6.03740357142857	0.0060229439122623	0.0142720369516523
TLL1	-0.029935551162686	3.88430357142857	3.80453571428571	0.184390758558079	0.254766705188002
MGC40069	-0.00966594307604351	3.49466428571429	3.47132857142857	0.31618275443615	0.391743787373821
KCNH5	-0.0574619420861264	5.03333571428571	4.8368	0.0674202756474771	0.111131341500705
ARHGAP25	-0.150696777517916	17.4556357142857	15.7243035714286	0.000821172578610194	0.00253774463801512
RPL13AP17	-0.135116436702543	55.1234214285714	50.1951857142857	0.00278297036230825	0.00735513908070601
LOC101928751	-0.0755768269948485	4.57507857142857	4.34157857142857	0.0931877147545561	0.145340968925541
STAT5B	-0.0779834326974775	33.7417857142857	31.966325	0.21786708071809	0.292039588879968
PPM1F	0.0492155673020287	4.88925714285714	5.058925	0.278220585564391	0.354036573405039
VASH2	-0.610757008539871	12.8521428571429	8.41626428571429	2.14256690785357e-07	1.98918326154442e-06
C6orf123	-0.0855089828102455	4.52677857142857	4.26627142857143	0.0780535875201098	0.12550716526841
STPG2	-0.199239521625336	9.76633928571429	8.506575	0.00144774913731862	0.00415552895606591
PTGFR	0.0603417540514044	3.10487857142857	3.23749642857143	0.786862194357854	0.815492880469895
CACNB2	-0.0281522539772205	7.63335357142857	7.48584285714286	0.385103104713965	0.457331736783053
APLF	-0.032877547874218	12.6370392857143	12.3523107142857	0.517443516922891	0.578879164171864
MIER1	-0.152476541092174	33.7267964285714	30.3441571428571	0.0141321966428457	0.029591340412837
CTDSPL2	-0.0830499721967393	2.86536428571429	2.705075	0.08531482535457	0.135356297247077
UVSSA	0.0481620525470143	11.6929571428571	12.0898964285714	0.31618275443615	0.391743787373821
SLC10A7	0.0474827043609216	5.39661785714286	5.57718928571429	0.690340000198034	0.730958394165757
KLHL3	-0.120880808553749	3.96201428571429	3.64357142857143	0.0134738698417713	0.0284209615729499
ATP6V0A2	0.21485458329505	4.32251428571429	5.01665357142857	0.000114947328822346	0.000455890239855193
SLC11A1	-0.0574014277349355	3.70222142857143	3.55781071428571	0.290525680209579	0.366915018814544
ENTPD3	-0.173997758765178	9.38627142857143	8.31983214285714	0.00909882895114321	0.020333528732106
CD96	0.438325228307088	5.92986428571429	8.03514642857143	0.0141321966428457	0.029591340412837
GPR125	-0.0696620179461527	2.71508214285714	2.58709642857143	0.0278967184391927	0.0527547361566111
LINC01126	-0.00129963910596231	7.61932857142857	7.61246785714286	0.818542761602169	0.842221920643072
PAXBP1	0.168620279314882	18.4120214285714	20.6948	0.489134496939558	0.552849463722061
MOCS1	-0.290411697299141	4.960025	4.05565714285714	7.81424680405529e-05	0.000323499423149887
PER3	-0.195882043389703	2.74659642857143	2.39788571428571	2.66620307331768e-06	1.72779327592123e-05
LOC101928787	0.0980551511945209	7.53706071428571	8.06713928571429	0.106493002627909	0.162767242526241
FGD6	0.303440741542776	8.63518928571429	10.65655	0.000512629094500599	0.00169724179081918
OTUD7B	0.0308267910723155	11.3292285714286	11.5739107142857	0.646349564558237	0.691996551563007
BCL2L2	-0.179778007417035	19.7294464285714	17.4179214285714	3.78972315644695e-05	0.000171885793313088
ATF2	-0.0640769998238959	2.43694285714286	2.331075	0.0263853571678429	0.0505104761413894
FCHO2	-0.671820704793965	25.5946178571429	16.0661	0.0121681822192854	0.0261845057823533
QKI	0.12607432983761	13.8974642857143	15.1665821428571	0.110547711354912	0.167395622166858
MLLT6	-0.0787651249713908	14.5908214285714	13.8155785714286	0.143416830688969	0.207516093796708
ARHGAP8	-0.0475356992140479	5.19357142857143	5.02523571428571	0.25134100824835	0.326567396706768
KIF26B	-0.11527377422679	18.7781964285714	17.3361642857143	0.00956681342523425	0.0212158097577525
PGPEP1	0.0341205135471987	11.3202642857143	11.5911857142857	0.643000625732351	0.688654971780048
NAMPT	-0.221947630956143	54.9000214285714	47.0716714285714	0.0214210736006004	0.0421863186869073
CALN1	0.00262989646086664	12.1105	12.1325964285714	0.902970204994289	0.916437677359205
ST3GAL3	-0.00395234406788503	3.08344642857143	3.07501071428571	0.960790039143651	0.966315643349351
STX19	-1.38897538187684	91.1930571428571	34.8207821428571	2.58588051633748e-11	1.41408241259044e-09
PBLD	-0.314677452488068	5.90765	4.74993214285714	0.0122366754329478	0.0261845057823533
PRKAA1	-0.0672333088257115	3.93243928571429	3.75338214285714	0.101267457112055	0.155702628298
IGHV7-81	0.018183567103577	4.93436071428571	4.99694642857143	0.749297967900131	0.783210143096111
LOC100132686	-0.0715465493027243	8.63967857142857	8.22166785714286	0.300614635597008	0.376243866174196
TERF2	0.0759230841243623	3.9426	4.15563928571429	0.436332405020449	0.505239842147632
MTUS2-AS1	-0.191806933597045	8.99906428571429	7.87875714285714	0.00220512421997605	0.00599987707217191
TAT	-0.146522936078261	10.1747928571429	9.19216428571429	0.00669007800419259	0.0155910275082841
FHL5	-0.338959757155483	5.88853214285714	4.65553928571429	1.37594261126913e-06	9.72256209759219e-06
ZNF277	0.180240820294828	2.96147857142857	3.35557142857143	0.000353653227562648	0.0012250218885169
FBXO36	-0.0323839389742187	3.70903214285714	3.62670357142857	0.549753319026476	0.607700678535247
LINC00421	-0.126993046341292	14.4657821428571	13.2468678571429	0.0244770832040105	0.0472032542232982
GOSR1	0.0420285687489561	2.81348214285714	2.89665	0.340493222176202	0.41503617445657
RMND1	0.270677342805786	27.7602857142857	33.4892892857143	2.19312425775768e-05	0.000107288693173661
SLC44A4	-0.248948503663049	6.33598214285714	5.33178928571429	0.000155285500411	0.000593732076819872
RP11-498C9.17	0.160735602412541	14.2499607142857	15.9294178571429	0.00233844600400567	0.00632522147019069
LOC100287210	-0.0814702046043987	11.250275	10.6325678571429	0.0617392992721038	0.10353244099675
LOC439951	-0.0950518539120386	7.74841785714286	7.25436785714286	0.00865103871195174	0.0194747295246287
DTWD1	-0.0272154864064516	3.30568214285714	3.24390714285714	0.566272939993652	0.621546300974309
OR8B8	-0.1490459348718	14.5853785714286	13.153775	0.00278297036230825	0.00735513908070601
HRH3	-0.0346540017526804	24.7019178571429	24.1156392857143	0.563577482016544	0.619069358035717
LOC101060604	-0.220994243766294	50.5522214285714	43.3724892857143	0.0148182272591936	0.0308083449736039
UBE2W	0.0603620796312532	3.4746	3.62306071428571	0.694099722457146	0.734320009432957
RGR	-0.176566626491367	20.7556714285714	18.3647464285714	0.000591471286115851	0.00190725382112902
AKR1E2	0.202791872838195	5.67054285714286	6.52636071428571	0.0148182272591936	0.0308083449736039
LOC101927122	-0.0456165525355492	4.77003928571429	4.621575	0.129561247987555	0.191711063964045
CCDC148-AS1	-0.042547696706067	3.55285	3.4496	0.298069587254518	0.374609339929174
C1orf43	0.36008135549169	14.4900857142857	18.598	0.126164214861332	0.186949536417194
C1S	0.269619826947946	4.45761785714286	5.37361428571429	0.000467620453763771	0.00156166193198717
KCNIP2	-0.0602706733532914	4.39613214285714	4.21626071428571	0.357337187090213	0.431319619596771
RHOJ	-0.154903995957855	7.94606071428571	7.13708928571429	0.031712744289654	0.0588561613085984
IQCF3	-0.170387714237168	6.19087142857143	5.50123214285714	0.00127963027035934	0.00373271060118742
PGC	-4.65380311354285	339.753003571429	13.4967428571429	0.20581993495825	0.278858340814433
PTH2	0.00210801914526648	44.4744642857143	44.5394964285714	0.489134496939558	0.552849463722061
GNG12	-0.562018597375737	34.4439821428571	23.3307607142857	9.0774386106162e-07	6.83407446874673e-06
C8orf59	0.615799398477676	119.846667857143	183.653857142857	4.50827303023236e-06	2.71664527730089e-05
LOC554207	-0.0559274938756165	3.56521071428571	3.42964642857143	0.156326811503886	0.223270387164248
SCN1A	-0.0993462587054634	5.49640714285714	5.13065357142857	0.0291230192157034	0.0547314142315896
RAPGEF6	-0.160771063246139	16.7947285714286	15.0236714285714	0.0170520460113386	0.0347326708121231
WNK3	-0.0794493946212524	9.95804642857143	9.42448214285714	0.121482075436149	0.181613814810343
CPEB3	-0.514657492164228	7.80443571428571	5.46278571428571	4.62392206556339e-08	5.29803023679817e-07
OTOF	0.0307487095571859	13.122125	13.4048035714286	0.332262106334436	0.407396463288277
COL25A1	-0.0860896448244703	2.62058928571429	2.46878571428571	0.0082227109763134	0.0186313953310193
ZAK	0.113106683866518	17.5119892857143	18.940175	0.293022308659156	0.368879371730041
MAGI1	-0.167299456759383	20.2232071428571	18.0089285714286	6.8317733318542e-05	0.000287379882770881
ASXL2	0.0716883121463789	7.00365714285714	7.36046428571429	0.45890510903359	0.525189748133131
GRID1	-0.0437433064932158	22.9721642857143	22.2860892857143	0.43933887306239	0.507268731006567
ANO1	0.140523861423588	16.26745	17.9316964285714	0.0345205423527852	0.0632408446859412
WFS1	0.22558354701953	27.2754857142857	31.8918642857143	0.0171104516770196	0.034808083133785
TERT	0.0136537090129289	9.84635714285714	9.93998571428572	0.643000625732351	0.688654971780048
RSPH10B	0.0690241081478673	88.0526928571429	92.3678785714286	0.52038757077133	0.580668678700499
GALNTL6	0.0566307181177059	5.32065357142857	5.53366071428571	0.216002664057179	0.290571089463646
EPT1	0.513977526476436	75.0052535714286	107.106132142857	0.0116560348410694	0.0251351808988742
KLHL6	0.861529576509511	6.020975	10.9398928571429	1.66572040431774e-10	5.80751909663531e-09
SLC4A5	-0.0918318895740717	9.27038928571429	8.69868928571429	0.0602404893106144	0.101244399244007
CKAP5	0.618662212512035	32.5523285714286	49.9824964285714	1.61947647056981e-05	8.15829101325134e-05
ARMC8	1.03384189381177	12.4298107142857	25.4496571428571	9.54495369347815e-08	9.8105806223933e-07
ALS2	0.325266867944286	3.61437142857143	4.52843214285714	0.000205886334300015	0.000765221723356378
CDKL1	-0.043476822807869	8.11016785714286	7.86940714285714	0.43933887306239	0.507268731006567
STRIP2	0.74841869257094	3.88165357142857	6.52098571428571	6.17435381623422e-09	1.02565031250365e-07
VWA3B	-0.061584156423228	5.75182142857143	5.51146071428571	0.126164214861332	0.186949536417194
MED12L	0.0185111101892401	15.123875	15.3191785714286	0.726656563877435	0.762430979739125
FOXJ2	-0.0428094981320584	16.8466	16.35405	0.329543627781428	0.405331384094988
ECE2	-0.0928256534506682	21.6137142857143	20.2668428571429	0.0374769713973468	0.0677248010999958
CARD14	0.198798403584146	7.36895	8.45765357142857	0.000633817951961528	0.00202437206721428
PAK6	-0.409034426430273	174.013210714286	131.054092857143	0.000277644404181922	0.000988025647503281
MCF2	0.022924704377387	2.55753214285714	2.59849642857143	0.594291910620057	0.647465591246806
WDR19	-0.0619477362974987	3.57516071428571	3.42489642857143	0.147995900098742	0.213020283873337
MAK	-0.0315258324962091	4.450775	4.35457142857143	0.522759435715603	0.583007901457067
KCNH7	0.0137016653290787	3.35528571428571	3.38730357142857	0.449062510297533	0.516326736141839
POLK	-0.00514599850360731	2.61494285714286	2.60563214285714	0.333615778067734	0.408663861605053
HIF3A	-0.552360579458531	4.71501071428571	3.21518214285714	0.000133719111191178	0.000519724067977759
STAB1	0.148498725621363	7.356325	8.15386428571429	0.000528507966134639	0.0017343485947135
PP2672	-0.0378211188149025	8.94218214285714	8.71080357142857	0.496463049119781	0.560294769012475
ABCB9	0.176687168957569	19.1860035714286	21.6856607142857	0.00212176298157395	0.00581444468478921
PTK7	0.654407465491199	3.62572857142857	5.70678571428571	3.85477744348408e-12	3.90328492997386e-10
ZNF26	0.266316403626669	9.33904285714286	11.232375	0.000298002484233234	0.00105145491394264
ADAM9	-0.149760965768287	23.7809571428571	21.43615	0.0374769713973468	0.0677248010999958
GCLC	-0.1749531135349	15.3731892857143	13.6175142857143	0.000720992938356498	0.00226418957626333
TPH2	-0.0557453200598781	3.69451428571429	3.55448214285714	0.0594948628308172	0.100349867066915
SLC30A5	-0.259449897135664	23.6979142857143	19.7973892857143	0.0330787325559912	0.0610380344478544
ZNF317	0.0698592587777687	6.58191785714286	6.908475	0.133757725082572	0.19661448287659
AQP10	-0.136498108006569	5.96259285714286	5.42431785714286	0.0214210736006004	0.0421863186869073
RAP1A	0.0962920364161124	7.48256428571429	7.99902857142857	0.365949367121097	0.439359304270935
MEGF10	0.0674763338603981	22.818125	23.9107035714286	0.147995900098742	0.213020283873337
KB-1568E2.1	-0.0944247587975275	2.94392857142857	2.75741785714286	0.0338236270519884	0.0622878142113442
PDXDC1	0.0766495790336099	3.87393571428571	4.08532142857143	0.224074100898975	0.298544459665387
ITGB2	1.31495445400357	25.0396464285714	62.2972571428571	7.34327198624244e-07	5.69877759607073e-06
PPHLN1	0.207453107369643	9.090275	10.4960678571429	0.000167231680593386	0.00063379728803686
ETS1	1.33328510067603	9.22300357142857	23.2397357142857	1.84614485498944e-08	2.49807951190163e-07
SCML4	-0.0823946521641714	4.13486785714286	3.90533571428571	0.00634877124413062	0.0149437265976572
DDX53	-0.0642285194182006	2.38071428571429	2.27705	0.0178875054080224	0.0361456389716393
ENTPD4	0.0626218986522316	3.45485357142857	3.60811785714286	0.261617976025881	0.33779519090303
PIGQ	-0.0782489952231815	37.4689535714286	35.4908392857143	0.106888569141769	0.162833486088919
DNAJC11	0.205294923398225	26.3754428571429	30.4088285714286	0.000451767466284812	0.00151229909664433
LINC00663	-0.361153771972277	16.3150357142857	12.7019357142857	0.000223986324229885	0.000821102127087659
C11orf58	0.0054319909035061	2.40192857142857	2.41098928571429	0.844105026102714	0.864656082643356
NSAP11	-0.0709513842729637	4.39927857142857	4.18815714285714	0.00382400499574788	0.00970701903862449
BAGE	-0.0335216576397581	2.60693571428571	2.54706071428571	0.0930140810014942	0.145340968925541
ABCB5	0.0156886500154485	21.3210035714286	21.554125	0.622992566316917	0.67161080337043
TTL	-0.199673196263605	49.0272892857143	42.6904035714286	2.95198793568081e-05	0.000138031199034054
GRIK2	-0.000927845414814721	2.19420714285714	2.19279642857143	0.761762697969721	0.793681938208304
OR4D2	-0.110843525173015	18.1176964285714	16.7778285714286	0.0998539923790228	0.153688002961255
FAM159A	0.0294762242716597	5.86751071428571	5.988625	0.608396633829791	0.658391182334827
ADAMTS4	-0.0486473942137469	30.2129357142857	29.2111464285714	0.236858748312585	0.311537706062103
POF1B	-0.0133262205525371	2.65337142857143	2.628975	0.421984842537534	0.491396119458787
LARP4	0.225719632702245	22.892475	26.7695535714286	0.072580343196597	0.118264382743269
B4GALNT1	-0.000530533257870225	16.5229678571429	16.5168928571429	0.678383919143819	0.720678624609239
SNX25	0.0990113269197224	18.3467535714286	19.6500928571429	0.110547711354912	0.167395622166858
NOP9	0.329245926232642	20.9614464285714	26.33505	1.57445411260484e-05	8.0038847910296e-05
CARF	-0.0912532155693822	3.900875	3.66177857142857	0.0617392992721038	0.10353244099675
BD495725	0.410347477385378	31.59225	41.9862857142857	0.000933863225311252	0.00283630129696642
PIGK	-0.0603556330952446	2.72501071428571	2.61336071428571	0.0931877147545561	0.145340968925541
CXorf67	0.543658082007835	11.5733642857143	16.870075	0.08531482535457	0.135356297247077
MYO1D	0.0724632652150803	3.32941785714286	3.50091785714286	0.0186953036450909	0.037560210754793
LOC645261	0.0380003836138807	3.26207857142857	3.34914285714286	0.149283643181531	0.214654826786978
SOHLH2	0.0387988117003686	7.06144642857143	7.25392857142857	0.634625592994112	0.681824623034541
CDH19	-0.0283776338428283	3.11950357142857	3.05874285714286	0.371788380813606	0.445504666502364
FGD3	0.10454256943797	5.73859285714286	6.16986785714286	0.15748225616062	0.223842903292847
BAGE2	-0.202684942986708	7.60368214285714	6.60708214285714	0.000240708133762785	0.00087227846486675
CCNL1	0.852437907572922	94.996575	171.521010714286	1.86679577895077e-06	1.26260783221269e-05
ALOX15B	-0.208320970554901	16.7442428571429	14.4928785714286	6.37568060986311e-05	0.000270723372284376
TAS1R1	-0.11573312340911	7.82286071428571	7.21982142857143	0.0105663926197968	0.0231491512083444
ASAH1	-0.163237260183535	104.686725	93.4872321428571	0.0359595094417378	0.0654464308836857
KLF7	0.98248977011614	20.4917821428571	40.4891464285714	8.16723681224461e-07	6.22409912342574e-06
AP1S3	-0.0617119516301228	2.83899285714286	2.72011428571429	0.0652486328430211	0.108090553178619
OTUD5	0.307696524729056	24.2825392857143	30.055225	5.31515820707379e-07	4.30316347116689e-06
SYNCRIP	0.467101759646381	52.1723035714286	72.119325	0.000240708133762785	0.00087227846486675
TSTD2	0.0734727559972581	3.98741428571429	4.19574285714286	0.533474787941053	0.592522669108665
SLC39A14	-0.0761812569435871	3.17961071428571	3.01606785714286	0.143416830688969	0.207516093796708
AFF4	-0.0141399294729418	3.30038928571429	3.2682	0.597046099904736	0.648428954751305
EARS2	-0.0130361397786984	10.2700892857143	10.1777071428571	0.934697932204126	0.944336293466173
GTF3C3	0.858917577873657	6.37382142857143	11.5600535714286	8.82754493864443e-10	2.09907116333182e-08
UBA6	0.167947352396192	7.96627142857143	8.94977857142857	0.332262106334436	0.407396463288277
PPP1R12B	-0.0514400039752028	2.45461428571429	2.36863571428571	0.14698604088471	0.212303138359481
CA8	-0.0537650384548467	5.18162142857143	4.99207142857143	0.449062510297533	0.516326736141839
TRAPPC10	0.307377344192204	38.7867785714286	47.9969357142857	0.000155285500411	0.000593732076819872
GPR114	-0.000548754876690261	17.5615285714286	17.55485	0.993515649184508	0.994549533309293
AP5M1	0.217292805711912	4.94061071428571	5.74370714285714	0.126164214861332	0.186949536417194
NAA16	-0.0801502749327723	14.6305214285714	13.839875	0.300614635597008	0.376243866174196
BRINP1	-0.0368110652826947	3.89171428571429	3.79367142857143	0.376208205103391	0.448596700732649
SLC39A6	0.565556833949837	16.9145535714286	25.0328392857143	7.34327198624244e-07	5.69877759607073e-06
TXNL4A	-0.0992077421264579	38.85715	36.2749178571429	0.167414490920988	0.235305364372775
IFIH1	0.239424116510922	6.08093928571429	7.17867857142857	0.0579905315732151	0.0980234520514338
MCOLN2	-0.00803027858166949	9.567	9.51389642857143	0.738902438193975	0.773094986873936
CELF1	0.0443257049475392	22.3889785714286	23.0875392857143	0.380643727386553	0.453630093630005
NRP2	0.0285841237197975	15.3383107142857	15.6452392857143	0.678383919143819	0.720678624609239
CLASP2	-0.0937877634902122	18.72885	17.5500428571429	0.0699619321827051	0.11463335171745
FMN2	0.00177837382716439	2.93026071428571	2.933875	0.895696845370836	0.910761055324714
SORBS2	-0.0592274714925796	6.13806428571429	5.89117857142857	0.0740675480067425	0.120335599452379
IREB2	0.499067065228045	5.32754642857143	7.52941785714286	0.114303394165651	0.172122010155662
C17orf82	-0.103856584755358	58.4832642857143	54.4211428571429	0.152683954875419	0.218431050971979
FAM153A	-0.182951034217833	5.92733571428571	5.22138571428571	0.000393894343367539	0.00134386361255638
PRR5L	0.839320796931851	16.9010571428571	30.2395	1.50692459685244e-12	2.36229964764357e-10
ACTR3B	0.263887149400194	33.120825	39.7684892857143	0.000155285500411	0.000593732076819872
PDZD3	-0.0553730646403858	19.1416428571429	18.420875	0.563577482016544	0.619069358035717
C19orf66	0.280616347581151	19.5971571428571	23.8049357142857	0.000995323568921603	0.00299502810878542
BEST3	-0.0326056604495566	3.13656071428571	3.06646785714286	0.301890183185641	0.377393936248905
CWC27	-0.0846703771448603	392.6455	370.264692857143	0.138945456702551	0.202263220539007
CYP4B1	-0.745066287244044	54.6371107142857	32.5987107142857	6.67523064715468e-05	0.000280962422803768
IFNLR1	-0.0309373981872865	40.5176642857143	39.6580464285714	0.531025678268812	0.590236156995949
SLC2A4RG	0.456640961438203	39.7590928571429	54.5631071428571	3.05708175954657e-07	2.68229773123068e-06
RSRC1	1.62626890820816	44.8884321428571	138.576682142857	8.12005652233144e-11	3.39614142652372e-09
NPSA	-0.101023334140877	2.97121785714286	2.77027857142857	0.0122366754329478	0.0261845057823533
TMCC2	-0.0344981740945332	15.361025	14.9980642857143	0.231595259027845	0.306347300881698
SLC25A41	-0.0144611374051729	12.9853178571429	12.8558071428571	0.643000625732351	0.688654971780048
ZNF215	0.0775816789784995	3.18507142857143	3.36103928571429	0.119523623699752	0.17890080262804
PIAS2	0.0636875060314195	2.41393928571429	2.52288928571429	0.283111310771738	0.359611348050074
GABRG3	0.00707239906384949	3.19987857142857	3.21560357142857	0.501657975910512	0.564120215088413
PTCH1	0.294174450174376	7.98840714285714	9.79525	0.0247658736887474	0.0477210402326287
DPY30	-0.0676650414590654	102.151071428571	97.4706178571429	0.574634438977333	0.628832340455934
FYCO1	-0.291238418803943	57.550725	47.0304678571429	1.9375578244107e-07	1.80796015158746e-06
SEPT6	0.598030410570954	16.7901928571429	25.4144535714286	0.0214210736006004	0.0421863186869073
COL9A1	-0.0483881087103613	3.08311071428571	2.98141785714286	0.236858748312585	0.311537706062103
RNH1	0.0399134249712492	15.7689821428571	16.2113357142857	0.293022308659156	0.368879371730041
QRFPR	0.199889267872285	3.70593214285714	4.25667142857143	0.00917264058426939	0.0204790160022041
ANTXR2	0.00477934169764538	8.42196071428571	8.44990714285714	0.93469681873936	0.944336293466173
SDS	0.197058347219198	13.1856714285714	15.1155071428571	5.69172070404728e-05	0.000245024176687861
TGFB3	-0.107344285087374	7.92934642857143	7.360775	0.0421533874619089	0.0751551928269906
AFAP1L1	0.171690469056054	12.7683178571429	14.3819464285714	0.0082227109763134	0.0186313953310193
CLCC1	0.193347677277858	16.4266107142857	18.7824142857143	0.072580343196597	0.118264382743269
POFUT2	0.140223177274523	17.651625	19.453425	0.000828862313942322	0.00255926658155258
ZACN	-0.118139245839906	20.3679964285714	18.7665678571429	0.0516493812206826	0.0889386374917255
SERPINB5	0.0945886381751648	3.42332857142857	3.65529642857143	0.285557682443612	0.36124438003193
SLC22A7	-0.0728174982689858	17.4651642857143	16.6055178571429	0.23480738195755	0.310247151424588
BPIFA4P	-0.12239498152159	10.1010214285714	9.27941785714286	0.121482075436149	0.181613814810343
BBS9	0.103309865041922	3.68664285714286	3.96032142857143	0.0477476093332648	0.0832152397529344
TNK2	0.0553605034026283	4.43676785714286	4.61032857142857	0.171188618396195	0.240273821527495
USP25	-0.00759732489459353	2.24326785714286	2.23148571428571	0.788511973651229	0.815764513999851
ZCCHC7	0.189150662153477	9.98	11.3781214285714	0.417272444368857	0.487939923758323
TAPBP	0.228827157632041	25.3389964285714	29.6943107142857	0.00636317378364634	0.0149626496425897
LMOD3	-0.0838833579330629	4.94691071428571	4.66748214285714	0.0492461702505493	0.0856717386775483
GUSBP2	0.147546838648041	4.81934285714286	5.33831071428571	0.114303394165651	0.172122010155662
IMMP2L	-0.00966951011927208	3.90505714285714	3.87897142857143	0.960790708659313	0.966315643349351
KDELR1	0.115315690676677	577.061396428571	625.079857142857	0.00956681342523425	0.0212158097577525
PTPRM	-0.175803146212317	130.452217857143	115.486028571429	0.0809115035082159	0.12923747472903
TP63	0.0628535077031751	3.619575	3.78075357142857	0.0492422920040771	0.0856717386775483
PDZRN3	-0.114097507919943	5.68954285714286	5.25691071428571	0.00124544726512412	0.00365922538828568
GATA1	0.0340911936681509	18.9762785714286	19.4300321428571	0.357337187090213	0.431319619596771
PIF1	0.0404370224805901	4.56509642857143	4.69486071428571	0.161184589358532	0.228798005539916
MBNL1	0.097046970797658	6.86677857142857	7.34458214285714	0.0699619321827051	0.11463335171745
SCRN3	-0.118126545632456	5.33761071428571	4.91798571428571	0.00547592011436995	0.0131644777212781
APOL4	0.117056034374616	8.97801785714286	9.73683571428571	0.0440926207307084	0.0778063981092289
GDPD1	-0.192875610252365	10.3714	9.073525	3.50624241470151e-05	0.000160611706108935
CAPRIN2	-0.178484780545807	21.0163178571429	18.5706607142857	0.000720992938356498	0.00226418957626333
ZMAT3	-0.106311630396582	8.74296071428571	8.12186071428571	0.0163631730223055	0.0335556037471949
AGK	0.231139749374099	2.65831785714286	3.12023214285714	0.000376537427689456	0.00129361389321298
MBD1	-0.0382874626045577	7.19787142857143	7.00936071428571	0.468865488808984	0.534565259113486
ZAP70	0.234154990531302	14.9626892857143	17.5993785714286	0.0195703142437525	0.0390612619391242
SUGT1P1	-0.122626773663876	20.7345678571429	19.0449857142857	0.0116154666336266	0.0251351808988742
AC010524.4	-0.17762234876067	13.6204178571429	12.0426142857143	0.0134738698417713	0.0284209615729499
SAE1	0.219682958006069	14.0659357142857	16.3794678571429	0.00669007800419259	0.0155910275082841
NARR	0.658471184951976	108.762125	171.671128571429	8.45779569035887e-08	8.84349457485498e-07
PIK3IP1	-0.0806782133033419	12.1397857142857	11.4795392857143	0.0562492874416693	0.0955686954181156
LILRA5	-0.0459239489129502	9.47323571428571	9.17643214285714	0.194256463521363	0.266070127338205
SAMSN1	0.898530901838669	31.489025	58.7007928571429	1.53525961408774e-07	1.47483882037852e-06
RBM14	0.0759598200806746	5.04757142857143	5.32045357142857	0.134580461474354	0.197061254146665
DAOA	-0.100035036008802	3.166	2.95391071428571	0.00247896791815934	0.00665850971595458
Dbpht2	0.000478673888992143	2.75514642857143	2.75606071428571	0.889220593145177	0.905294858576127
KLHL17	-0.15906959245379	25.2761857142857	22.6374142857143	0.0699619321827051	0.11463335171745
OR10A5	-0.0331573784922372	6.73311785714286	6.58013571428571	0.608396633829791	0.658391182334827
OR10A4	-0.048044776352846	8.86835714285714	8.57788571428571	0.332262106334436	0.407396463288277
TREML1	-0.0125516394772145	14.9772964285714	14.8475571428571	0.676041061353374	0.719707076886234
OR8D1	-0.210923827105522	14.9311	12.9002285714286	0.000186775363901421	0.000700341429171824
PTPRS	-0.0312168353484972	6.601125	6.459825	0.43933887306239	0.507268731006567
KRTAP2-3	-0.153573876057392	6.80902857142857	6.12145714285714	0.176395390454143	0.246260020329905
BLID	0.0948127816323638	4.95217857142857	5.28856428571429	0.184383258642258	0.254766705188002
GSX1	-0.0732796798319533	5.06163928571429	4.81096071428571	0.176380607597996	0.246260020329905
SMC1A	0.230337097887542	3.96242857142857	4.64836071428571	0.0087431102548216	0.0196652611672643
RTN4IP1	0.148869434260436	11.4586357142857	12.7041928571429	0.43933887306239	0.507268731006567
SMOX	-0.0524695440821397	17.0692214285714	16.4595821428571	0.228414466150285	0.303601014140088
OTUB2	-0.0214666623125233	22.3725071428571	22.0420785714286	0.224074100898975	0.298544459665387
H6PD	-0.0247316003719442	7.29266071428571	7.16871071428571	0.489134496939558	0.552849463722061
SLA2	0.0644542714005274	20.0143714285714	20.9288142857143	0.241325977958848	0.316861997241786
KLRC4-KLRK1	0.138541773527359	23.0946821428571	25.4224392857143	0.0338266714894381	0.0622878142113442
KCNIP3	0.00843299688876797	40.7869964285714	41.0261071428571	0.702372592230599	0.741288209125083
KLK4	-0.177761946143141	88.5327107142857	78.2694142857143	0.000125776139964516	0.000492378921581401
CMTM3	-0.0983103564482315	7.07404285714286	6.60805	0.101273291996502	0.155702628298
TNAP	-0.146317971750252	19.7264928571429	17.8239428571429	0.00533941437263258	0.0129362365618802
PNKD	-0.0919336991449358	23.5326964285714	22.0798892857143	0.0213131826730186	0.0421863186869073
CXADR	0.193097672490332	5.61016785714286	6.41363214285714	0.358787145562328	0.432674930852786
SCAMPER	-0.158392709808836	5.32297142857143	4.76950357142857	0.000258570845708071	0.000929212906727782
TAGLN	-0.457208073138224	717.133953571429	522.356425	0.00704748076621936	0.0162983100705388
RGS5	-0.379807584074991	37.0178107142857	28.4496714285714	0.177802061220675	0.247164018760716
GAFA3	-0.0899183243680535	2.87627857142857	2.70248214285714	0.0116154666336266	0.0251351808988742
MS4A4A	0.952939767795559	71.8056321428571	139.002292857143	0.000933863225311252	0.00283630129696642
CD209	0.020827742172119	5.47500714285714	5.55462142857143	0.563577482016544	0.619069358035717
CFL1	0.757149160241329	106.502092857143	180.004246428571	0.000258570845708071	0.000929212906727782
AGTRAP	0.663161411431187	39.2653107142857	62.1785392857143	3.06520747559969e-06	1.93523227345215e-05
CMTM1	-0.162312878028166	9.29663928571428	8.30739642857143	0.0413307869767211	0.0737320614337308
ERVH-6	0.636321652014728	37.3956714285714	58.126375	0.00136134293503319	0.00393204593068205
CD79B	-0.0490294217069178	10.0064	9.67205	0.566272939993652	0.621546300974309
GEMIN7	0.308820464991347	42.4357214285714	52.5648964285714	0.000591471286115851	0.00190725382112902
STH	-0.169640159846677	19.7489107142857	17.5580535714286	0.00051732540425424	0.00169949666722019
ATN1	-0.0590179719320458	71.9218428571429	69.0390214285714	0.350269985537049	0.424483977777047
C7orf34	-0.0660173283290042	3.98706785714286	3.80873214285714	0.0689065043858963	0.113384831237525
CDKN3	1.77462163150368	80.9460535714286	276.955517857143	2.35775780997169e-10	7.43624866355155e-09
RBM15	0.673970074438358	50.3957678571429	80.4043	1.14508488539584e-11	7.9194220358275e-10
MKL1	0.0211016508293413	12.0154214285714	12.1924571428571	0.755530573341063	0.787688729672246
TIMM10	0.431401986566492	317.32395	427.925128571429	0.00144774913731862	0.00415552895606591
GNG4	-0.14729916144737	26.8036857142857	24.2021	0.0699619321827051	0.11463335171745
GNG2	0.122194165093451	4.06305	4.42217857142857	0.0299090193011174	0.056103933298134
CDC25A	0.518900820600209	3.15272857142857	4.51742857142857	1.24128779990866e-06	8.90487244388711e-06
BPIFC	0.395108067083313	15.632	20.556725	0.194256463521363	0.266070127338205
ZAR1	-0.0265256836458116	3.28693928571429	3.22705714285714	0.509858600044535	0.571208975793674
POSTN	0.322517390329158	4.28342142857143	5.35646428571429	0.000133719111191178	0.000519724067977759
CD79A	0.1489129646017	40.9519964285714	45.4048607142857	0.162392035135763	0.229603329741993
RHEB	0.448115736223015	97.6320535714286	133.195239285714	0.00247896791815934	0.00665850971595458
PQLC2	0.493295534153716	22.4909392857143	31.6595214285714	7.34327198624244e-07	5.69877759607073e-06
IRAK1	-0.0498205637240585	14.89775	14.3920678571429	0.566272939993652	0.621546300974309
XRN1	0.525757299010215	18.0316857142857	25.9600214285714	0.000208339073753038	0.000769472917597826
LINC00520	1.22585430734514	27.8044142857143	65.0328321428571	5.25204216902252e-05	0.000228513504159177
C11orf63	-0.0460391465675052	9.33346785714286	9.04032142857143	0.250141887746753	0.325209041060605
TRIB3	-0.0435639887468255	9.60812857142857	9.32233571428571	0.324158563692514	0.399567108359524
PHF23	-0.0592777184765758	56.6514321428571	54.3709	0.308334770195861	0.383795361819492
TMEM192	0.0463749385858927	165.133407142857	170.5278	0.915856574833367	0.927470221705357
CCDC116	-0.231776793993297	15.4315107142857	13.14125	0.000277644404181922	0.000988025647503281
ZFP82	-0.267035040995688	15.7642928571429	13.1005321428571	0.00247896791815934	0.00665850971595458
ARPC5	0.499894194420395	68.7288392857143	97.1901285714286	0.000421923400113368	0.00142661206528187
FCRL5	-0.104100893619266	12.2379	11.3859535714286	0.0374188968481714	0.0677248010999958
ZNF385B	-0.520452234023794	5.51534285714286	3.84503928571429	1.13616586861757e-05	5.98722068664184e-05
C11orf57	-0.421771437965158	46.2688857142857	34.5400678571429	7.20713343673745e-06	4.05111726219587e-05
MAP3K19	0.198776758630268	4.02468928571429	4.61923571428571	0.000192952262691396	0.000721207985242536
MOG	-0.0996426371299219	11.70585	10.92465	0.0780535875201098	0.12550716526841
EXD2	-0.281950107338977	8.34558928571429	6.86406785714286	2.66724974362551e-06	1.72779327592123e-05
CRISPLD2	-0.0767181838427522	32.3847464285714	30.7076107142857	0.254734781363816	0.330743803200927
ARHGDIB	-0.1461706544185	40.2235535714286	36.3478464285714	0.0186975769173437	0.037560210754793
RHOA	-0.250891274965294	59.2173964285714	49.7649428571429	0.0170520460113386	0.0347326708121231
L3MBTL2	0.132302366621817	12.4883571428571	13.6877571428571	0.126164214861332	0.186949536417194
THSD4	-0.381846829406151	3.35146428571429	2.57209642857143	2.36249225975803e-06	1.55175120090811e-05
SAMD14	-0.0307409671882528	18.6431642857143	18.2501178571429	0.80583181424561	0.831042282777635
MKS1	0.0201485975240145	13.5651035714286	13.7558821428571	0.81218110123127	0.837182243697695
AKT1S1	0.192627159056983	5.786875	6.61348928571429	0.00486272930062306	0.0118943527726636
FAM138A	-0.16425929048512	12.6455607142857	11.2847285714286	3.78972315644695e-05	0.000171885793313088
PACS2	-0.122789786810753	256.148996428571	235.249792857143	0.00278297036230825	0.00735513908070601
BIRC5	0.713230809295843	24.0285035714286	39.3940464285714	5.98417906346603e-06	3.45170840883433e-05
ESYT2	-0.0717028191497129	2.73931785714286	2.6065	0.014952452741724	0.0310635168401105
LRRC41	0.121836262908364	22.308525	24.2743285714286	0.243437706970906	0.318213229933619
KLF6	-0.14753242096309	1076.6361	971.979832142857	0.20581993495825	0.278858340814433
IRGQ	0.185165055208217	58.3865428571429	66.3824071428571	0.0060229439122623	0.0142720369516523
UCHL1	0.245203274812354	10.5906892857143	12.5527178571429	0.000482089074226451	0.00160391468840976
POLR2B	0.0604796704676502	4.87125	5.0798	0.189868084150703	0.261141110345183
C3orf79	-0.0531612688738288	3.22858571428571	3.11178214285714	0.156333888904679	0.223270387164248
CYTH2	0.221662862287195	28.9008428571429	33.7006035714286	0.0606106621416666	0.101745335361632
HNRNPM	0.117093939947432	29.4197964285714	31.9071821428571	0.0625610840991628	0.104390146084569
LOC284454	1.12752035097146	112.396996428571	245.568214285714	6.59786292505841e-07	5.17917555945887e-06
RBM18	-0.25440452066795	25.3418321428571	21.2448964285714	0.000167231680593386	0.00063379728803686
SEPW1	0.171810276485898	1101.74955714286	1241.08901428571	0.0234195814702408	0.0454955574311278
PSMB8-AS1	0.481847129307637	80.0257571428571	111.758414285714	0.00412753986584361	0.0103264128361329
MICALL2	0.396940566122888	4.76988214285714	6.28056428571429	4.29468428731317e-06	2.61023559943735e-05
PDHA1	0.189453885206533	228.361685714286	260.408132142857	0.0838523369379733	0.133175760346591
TOLLIP-AS1	-0.149903382022895	11.0914607142857	9.99685357142857	0.0344938782855747	0.0632408446859412
HEXDC	0.198910603669458	61.1795392857143	70.2237892857143	0.0108281343939431	0.0236731206796506
LOC100507477	-0.106213794325519	9.29933928571429	8.6393	0.271010783922649	0.346780411158777
RNF207	0.246776833102371	70.8260285714286	84.0388535714286	0.250141887746753	0.325209041060605
RPS24	0.135187826349221	72.3705214285714	79.4798964285714	0.348851682195935	0.423177126579879
ERVFRD-1	-0.324504343314426	9.246725	7.38418214285714	2.95198793568081e-05	0.000138031199034054
LZTS2	0.158158744135931	65.9368535714286	73.5764357142857	0.00330180625101546	0.0085350098558984
PSMD6	-0.0335138765843961	3.95041785714286	3.85970714285714	0.541771224709468	0.599974067426817
PDSS2	-0.170699272515098	42.2823428571429	37.5641392857143	0.147995900098742	0.213020283873337
KB-431C1.4	-0.275508461507668	24.4801214285714	20.224475	0.0224012957552684	0.0438433942540225
LOC101928605	-0.131776148617981	16.8521714285714	15.3810964285714	0.410892410318653	0.481437054566142
BC038731	-0.0275092681584042	10.4811392857143	10.2831785714286	0.714479022269836	0.751965364446814
MTSS1L	0.137367201866826	40.2344964285714	44.2537642857143	0.324158563692514	0.399567108359524
DNM2	0.380380254131339	25.7957535714286	33.5779428571429	7.90271422143687e-06	4.38388312105553e-05
ADAM15	-0.0874336126494564	160.117710714286	150.702075	0.499440391506074	0.562006540407457
DCTN5	-0.23816013526822	33.8523571428571	28.7009035714286	0.00127963027035934	0.00373271060118742
ARMCX5	-0.00172656955648698	29.9437785714286	29.9079642857143	0.122110209627572	0.181923151450074
FRY	-0.197255624920717	7.41459642857143	6.46707142857143	0.0029471622790404	0.00773159728664088
TCAIM	-0.705767179060169	26.8596821428571	16.4681107142857	4.65713906262389e-05	0.00020649284303857
AGAP2-AS1	0.468712261027486	19.8192428571429	27.4273285714286	1.68736782093354e-06	1.1590316518798e-05
FAM120A	-0.0912213149456087	14.8309928571429	13.9222642857143	0.224074100898975	0.298544459665387
PTCD2	-0.206433064564269	56.627	49.0773392857143	0.0579905315732151	0.0980234520514338
ST7-AS1	-0.177458960355445	14.1371785714286	12.5009285714286	0.00247896791815934	0.00665850971595458
GON4L	0.519662272647683	48.3513571428571	69.3174535714286	0.000319722690398389	0.00111747172533462
EXD3	-0.0789408057446357	5.21144285714286	4.93394642857143	0.0477476093332648	0.0832152397529344
RPUSD3	0.180977408255643	91.7909071428572	104.058914285714	0.000591471286115851	0.00190725382112902
CBX3	0.689030410910438	91.1525821428571	146.956160714286	4.26960464275457e-07	3.55319083974105e-06
CASC10	-0.117020173325259	77.9202142857143	71.8494678571429	0.106888569141769	0.162833486088919
TSGA10	-0.134498119516109	11.7917357142857	10.7421142857143	0.00939438919307816	0.0209564096651326
KIAA2013	-0.142337629586327	21.1746464285714	19.1852857142857	0.0105764373214328	0.0231491512083444
HUNK	0.340102393346998	17.5783142857143	22.2514464285714	0.0128423284515789	0.0272846297581331
VIM	0.266831267320664	5.2961	6.37206785714286	0.147995900098742	0.213020283873337
LOC101928001	0.0177241709710647	2.326975	2.35573928571429	0.605694121751735	0.657240885508822
MIR205	0.175811090779331	108.509107142857	122.571810714286	0.0838523369379733	0.133175760346591
LOC101928717	0.251823882529591	18.1803607142857	21.6475642857143	0.000167231680593386	0.00063379728803686
CRTAC1	-0.233818937920728	17.8018928571429	15.1383892857143	0.000393894343367539	0.00134386361255638
HINT1	0.23808760307256	61.1946107142857	72.17465	0.0366755480449638	0.0666865386438327
FBXO28	0.458764260830613	32.6942785714286	44.9338428571429	1.03369143984121e-09	2.37782738493038e-08
MYL12A	-0.197066523184415	32.8999357142857	28.6993535714286	0.250141887746753	0.325209041060605
LOC100130417	-0.208597219276278	10.6099928571429	9.18165714285714	0.0227379345736014	0.0444324016049055
ASB16-AS1	0.0850852018057755	8.23063571428571	8.73065	0.172550789422498	0.241338467817614
C17orf64	-0.167614240182839	7.17914642857143	6.39169285714286	0.00774584144641713	0.0177875026943845
LINC00661	-0.066862505491966	4.51893571428571	4.31428214285714	0.0244770832040105	0.0472032542232982
DAAM1	-0.400696952159355	91.9991392857143	69.6886357142857	0.00330180625101546	0.0085350098558984
C22orf42	-0.0614098324292378	9.04503214285714	8.6681	0.211782622738552	0.285329491024699
CACNA1D	-0.538585781320122	17.2341285714286	11.8647571428571	1.41307140844806e-08	2.01379328060514e-07
DIAPH3-AS1	-0.110201112716577	32.2424678571429	29.8713214285714	0.0224012957552684	0.0438433942540225
EIF4A2	0.326788806297045	6.04679285714286	7.584	0.0440926207307084	0.0778063981092289
IGFBP5	-0.248432632279326	32.1870464285714	27.0953928571429	0.00163559624014079	0.00463003253479127
ATP5H	-0.0359561390066565	33.5959607142857	32.769	0.162392035135763	0.229603329741993
BTBD7	-0.340330240381986	136.215628571429	107.591342857143	0.000277644404181922	0.000988025647503281
LOC284939	-0.191181610627691	82.1383428571429	71.9439928571429	0.000208339073753038	0.000769472917597826
LOC101928817	0.367226139233859	18.0810964285714	23.3222714285714	0.0536964789418428	0.091917704751777
CSNK1A1	0.219831987913961	45.0371857142857	52.4502142857143	0.0255749741880533	0.0490034566538499
PEX13	0.212210402634462	23.8267964285714	27.6024321428571	0.236858748312585	0.311537706062103
MESP2	-0.0250345154331502	25.7672285714286	25.3239571428571	0.468865488808984	0.534565259113486
NBEAL2	-0.0542255106400593	13.6444357142857	13.1411107142857	0.465862965749966	0.532547828237808
GPR180	-0.0290256315755437	4.97109642857143	4.87208214285714	0.279444404828181	0.355326593895493
EME2	-0.095684982236163	25.4577928571429	23.8241107142857	0.0899889089469014	0.141194786480077
LINC00893	-0.202931149757724	4.92199642857143	4.27615	0.0029471622790404	0.00773159728664088
MTMR11	-0.030248828343499	33.5373535714286	32.8415	0.420252829793535	0.489936133802709
ZNF207	0.0382343761888322	72.7840571428571	74.7387714285714	0.563577482016544	0.619069358035717
HHIP	0.132474706126305	4.977	5.45565	0.0579905315732151	0.0980234520514338
GPR173	-0.0720633239485058	10.4192214285714	9.91156071428571	0.230404426179144	0.305096287775574
LINC01089	-0.0908202357563672	59.7660178571429	56.1196178571429	0.0100557439773839	0.0221584454178858
TTN-AS1	-0.0365340115697554	28.8409428571429	28.1197607142857	0.585791328686825	0.638861215614495
LINC00599	-0.053616472158553	25.2639285714286	24.34225	0.263927981321902	0.339544551289691
MAGEE1	-0.0849902108175318	35.6596821428571	33.619625	0.072580343196597	0.118264382743269
LOC100507564	0.0837942194801609	13.2492857142857	14.0416142857143	0.261642431095897	0.33779519090303
RTN4	0.478039914010226	76.6980642857143	106.8289	0.000720992938356498	0.00226418957626333
SIK2	-0.17533114894525	28.3768035714286	25.1294821428571	0.00124520707597796	0.00365922538828568
NEUROD1	-0.504396161331084	6.92545357142857	4.88213571428571	0.00561556813458928	0.0134910056115692
SPEN	0.097265969572006	7.66068928571429	8.19497857142857	0.0244770832040105	0.0472032542232982
ZNF451	0.493182248412588	121.613310714286	171.17635	1.61947647056981e-05	8.15829101325134e-05
RPP30	-0.222360500957749	16.7333464285714	14.3431857142857	0.0244770832040105	0.0472032542232982
LOC284926	0.721465337218699	17.7068035714286	29.1959678571429	0.000720992938356498	0.00226418957626333
KDM6B	0.328976916379232	23.8298142857143	29.9331607142857	0.00051732540425424	0.00169949666722019
LINC00528	0.2834742813864	8.45216071428571	10.2873142857143	0.00173753919550187	0.00487750921798728
RP11-16P6.1	-0.142090624423063	3.79071428571429	3.43516428571429	0.0413307869767211	0.0737320614337308
C4orf27	0.0110596495750399	3.52667857142857	3.55381785714286	0.533446808907603	0.592522669108665
RPAIN	-0.0082697858897971	17.099275	17.0015392857143	0.643000625732351	0.688654971780048
HEMK1	-0.0658877035356964	12.6546035714286	12.0896678571429	0.138058593115921	0.201773116365091
UNC13C	0.0214954459971519	2.44795714285714	2.48470357142857	0.980388426733929	0.983476337471596
HOMER2	-0.503086582549414	9.83908928571429	6.94241785714286	0.000223986324229885	0.000821102127087659
LINC00290	0.00425905487765332	3.19633214285714	3.20578214285714	0.812177951511216	0.837182243697695
LOC389906	0.231211705991583	44.8417035714286	52.6361071428571	0.0234195814702408	0.0454955574311278
RP11-480A16.1	0.458793539889183	55.6460785714286	76.479525	3.72178023009191e-06	2.28832176087842e-05
DKFZp451A211	0.174374957053165	11.1430178571429	12.5746214285714	0.00173753919550187	0.00487750921798728
TNPO1	-0.0938191088891323	12.5053464285714	11.7179964285714	0.236858748312585	0.311537706062103
LINC01260	0.0773913340888397	8.30660357142857	8.76436785714286	0.309628755090449	0.384998433841314
NAP1L1	-0.27478602711386	29.8122178571429	24.6419714285714	0.00742161470814237	0.0170628606266613
RAB11B-AS1	-0.317476786754707	7.40884642857143	5.94539285714286	1.8254908143137e-05	9.11582399795206e-05
RASGRF2	-0.14924541330777	43.2169714285714	38.9696928571429	0.0204071189902295	0.0406196764287503
LOC642533	-0.286631545729587	35.4608285714286	29.0712821428571	4.11480597869535e-05	0.000185083185817491
TEX36-AS1	-0.0983704802585719	2.94291428571429	2.74893928571429	0.0127440792607977	0.02721797854438
MYLK4	-0.345543104982816	13.1581642857143	10.3556285714286	0.00059671920605048	0.00192241871786365
LOC100131170	-0.238075637575498	11.1250285714286	9.43263928571429	6.16532295254715e-05	0.000262054086452612
RP11-16N11.2	-0.0881612850527338	3.51418928571429	3.30587142857143	0.0536964789418428	0.091917704751777
ARVCF	0.0511633604795172	33.0555285714286	34.2488357142857	0.341882199102675	0.41636951024975
ITFG1	0.357960582013733	210.051807142857	269.205107142857	7.20713343673745e-06	4.05111726219587e-05
SNAI3-AS1	0.0358830518810049	7.20082142857143	7.38216785714286	0.751213816531547	0.783844689836167
GPR37L1	-0.23379622904519	16.7753785714286	14.2656857142857	8.39007679482244e-05	0.000346452344654303
ESRRB	-0.088420836991669	4.52103571428571	4.25226785714286	0.0122366754329478	0.0261845057823533
FAM154B	-0.0323152817024221	3.15910714285714	3.08913214285714	0.0701706547037506	0.114858698877221
LOC100505727	-0.124900922103602	13.7965535714286	12.6523642857143	0.00571199762513604	0.0136436801061799
LINC00847	0.424133331887913	24.9962321428571	33.5391	0.00195879736117845	0.00541034045348728
ANKRD65	0.0251225477957249	45.8233857142857	46.628325	0.902970204994289	0.916437677359205
ANKRD36BP2	0.648939264478267	47.1707071428571	73.9643714285714	0.000853673546121177	0.00263203573085118
CTB-167B5.2	-0.753365630151079	21.3809785714286	12.6835821428571	2.71345651143695e-05	0.000128467293403893
EMC1	0.267091686197038	40.1120107142857	48.2699714285714	0.00311997776734981	0.00811255553390147
LOC100507516	0.831677161690497	7.59568214285714	13.5184392857143	0.184390758558079	0.254766705188002
HSPA4L	-0.311491370751519	91.2698607142857	73.5460142857143	0.147995900098742	0.213020283873337
RP4-798A10.7	0.311896190021594	17.9146964285714	22.2381964285714	0.00127963027035934	0.00373271060118742
RGS9BP	-0.26739805379569	6.57456428571429	5.46225714285714	1.76721003417973e-05	8.83312847268437e-05
C10orf90	-0.0653025849212523	4.472925	4.274975	0.0244770832040105	0.0472032542232982
RNASET2	-0.0773034094496476	4.20323571428571	3.98394285714286	0.0344938782855747	0.0632408446859412
SRGAP2	0.146601715649047	13.9630678571429	15.4565428571429	0.064953837068366	0.107678055293579
ZNF814	-0.157263615036091	5.60500357142857	5.02614285714286	0.138945456702551	0.202263220539007
CLEC2B	-0.246787655968643	18.9963428571429	16.0095642857143	0.0606106621416666	0.101745335361632
RP11-757F18.5	0.562947375098107	4.487825	6.62979285714286	0.00571199762513604	0.0136436801061799
SEPT7P9	-0.192127056246282	11.3582392857143	9.94202857142857	0.000353735706692189	0.0012250218885169
LOC155060	-0.221289115254215	13.7098821428571	11.7603178571429	7.90271422143687e-06	4.38388312105553e-05
VCPIP1	0.0710322496148592	11.8197892857143	12.4163107142857	0.31618275443615	0.391743787373821
RP11-235E17.4	-0.0360571517590218	10.2064892857143	9.95456071428571	0.290525680209579	0.366915018814544
URI1	-0.0754538356240908	6.411775	6.08505357142857	0.0754034737607382	0.121944346263068
LOC101927468	-0.139993910693327	5.87281071428571	5.32971071428571	0.0234195814702408	0.0454955574311278
ZNF391	-0.21231213910013	14.1713571428571	12.2320464285714	0.0224012957552684	0.0438433942540225
AX748267	-0.026840566640181	7.77355	7.63026428571429	0.82491050433359	0.848408689059883
LOC100310756	0.473602695339885	26.4482785714286	36.7253571428571	3.05708175954657e-07	2.68229773123068e-06
LOC375196	-0.0913806706935594	6.12303571428571	5.74722857142857	0.212969226054467	0.286683196040649
LOC100506271	-0.00361372679900196	16.1389607142857	16.0985857142857	0.928764737883781	0.938879777780485
EIF1B-AS1	0.00689917242164384	28.9702071428571	29.1090785714286	0.631376180476578	0.678747033801982
LOC400756	-0.0841604840494923	12.5095535714286	11.8006785714286	0.194256463521363	0.266070127338205
AF086125	-0.0494038725262518	3.22096785714286	3.11253571428571	0.23480738195755	0.310247151424588
LOC645513	-0.110693153712409	3.387675	3.13747142857143	0.0232309001574493	0.0453622015161561
LOC101928818	-0.210212972536776	6.42252142857143	5.55168928571429	5.25204216902252e-05	0.000228513504159177
C20orf202	-0.0274539392945807	8.49710357142857	8.33693571428571	0.666506966112184	0.710307529652138
MYRFL	-0.13669526235276	7.44428571428571	6.771325	0.00865103871195174	0.0194747295246287
MYT1	0.00312726497696447	8.86271428571429	8.88194642857143	0.622992566316917	0.67161080337043
LOC101928896	0.128416576281262	15.7822428571429	17.2514642857143	0.00742161470814237	0.0170628606266613
RP11-480I12.10	-0.116111821318723	23.7241357142857	21.8895714285714	0.0082227109763134	0.0186313953310193
PAPD4	-0.0665680895645773	21.6522428571429	20.675875	0.941691369336166	0.949452808445035
FGFR1OP2	0.0714389382028746	2.56761428571429	2.69795714285714	0.0740675480067425	0.120335599452379
LOC100506016	-0.0473769500890915	3.77574285714286	3.65376428571429	0.417272444368857	0.487939923758323
POM121L12	0.0743682804557704	110.153671428571	115.980789285714	0.147995900098742	0.213020283873337
FXYD2	-0.112051123100437	6.44104285714286	5.95971428571429	0.0390476266885083	0.0701498237358999
C12orf76	-0.13127962510977	6.92899285714286	6.32631785714286	0.00106043517098229	0.00316798271082696
LOC100287015	0.487829860126916	7.534725	10.5662	2.10108531099457e-05	0.000102952693763783
LINC00899	0.0727282282031139	18.1678964285714	19.1072428571429	0.126164214861332	0.186949536417194
AF520793	-0.00312757306180345	8.64028571428571	8.621575	0.619840744462063	0.668519502346888
PRRT3	-0.592345802050273	53.5192214285714	35.49735	3.72178023009191e-06	2.28832176087842e-05
C1orf86	0.193652195312023	9.67238928571429	11.0618785714286	0.00263808360635204	0.00702437888289233
C2orf71	-0.174500673815193	13.45775	11.9245642857143	0.00909882895114321	0.020333528732106
RP11-389C8.2	-0.503942067778468	43.7520821428571	30.852975	0.00120238470487637	0.00354007616990799
LOC284889	-0.583425337430397	215.142035714286	143.580925	0.0359595094417378	0.0654464308836857
TRIM44	-0.146590657850646	15.0514821428571	13.59725	0.00174842267425428	0.00490480766904074
MESDC1	-0.029049326046545	22.3185464285714	21.8736464285714	0.980389431969563	0.983476337471596
FILIP1	-1.43285731220755	22.8004071428571	8.44519285714286	2.10691110951694e-08	2.78504433545953e-07
BC042382	-0.148794954861631	9.36739642857143	8.449425	0.0162771801031149	0.0334181182113136
LOC101928747	0.273232114985426	7.13726428571429	8.62547142857143	0.00956681342523425	0.0212158097577525
MAPK12	-0.0984196130575974	56.0797392857143	52.3815964285714	0.118157078619365	0.17696802935751
LOC150051	0.256269476748151	13.9306214285714	16.6385428571429	0.0579905315732151	0.0980234520514338
COTL1	0.437551654343379	14.1097642857143	19.1089107142857	9.0774386106162e-07	6.83407446874673e-06
HEATR1	0.126616489635365	3.11666785714286	3.40256071428571	0.230404426179144	0.305096287775574
EIF4A2	0.0385573402747257	3.03633214285714	3.118575	0.506888979574692	0.569518216729434
HCN1	-0.0940112127381423	2.72695357142857	2.55492142857143	0.00369413089215569	0.00940102117252175
RGL3	-0.12645797413726	2.92983928571429	2.68396071428571	0.00326639803927509	0.00847557401976198
ERICH1	-0.0452933257954307	21.6501535714286	20.9810071428571	0.256971821281798	0.332332843668216
C6orf89	0.0293445496840383	6.29160357142857	6.42088571428571	0.682042204236569	0.724128789858953
LOC101927531	-0.106950241038657	4.60409642857143	4.27512857142857	0.0139686829242152	0.0294060714936005
ADAMTS9-AS2	-1.16211689776899	46.6502642857143	20.8459678571429	3.19042013969151e-08	3.88933533503983e-07
PHKG2	-0.0721488594219162	5.27698571428571	5.019575	0.28679408273283	0.362472228518407
OLIG3	-0.0302172857124325	3.60068571428571	3.52605357142857	0.531025678268812	0.590236156995949
FAM185A	0.0742895351719763	128.383846428571	135.167960714286	0.738902438193975	0.773094986873936
[truncated: 19,164 more rows]
