# Supplementary material for: UBE2S and HIF1α expression patterns and stratified analysis reveal prognostic value in esophageal squamous cell carcinoma
Source: PeerJ journal article supplement (doi:10.7717/peerj.20694), 2026-01-28
Supplement: all_original_document.zip [file Table 1.xlsx]

## Sheet: Sheet1
		Table 1: Clinical characteristics of esophageal squamous cell carcinoma patients
			Number(%)	HIF1α				UBE2S
				Negative（%）	Positive（%）	P		Negative（%）	Positive（%）	P
		Age（years）				0.348				0.138
		≤60	91（35.1）	14（42.4）	77（34.1）			6（2.3）	85（32.8）
		＞60	168（64.9）	19（57.6）	149（65.9）			21（8.1）	147（56.8）
		Gender				0.040*				0.917
		Male	180（69.5）	28（84.8）	152（67.3）			19（7.3）	161（62.2）
		Female	79（30.5）	5（15.2）	74（32.7）			8（3.1）	71（27.4）
		Nationality				0.766				0.001*
		Han	135（52.1）	18（54.5）	117（51.8）			22（8.5）	113（43.6）
		Kazak	124（47.9）	15（45.5）	109（48.2）			5（1.9）	119（45.9）
		location				0.931				0.394
		Upper	13（5.0）	2（6.1）	11（4.9）			3（1.2）	10（3.9）
		Mid-esophageal	140（54.1）	17（51.5）	123（54.4）			14（5.4）	126（48.6）
		Lower	106（40.9）	14（42.4）	92（40.7）			10（3.9）	96（37.1）
		Tumor size				0.705				0.917
		＜3cm	79（30.5）	11（33.3）	68（30.1）			8（3.1）	71（27.4）
		≥3cm	180（69.5）	22（66.7）	158（69.9）			19（7.3）	161（62.2）
		Differentiation				0.457				0.241
		Well	64（24.7）	7（21.2）	57（25.2）			9（3.5）	55（21.2）
		Moderate	145（56.0）	17（51.5）	128（56.6）			11（4.2）	134（51.7）
		Poorly	50（19.3）	9（27.3）	41（18.1）			7（2.7）	43（16.6）
		Lymph metastasis				0.297				0.584
		Negative	170（65.6）	19（57.6）	151（66.8）			19（7.3）	151（58.3）
		Positive	89（34.4）	14（42.4）	75（33.2）			8（3.1）	81（31.1）
		Invasion depth				0.050*				0.58
		Mucosa	11（4.2）	4（12.1）	7（3.1）			2（0.8）	9（3.5）
		Muscularis	113（43.6）	12（36.4）	101（44.7）			13（5.0）	100（38.6）
		Full thickness	135（52.1）	17（51.5）	118（52.5）			12（4.6）	123（47.5）
		AJCC stage				0.214				0.616
		Ⅰ-Ⅱ	181（69.9）	20（60.6）	161（71.2）			20（7.7）	161（62.6）
		Ⅲ-Ⅳ	78（30.1）	13（39.4）	65（28.8）			7（2.7）	71（27.4）
		Vessel invasion				0.608				0.020*
		Negative	205（79.2）	25（75.8）	180（79.6）			26（10.0）	179（69.1）
		Positive	54（20.8）	8（24.2）	46（20.4）			1（0.4）	53（20.5）
		Nerve invasion				0.156				0.161
		Negative	203（78.4）	29（87.9）	174（77.0）			24（9.3）	179（69.1）
		Positive	56（21.6）	4（12.1）	52（23.0）			3（1.2）	53（20.5）
		Postoperative treatment				0.229				0.988
		No	86（33.2）	14（42.4）	72（31.9）			9（33.3）	77（33.2）
		Yes	173（66.8）	19（57.6）	154（68.1）			18（66.7）	155（66.8）
		UBE2S				0.013*
		Negative	27（10.4）	8（24.2）	19（8.4）
		Positive	232（89.6）	25（75.8）	207（91.6）
		Abbreviations: AJCC:American Joint Committee on Cancer；* p<0.050 were considered as significantly.
