# Supplementary material for: UBE2S and HIF1α expression patterns and stratified analysis reveal prognostic value in esophageal squamous cell carcinoma
Source: PeerJ journal article supplement (doi:10.7717/peerj.20694), 2026-01-28
Supplement: Table_S1.docx [file Table_S1.docx]

|  | **Number(%)** | **HIF1α** | | | **UBE2S** | | |
| --- | --- | --- | --- | --- | --- | --- | --- |
| **Negative（%）** | **Positive（%）** | **P** | **Negative（%）** | **Positive（%）** | **P** |
| **Age（years）** |  |  |  | 0.348 |  |  | 0.138 |
| ≤60 | 91（35.1） | 14（42.4） | 77（34.1） |  | 6（22.2） | 85（36.6） |  |
| ＞60 | 168（64.9） | 19（57.6） | 149（65.9） |  | 21（77.8） | 147（63.4） |  |
| **location** |  |  |  | 0.931 |  |  | 0.394 |
| Upper | 13（5.0） | 2（6.1） | 11（4.9） |  | 3（11.1） | 10（4.3） |  |
| Midpiece | 140（54.1） | 17（51.5） | 123（54.4） |  | 14（51.9） | 126（54.3） |  |
| Lower | 106（40.9） | 14（42.4） | 92（40.7） |  | 10（37.0） | 96（41.4） |  |
| **Tumor size** |  |  |  | 0.705 |  |  | 0.917 |
| ＜3cm | 79（30.5） | 11（33.3） | 68（30.1） |  | 8（29.6） | 71（30.6） |  |
| ≥3cm | 180（69.5） | 22（66.7） | 158（69.9） |  | 19（70.4） | 161（69.4） |  |
| **Differentiation** |  |  |  | 0.457 |  |  | 0.241 |
| Well | 64（24.7） | 7（21.2） | 57（25.2） |  | 9（33.3） | 55（23.7） |  |
| Moderate | 145（56.0） | 17（51.5） | 128（56.6） |  | 11（40.7） | 134（57.8） |  |
| Poorly | 50（19.3） | 9（27.3） | 41（18.1） |  | 7（25.9） | 43（18.5） |  |
| **Lymph metastasis** |  |  |  | 0.297 |  |  | 0.584 |
| Negative | 170（65.6） | 19（57.6） | 151（66.8） |  | 19（70.4） | 151（65.1） |  |
| Positive | 89（34.4） | 14（42.4） | 75（33.2） |  | 8（29.6） | 81（34.9） |  |
| **AJCC stage** |  |  |  | 0.214 |  |  | 0.616 |
| Ⅰ-Ⅱ | 181（69.6） | 20（60.6） | 161（71.2） |  | 20（74.1） | 161（69.4） |  |
| Ⅲ-Ⅳ | 78（30.1） | 13（39.4） | 65（28.8） |  | 7（25.9） | 71（30.6） |  |
| **Nerve invasion** |  |  |  | 0.156 |  |  | 0.161 |
| Negative | 203（78.4） | 29（87.9） | 174（77.0） |  | 24（88.9） | 179（77.2） |  |
| Positive | 56（21.6） | 4（12.1） | 52（23.0） |  | 3（11.1） | 53（22.8） |  |
| **Postoperative treatment** |  |  |  | 0.229 |  |  | 0.988 |
| No | 86（33.2） | 14（42.4） | 72（31.9） |  | 9（33.3） | 77（33.2） |  |
| Yes | 173（66.8） | 19（57.6） | 154（68.1） |  | 18（66.7） | 155（66.8） |  |
| **Abbreviations: AJCC:American Joint Committee on Cancer** | | | | | | | |
