# Supplementary material for: UBE2S and HIF1α expression patterns and stratified analysis reveal prognostic value in esophageal squamous cell carcinoma
Source: PeerJ journal article supplement (doi:10.7717/peerj.20694), 2026-01-28
Supplement: Table_S2.docx [file Table_S2.docx]

|  | **Number(%)** | **p110α** | | |
| --- | --- | --- | --- | --- |
| Negative（%） | Positive（%） | **P** |
| Age（years） |  |  |  | 0.946 |
| ≤60 | 91（35.1） | 10（35.7） | 81（35.1） |  |
| ＞60 | 168（64.9） | 18（64.3） | 150（64.9） |  |
| **Gender** |  |  |  | 0.526 |
| Male | 180（69.5） | 18（64.3） | 162（70.1） |  |
| Female | 79（30.5） | 10（35.7） | 69（29.9） |  |
| **Nationality** |  |  |  | 0.523 |
| Han | 135（52.1） | 13（46.4） | 122（52.8） |  |
| Kazak | 124（47.9） | 15（53.6） | 109（47.2） |  |
| **location** |  |  |  | 0.217 |
| Upper | 13（5.0） | 0（0.0） | 13（5.6） |  |
| Midpiece | 140（54.1） | 16（57.1） | 124（53.7） |  |
| Lower | 106（40.9） | 12（42.9） | 94（40.7） |  |
| **Tumor size** |  |  |  | 0.705 |
| ＜3cm | 79（30.5） | 7（25.0） | 72（31.2） |  |
| ≥3cm | 180（69.5） | 21（75.0） | 159（68.8） |  |
| **Differentiation** |  |  |  | 0.199 |
| Well | 64（24.7） | 9（32.1） | 55（23.8） |  |
| Moderate | 145（56.0） | 17（60.7） | 128（55.4） |  |
| Poorly | 50（19.3） | 2（7.1） | 48（20.8） |  |
| **Lymph metastasis** |  |  |  | 0.793 |
| Negative | 170（65.6） | 19（67.9） | 151（65.4） |  |
| Positive | 89（34.4） | 9（32.1） | 80（34.6） |  |
| **Invasion depth** |  |  |  | 0.943 |
| Mucosa | 11（4.2） | 1（3.6） | 10（4.3） |  |
| Muscularis | 113（43.6） | 13（46.4） | 100（43.3） |  |
| Full thickness | 135（52.1） | 14（50.0） | 121（52.4） |  |
| **AJCC stage** |  |  |  | 0.494 |
| Ⅰ-Ⅱ | 181（69.6） | 18（64.3） | 163（70.6） |  |
| Ⅲ-Ⅳ | 78（30.1） | 10（35.7） | 68（29.4） |  |
| **Vessel invasion** |  |  |  | 0.287 |
| Negative | 205（79.2） | 20（71.4） | 185（80.1） |  |
| Positive | 54（20.8） | 8（58.6） | 46（19.9） |  |
| **Nerve invasion** |  |  |  | 0.608 |
| Negative | 203（78.4） | 23（82.1） | 180（77.9） |  |
| Positive | 56（21.6） | 5（17.9） | 51（22.1） |  |
| **Postoperative treatment** |  |  |  | 0.161 |
| No | 86（33.2） | 6（21.4） | 80（34.6） |  |
| Yes | 173（66.8） | 22（78.6） | 151（65.4） |  |
| **Abbreviations: AJCC:American Joint Committee on Cancer** | | | | |
